# Supplementary material for: TEMPO-immobilized metal–organic frameworks for efficient oxidative coupling of 2-aminophenols and aldehydes to benzoxazoles
Source: Royal Society of Chemistry journal article supplement (doi:10.1039/d3ce01146a), 2023-12-01

*Electronic Supplementary Information*

TEMPO-immobilized metal-organic frameworks for  
efficient oxidative coupling of 2-aminophenols and  
aldehydes to benzoxazoles

**Table of Contents**

|                                                                                                        |     |
|--------------------------------------------------------------------------------------------------------|-----|
| <i>1. General Materials and Methods</i>                                                                | S2  |
| <i>2. Synthesis of H<sub>2</sub>tpdc-TEMPO Ligands</i>                                                 | S2  |
| <i>3. Synthesis of PDI substrate</i>                                                                   | S3  |
| <i>4. Detailed Procedures for MOF Preparation</i>                                                      | S4  |
| <i>5. General Procedure of MOF Characterizations</i>                                                   | S5  |
| <i>6. General Procedure of the Obtained Product</i>                                                    | S5  |
| <i>7. Characterization of Obtained Product</i>                                                         | S6  |
| <i>8. Role of TEMPO species in each step of sequential reaction from the reported references</i>       | S8  |
| <i>9. Supplementary Figures and Tables</i>                                                             | S9  |
| <i>10. References for the Supporting Information</i>                                                   | S18 |
| <i>11. APPENDIX I</i><br><i><sup>1</sup>H NMR, <sup>13</sup>C NMR, FT-IR of the Obtained Molecules</i> | S19 |



**TPDC-TEMPO:**<sup>S1</sup> Ph-Br<sub>2</sub>-TEMPO (TEMPO = 2,2,6,6-tetramethylpiperidin-1-yl)oxyl, 3.5 g, 8.0 mmol), 4-methoxycarbonylphenylboronic acid pinacol ester (4.8 g, 18.0 mmol), Pd(PPh<sub>3</sub>)<sub>4</sub> (277 mg, 0.24 mmol) and Pd(dppf)Cl<sub>2</sub> (653 mg, 0.8 mmol) were dissolved in anhydrous THF (80 mL). Cs<sub>2</sub>CO<sub>3</sub> (7.9 g, 24.0 mmol) and CsF (604 mg, 4.0 mmol) were dissolved in H<sub>2</sub>O (4 mL), and this base solution was added to reaction solution. The mixture was heated to 75 °C and stirred in heating mantle for 24 h under nitrogen atmosphere. After cooling to room temperature, the insoluble solids were removed by Celite filtration. Then the mixture was extracted with DCM, and washed with brine. And the organic portions were dried over MgSO<sub>4</sub>, and the organic solvent was removed in vacuo. The crude product was purified by silica gel column chromatography (EtOAc:*n*-hexane = 1:3). And target product, TPDC-TEMPO (2.2 g, 4.0 mmol, 50%) was obtained as a red solid.

<sup>1</sup>H NMR (400 MHz, DMSO 0.05% v/v TMS with phenylhydrazine) δ 8.13 (d, *J* = 7.9 Hz, 1H), 8.12 – 8.06 (m, 2H), 8.03 – 7.98 (m, 2H), 7.96 – 7.87 (m, 3H), 7.79 (d, *J* = 2.0 Hz, 1H), 7.60 – 7.53 (m, 3H), 4.04 – 3.93 (m, 1H), 3.89 (s, 4H), 3.88 (s, 3H), 1.59 – 1.50 (m, 2H), 1.23 – 1.14 (m, 2H), 1.06 – 0.98 (m, 12H); <sup>13</sup>C NMR (101 MHz, DMSO with phenylhydrazine) δ 167.66, 166.13, 166.03, 144.57, 143.41, 138.20, 138.15, 138.11, 130.51, 129.95, 129.03, 128.88, 128.82, 128.34, 127.80, 127.07, 126.19, 57.77, 52.24, 52.20, 44.33, 40.69, 32.63, 19.62.

**H<sub>2</sub>tpdc-TEMPO:**<sup>S1</sup> TPDC-TEMPO (2.2 g, 4.0 mmol) was dissolved in THF (60 mL) and MeOH (10 mL). LiOH (0.7 g, 29.3 mmol) was dissolved in H<sub>2</sub>O (27 mL), and LiOH solution was added to the mixture. The mixture was heated to 75 °C and stirred in heating mantle for 24 h under nitrogen atmosphere. After cooling to room temperature, the organic solvents were removed by evaporation, and insoluble solids were removed by Celite filtration with H<sub>2</sub>O. The aqueous phase was adjusted to pH 3 with aqueous 1M HCl solution. The precipitates were collected by filtration, washed with H<sub>2</sub>O and dried under vacuo. Target product, H<sub>2</sub>tpdc-TEMPO (1.9 g, 3.8 mmol, 95%) was obtained as a pale-pink solid.

<sup>1</sup>H NMR (500 MHz, DMSO with phenylhydrazine) δ 8.12 (d, *J* = 7.9 Hz, 1H), 8.09 – 8.04 (m, 2H), 8.02 – 7.94 (m, 2H), 7.93 – 7.86 (m, 3H), 7.77 (d, *J* = 2.1 Hz, 1H), 7.59 – 7.51 (m, 3H), 4.05 – 3.91 (m, 1H), 1.55 (dd, *J* = 12.6, 3.8 Hz, 2H), 1.21 (t, *J* = 12.4 Hz, 2H), 1.04 (d, *J* = 12.1 Hz, 12H); <sup>13</sup>C NMR (101 MHz, DMSO with phenylhydrazine) δ 167.81, 167.50, 167.37, 144.02, 142.91, 138.31, 138.19, 130.50, 130.11, 129.20, 128.62, 128.36, 127.76, 126.87, 126.11, 58.23, 44.19, 40.60, 32.33, 19.67.

### 3. Synthesis of PDI substrate

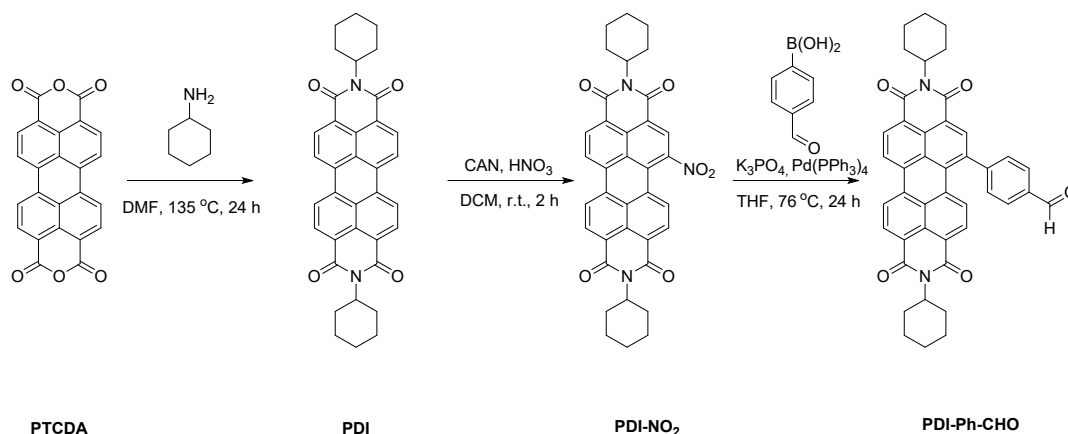

**Scheme S2.** Preparation of PDI-Ph-CHO.

**PDI (Perylenediimide):**<sup>S2</sup> Perylene-3,4:9,10-tetracarboxylic acid dianhydride (PTCDA, 785 mg, 2 mmol) was added in DMF(40 mL), and the 5 mL of cyclohexylamine was added to a suspension. The mixture was stirred at 135 °C for 24 h. After cooling, 1 M HCl (15 mL) was added, then MeOH (40 mL) was added to the mixture. The precipitate was filtered, and washed with MeOH. The precipitate was dried at 70 °C under vacuum overnight (1.3 g, 85%). Red solid, <sup>1</sup>H NMR (500 MHz, CDCl<sub>3</sub>) δ 8.66 (d, *J* = 8.0 Hz, 4H), 8.60 (d, *J* = 8.1 Hz, 4H), 5.09 – 5.01 (m, 2H), 2.63 – 2.51(m, 4H), 1.92 (d, *J* = 13.1 Hz, 4H), 1.78 (d, *J* = 13.7 Hz, 6H), 1.53 – 1.40 (m, 6H).

**PDI-NO<sub>2</sub> (Perylenediimide-NO<sub>2</sub>):**<sup>S2</sup> PDI (1.0 g, 1.8 mmol) and CAN (ceric ammonium nitrate, 1.2 g, 2.2 mmol) were dissolved in DCM (150 mL). Nitric acid (2.0 g, 31.7 mmol) was slowly added at 25 °C under N<sub>2</sub> for 2 h with stirring. The solution was neutralized with 10% KOH and was extracted with DCM. The mixture was dried over anhydrous MgSO<sub>4</sub>, and the organic solvent was removed in vacuo. The crude product was purified by silica gel column chromatography (DCM) (971 mg, 90%). Red solid, <sup>1</sup>H NMR (500 MHz, CDCl<sub>3</sub>) δ 8.77 (d, *J* = 8.0 Hz, 1H), 8.74 – 8.66 (m, 4H), 8.59 (d, *J* = 8.1 Hz, 1H), 8.24 (d, *J* = 8.2 Hz, 1H), 5.03 (t, *J* = 12.3 Hz, 2H), 2.59 – 2.49 (m, 4H), 1.92 (d, *J* = 12.8 Hz, 4H), 1.76 (d, *J* = 11.0 Hz, 6H), 1.52 – 1.42 (m, 4H), 1.40 – 1.28 (m, 2H); <sup>13</sup>C NMR (125 MHz, CDCl<sub>3</sub>) δ 163.6, 163.3, 163.2, 162.3, 147.7, 135.5, 132.9, 131.4, 131.2, 129.4, 129.3, 129.0, 128.0, 127.8, 127.5, 126.6, 126.5, 126.4, 125.5, 125.5, 124.7, 124.6, 124.1, 123.7, 54.6, 54.4, 29.2, 29.2, 26.6, 26.6, 25.5, 25.5.

**PDI-Ph-CHO (Perylenediimide-phenylaldehyde):**<sup>S2</sup> PDI-NO<sub>2</sub> (600 mg, 1.0 mmol), K<sub>3</sub>PO<sub>4</sub> (637 mg, 3.0 mmol), 4-formylphenyl boronic acid (200 mg, 1.33 mmol), and Pd(PPh<sub>3</sub>)<sub>4</sub> (116 mg, 0.10 mmol) were dissolved in dry THF under N<sub>2</sub>. The mixture was stirred at 75 °C for 48 h under N<sub>2</sub>. After cooling, the organic solvent was removed in vacuo. The crude product was purified by silica gel column chromatography (DCM), and recrystallized in DCM/*n*-hexane condition (527 mg, 80%). Red solid, <sup>1</sup>H NMR (500 MHz, CDCl<sub>3</sub>) δ 10.14 (s, 1H), 8.70 (d, *J* = 7.9 Hz, 3H), 8.67 – 8.57 (m, 1H), 8.51 (s, 1H), 8.14 – 8.01 (m, 3H), 7.76 – 7.63 (m, 3H), 5.08 – 4.96 (m, 2H), 2.61 – 2.48 (m, 4H), 1.99 – 1.85 (m, 4H), 1.83 – 1.67 (m, 4H), 1.53 – 1.39 (m, 4H), 1.39 – 1.25 (m, 2H); <sup>13</sup>C NMR (125 MHz, CDCl<sub>3</sub>) δ 191.5, 163.9, 163.7, 163.6, 148.9, 140.0, 136.2, 135.3, 134.8, 134.1, 133.9, 132.7, 131.7, 131.3, 131.1, 130.3, 130.0, 129.9, 129.6, 129.0, 128.6, 128.0, 127.4, 124.0, 123.7, 123.3, 123.2, 123.1, 123.0, 54.3, 54.1, 29.2, 29.2, 26.7, 26.6, 25.6, 25.5.

#### 4. Detailed Procedures for MOF Preparation

**UiO-68-(TEMPO)<sub>1.0</sub>:**<sup>S1</sup> H<sub>2</sub>tpdc-TMEPO (214 mg, 0.42 mmol), ZrCl<sub>4</sub> (96 mg, 0.42 mmol), and benzoic acid (BzOH, 760 mg, 6.2 mmol) were charged in a round bottom flask (250 mL) with a magnetic stirring bar (3 mm x 6 mm), and the mixtures were dissolved in DMF (16 mL). The mixture was stirred (300 rpm) at 120 °C in heating mantle for 48 h. After cooling to room temperature, the microcrystalline powder was isolated by centrifugation (3600 rpm). and washed 3 times with fresh DMF (3 x 10 mL), washed 3 times with MeOH (3 x 10 mL), and washed 3 times with acetone (3 x 10 mL). The solids were dried under vacuum for 24 h yielded the activated UiO-68-TEMPO.

**UiO-68-(TEMPO)<sub>0.75</sub>(Me<sub>2</sub>)<sub>0.25</sub>:** H<sub>2</sub>tpdc-TMEPO (160 mg, 0.31 mmol) and H<sub>2</sub>tpdc-Me<sub>2</sub> (36 mg, 0.10 mmol) were used for UiO-68-(TEMPO)<sub>0.75</sub>(Me<sub>2</sub>)<sub>0.25</sub> preparation.

**UiO-68-(TEMPO)<sub>0.75</sub>(Me<sub>2</sub>)<sub>0.25</sub>:** H<sub>2</sub>tpdc-TMEPO (108 mg, 0.21 mmol) and H<sub>2</sub>tpdc-Me<sub>2</sub> (72 mg, 0.21 mmol) were used for UiO-68-(TEMPO)<sub>0.75</sub>(Me<sub>2</sub>)<sub>0.25</sub> preparation.

**UiO-68-(TEMPO)<sub>0.25</sub>(Me<sub>2</sub>)<sub>0.75</sub>:** H<sub>2</sub>tpdc-TMEPO (53 mg, 0.10 mmol) and H<sub>2</sub>tpdc-Me<sub>2</sub> (108 mg, 0.31 mmol) were used for UiO-68-(TEMPO)<sub>0.25</sub>(Me<sub>2</sub>)<sub>0.75</sub> preparation.

**UiO-68-(Me<sub>2</sub>)<sub>1.0</sub>:** H<sub>2</sub>tpdc-Me<sub>2</sub> (145 mg, 0.42 mmol) were used for UiO-68-(Me<sub>2</sub>)<sub>1.0</sub> preparation.

## 5. General procedure of MOF Characterizations.

**MOF digestion for NMR measurement:** approximately 10 mg of MOFs were dried under vacuum and digested with sonication in 590  $\mu\text{L}$  of DMSO- $d_6$  and 10  $\mu\text{L}$  of HF (48% aqueous solution). Phenylhydrazine was employed together for TEMPO-based molecules as a reducing agent for the paramagnetic nitroxide radicals to the corresponding hydroxylamine.

**PXRD (Powder X-ray diffraction):** PXRD data was collected at ambient temperature on a Rigaku Miniflex at 40 kV, 15 mA for CuK $\alpha$  ( $\lambda = 1.5406 \text{ \AA}$ ), with a scan speed of 1 sec/step, a step size of  $0.02^\circ$  in  $2\theta$ , and a  $2\theta$  range of  $3\text{-}30^\circ$ .

**N<sub>2</sub> full isotherms for MOF-TEMPO:** The N<sub>2</sub> full sorption isotherms were obtained using a ASAP2020 at 77K. Prior to the sorption measurements, the sample was activated as following steps. Approximately 30-60 mg of MOF sample was evacuated under vacuum for a moment at room temperature. Samples were then transferred to a pre-weighed sample tube and degassed at 150 °C on an ASAP2020 for a minimum of 24 h or until the outgas rate was  $< 5 \mu\text{m Hg/min}$ . The sample tube was re-weighed to obtain a consistent mass for the degassed MOF materials.

## 6. General Procedure of the Obtained Products

### Optimization Condition

**General Procedure A (See Table 1):** 2-Aminophenol (1.0mmol) and benzaldehyde (1.0 mmol) were placed in the 4 mL vial and dissolved in 2 mL of solvent. The mixture was stirred for 30 min at room temperature and the UiO-68-(TEMPO)<sub>1.0</sub> (63 mg, 10 mol% of TEMPO) was added. The mixture was heated to temperature, and kept stirred for time under oxygen atmosphere. After cooling to room temperature, MOF catalyst was removed by centrifugation, and washed with DCM and acetone three times each. The desired product was isolated by a silica gel column chromatography with ethyl acetate-hexane as the eluent.

### Reaction Condition for Effects of Immobilization amounts in UiO-68-TEMPO

**General Procedure B (See Table S2):** 2-Aminophenol (0.5 mmol) and benzaldehyde (0.5 mmol) were placed in the 4 mL vial and dissolved in 1 mL of *p*-xylene. The mixture was stirred for 30 min at room temperature and the UiO-66-(TEMPO)<sub>1.0</sub> (16 mg, 5 mol% of TEMPO), UiO-66-(TEMPO)<sub>0.75</sub>(Me<sub>2</sub>)<sub>0.25</sub> (20 mg, 5 mol% of TEMPO), UiO-66-(TEMPO)<sub>0.5</sub>(Me<sub>2</sub>)<sub>0.5</sub> (27 mg, 5 mol% of TEMPO), UiO-66-(TEMPO)<sub>0.25</sub>(Me<sub>2</sub>)<sub>0.75</sub> (50 mg, 5 mol% of TEMPO) was added. The mixture was heated to 100 °C, and kept stirred for time under oxygen atmosphere. After cooling to room temperature, MOF catalyst was removed by centrifugation, and washed with DCM and acetone three times each. The desired product was isolated by a silica gel column chromatography with ethyl acetate-hexane as the eluent.

### Oxidative Coupling Reactions with Various Substrate Scopes

**General Procedure C (See Fig. 3):** 2-Aminophenol (0.5 mmol) and benzaldehyde (0.5 mmol) were placed in the 4 mL vial and dissolved in 1 mL of *p*-xylene. The mixture was stirred for 30 min at room temperature and the UiO-66-(TEMPO)<sub>1.0</sub> (32 mg, 10 mol% of TEMPO) was added. The mixture was heated to 100 °C, and kept stirred for 24 h under oxygen atmosphere. After cooling to room temperature, MOF catalyst was removed by

centrifugation, and washed with DCM and acetone three times each. The desired product was isolated by a silica gel column chromatography with ethyl acetate-hexane as the eluent.

#### Reaction Condition for Heterogeneous and Homogeneous Conditions

**General Procedure D (See in Scheme 3):** PDI-Ph-CHO (Perylenediimide-phenylaldehyde) **1j** (65.9 mg, 0.1 mmol) and 2-Aminophenol **1a** (5.5 mg, 0.1 mmol) were placed in the 4 mL vial and dissolved in 1 mL of *p*-xylene. The mixture was stirred for 30 min at room temperature and the TEMPO-catalyst (10 mol%; 6.4 mg of UiO-66-(TEMPO)<sub>1.0</sub> or 5.4 mg of TPDC-TEMPO) was added. The mixture was heated to 100 °C, and kept stirred for 24 h under oxygen atmosphere. After cooling to room temperature, MOF catalyst was removed by centrifugation, and washed with DCM and acetone three times each. The desired product was isolated by a silica gel column chromatography with ethyl acetate-hexane as the eluent (Ethyl acetate: Hexane = 1:5, 1:3)

#### Reaction Condition for One-pot Sequential Aerobic Oxidation-oxidative cyclization

**General Procedure E (See Scheme 4) :** Benzyl alcohol (0.5 mmol), UiO-66-(TEMPO)<sub>1.0</sub> (32 mg, 10 mol% of TEMPO) and *t*-BuCN 1 mL were added to the 4 mL vial. *tert*-butyl nitrite (5 mg, 0.05 mmol) was added to the mixture, and then the mixture was stirred for 3 h at 80 °C under oxygen atmosphere. After 3 h, cooled the mixture to room temperature and monitored full conversion of benzyl alcohol by thin-layer chromatography. After conversion of benzyl alcohol to aldehyde was complete, 2-Phenyl-4,4,5,5-tetramethylimidazoline-1-oxyl 3-oxide (12 mg, 0.05 mmol) and 2-aminophenol (55 mg, 0.5 mmol) was added in to mixture and added 1 mL of *p*-xylene. The mixture was heated to 100 °C, and kept stirred for 48 h under oxygen atmosphere. After cooling to room temperature, MOF catalyst was removed by centrifugation, and washed with DCM and acetone three times each. The desired product was isolated by a silica gel column chromatography with ethyl acetate-hexane (1:50 v/v) as the eluent, obtained as a colorless solid.

### 7. Characterization of the Obtained Products

2-Phenylbenzoxazole (**3aa**):<sup>S3</sup> Benzaldehyde **1a** (51  $\mu$ L, 0.5 mmol) was reacted with aminophenol **2a** (54.5 mg, 0.5 mmol) following the general procedure C. After purification by column chromatography (Ethyl acetate: Hexane = 1: 50), 2-Phenylbenzoxazole **3aa** was obtained as a colorless solid. <sup>1</sup>H NMR (500 MHz, CDCl<sub>3</sub>)  $\delta$  8.30 – 8.24 (m, 2H), 7.81 – 7.77 (m, 1H), 7.61 – 7.57 (m, 3H), 7.55 – 7.52 (m, 1H), 7.39 – 7.33 (m, 1H); <sup>13</sup>C NMR (500 MHz, CDCl<sub>3</sub>):  $\delta$  163.2, 150.9, 142.2, 131.7, 129.1, 127.8, 127.3, 125.3, 124.8, 120.2, 110.8.

2-(*p*-Tolyl)benzoxazole (**3ba**):<sup>S4</sup> 4-Methylbenzaldehyde **1b** (59  $\mu$ L, 0.5 mmol) was reacted with aminophenol **2a** (54.5 mg, 0.5 mmol) following the general procedure C. After purification by column chromatography (Ethyl acetate: Hexane = 1: 50), 2-(*p*-Tolyl)benzoxazole **3ba** was obtained as a colorless solid. <sup>1</sup>H NMR (500 MHz, CDCl<sub>3</sub>)  $\delta$  8.15 (d, *J* = 8.2 Hz, 2H), 7.80 – 7.73 (m, 1H), 7.61 – 7.54 (m, 1H), 7.36 – 7.31 (m, 4H), 2.44 (s, 3H); <sup>13</sup>C NMR (500 MHz, CDCl<sub>3</sub>):  $\delta$  163.4, 150.8, 142.3, 142.2, 129.8, 127.7, 125.0, 124.6, 124.5, 112.0, 110.6, 21.8.

2-(*m*-Tolyl)benzoxazole (**3ca**):<sup>S4</sup> 3-Methylbenzaldehyde **1c** (59  $\mu$ L, 0.5 mmol) was reacted with aminophenol **2a** (54.5 mg, 0.5 mmol) following the general procedure C. After purification by column chromatography (Ethyl acetate: Hexane = 1: 50), 2-(*m*-Tolyl)benzoxazole **3ca** was obtained as a colorless solid. <sup>1</sup>H NMR (500 MHz, CDCl<sub>3</sub>)  $\delta$  8.11 (s, 1H), 8.06 (d, *J* = 7.7 Hz, 1H), 7.80 – 7.75 (m, 1H), 7.61 – 7.55 (m, 1H), 7.42 (t, *J* = 7.6 Hz, 1H), 7.39 – 7.33 (m, 3H), 2.46 (s, 3H); <sup>13</sup>C NMR (500 MHz, CDCl<sub>3</sub>):  $\delta$  163.4, 150.9, 142.3, 138.9, 132.5, 129.0, 128.3, 127.2, 125.2, 124.9, 124.7, 120.1, 110.7, 21.5.

2-(*o*-Tolyl)benzoxazole (**3da**):<sup>S3</sup> 2-Methylbenzaldehyde **1d** (58  $\mu$ L, 0.5 mmol) was reacted with aminophenol **2a** (54.5 mg, 0.5 mmol) following the general procedure C. After purification by column chromatography (Ethyl

acetate: Hexane = 1: 50), 2-(*o*-Tolyl)benzoxazole **3da** was obtained as a colorless solid. <sup>1</sup>H NMR (500 MHz, CDCl<sub>3</sub>) δ 8.18 (dd, *J* = 8.1, 1.5 Hz, 1H), 7.84 – 7.79 (m, 1H), 7.62 – 7.58 (m, 1H), 7.44 – 7.40 (m, 1H), 7.39 – 7.34 (m, 4H), 2.82 (s, 3H); <sup>13</sup>C NMR (500 MHz, CDCl<sub>3</sub>) : δ 163.6, 150.4, 142.3, 139.0, 131.9, 131.1, 130.1, 126.4, 126.2, 125.2, 124.5, 120.3, 110.6, 22.4.

2-(4-Methoxyphenyl)benzoxazole (**3ea**):<sup>S3</sup> 4-Methoxybenzaldehyde **1e** (60 μL, 0.5 mmol) was reacted with aminophenol **2a** (54.5 mg, 0.5 mmol) following the general procedure C. After purification by column chromatography (Ethyl acetate: Hexane = 1: 50), 2-(4-Methoxyphenyl)benzoxazole **3ea** was obtained as a colorless solid. <sup>1</sup>H NMR (500 MHz, CDCl<sub>3</sub>) δ 8.22 – 8.18 (m, 2H), 7.77 – 7.69 (m, 1H), 7.58 – 7.52 (m, 1H), 7.36 – 7.29 (m, 2H), 7.06 – 7.00 (m, 2H), 3.89 (s, 3H); <sup>13</sup>C NMR (500 MHz, CDCl<sub>3</sub>) : δ 163.3, 162.5, 150.8, 142.4, 129.5, 124.7, 124.6, 119.8, 119.8, 114.5, 110.5, 55.6.

2-(4-Chlorophenyl)benzoxazole (**3fa**):<sup>S3</sup> 4-Chlorobenzaldehyde **1f** (70.2 mg, 0.5 mmol) was reacted with aminophenol **2a** (54.5 mg, 0.5 mmol) following the general procedure C. After purification by column chromatography (Ethyl acetate: Hexane = 1: 60), 2-(4-Chlorophenyl)benzoxazole **3fa** was obtained as a colorless solid. <sup>1</sup>H NMR (500 MHz, CDCl<sub>3</sub>) δ 8.19 (d, *J* = 8.6 Hz, 2H), 7.80 – 7.73 (m, 1H), 7.61 – 7.55 (m, 1H), 7.50 (d, *J* = 8.6 Hz, 1H), 7.39 – 7.35 (m, 2H); <sup>13</sup>C NMR (500 MHz, CDCl<sub>3</sub>) : δ 162.2, 150.9, 142.2, 137.9, 129.4, 129.0, 125.8, 125.5, 124.9, 120.2, 110.8.

4-(Benzoxazol-2-yl)benzotrile (**3ga**):<sup>S4</sup> 4-Formylbenzotrile **1g** (65.6 mg, 0.5 mmol) was reacted with aminophenol **2a** (54.5 mg, 0.5 mmol) following the general procedure C. After purification by column chromatography (Ethyl acetate: Hexane = 1: 50), 4-(Benzoxazol-2-yl)benzotrile **3ga** was obtained as a colorless solid. <sup>1</sup>H NMR (500 MHz, CDCl<sub>3</sub>) δ 8.36 (d, *J* = 8.4 Hz, 2H), 7.85 – 7.77 (m, 3H), 7.66 – 7.59 (m, 1H), 7.46 – 7.37 (m, 2H); <sup>13</sup>C NMR (500 MHz, CDCl<sub>3</sub>) : δ 161.1, 151.0, 142.0, 132.8, 131.3, 128.1, 126.3, 125.3, 120.7, 118.3, 114.9, 111.01.

2-(4-Nitrophenyl)benzoxazole (**3ha**):<sup>S3</sup> 4-Nitrobenzaldehyde **1h** (75.6 mg, 0.5 mmol) was reacted with aminophenol **2a** (54.5 mg, 0.5 mmol) following the general procedure C. After purification by recrystallization DCM and hexane, 4-(Benzoxazol-2-yl)benzotrile **3ha** was obtained as a colorless solid. <sup>1</sup>H NMR (500 MHz, CDCl<sub>3</sub>) δ 8.46 – 8.37 (m, 4H), 7.85 – 7.81 (m, 1H), 7.65 – 7.62 (m, 1H), 7.43 (tt, *J* = 7.4, 5.8 Hz, 2H); <sup>13</sup>C NMR (500 MHz, CDCl<sub>3</sub>) : δ 160.81, 151.18, 149.55, 142.07, 132.96, 128.55, 126.49, 125.38, 124.38, 120.84, 111.10.

2-(*tert*-Butyl)benzoxazole (**3ia**):<sup>S3</sup> Pivalaldehyde **1i** (54 μL, 0.5 mmol) was reacted with aminophenol **2a** (54.5 mg, 0.5 mmol) following the general procedure C. After purification by column chromatography (Ethyl acetate: Hexane = 1: 50), 2-(*tert*-Butyl)benzoxazole **3ia** was obtained as a yellow oil. <sup>1</sup>H NMR (500 MHz, CDCl<sub>3</sub>) δ 7.74 – 7.66 (m, 1H), 7.52 – 7.46 (m, 1H), 7.35 – 7.27 (m, 2H), 1.50 (s, 9H); <sup>13</sup>C NMR (126 MHz, CDCl<sub>3</sub>) δ 173.7, 150.9, 141.2, 124.6, 124.1, 119.8, 110.5, 34.3, 28.6.

4-Methyl-2-phenylbenzoxazole (**3ab**):<sup>S4</sup> Benzaldehyde **1a** (51 μL, 0.5 mmol) was reacted with 2-Amino-3-methylphenol **2b** (61.6 mg, 0.5 mmol) following the general procedure C. After purification by column chromatography (Ethyl acetate: Hexane = 1: 100, 1: 30), 4-Methyl-2-phenylbenzoxazole **3ab** was obtained as a colorless solid. <sup>1</sup>H NMR (500 MHz, CDCl<sub>3</sub>) δ 8.35 – 8.21 (m, 3H), 7.61 – 7.47 (m, 4H), 7.41 (d, *J* = 8.1 Hz, 1H), 7.29 – 7.21 (m, 1H), 7.15 (d, *J* = 7.5 Hz, 1H), 2.69 (s, 3H); <sup>13</sup>C NMR (126 MHz, CDCl<sub>3</sub>) δ 162.4, 150.6, 141.5, 131.4, 130.7, 129.0, 127.7, 127.5, 125.2, 124.9, 108.0, 16.7.

5-Methyl-2-phenylbenzoxazole (**3ac**):<sup>S4</sup> Benzaldehyde **1a** (51 μL, 0.5 mmol) was reacted with 2-Amino-4-methylphenol **2c** (61.6 mg, 0.5 mmol) following the general procedure C. After purification by column chromatography (Ethyl acetate: Hexane = 1: 30), 5-Methyl-2-phenylbenzoxazole **3ac** was obtained as a colorless solid. <sup>1</sup>H NMR (500 MHz, CDCl<sub>3</sub>) δ 8.30 – 8.19 (m, 2H), 7.56 (s, 1H), 7.52 (dd, *J* = 5.1, 2.0 Hz, 3H), 7.45 (d, *J* = 8.3 Hz, 1H), 7.16 (d, *J* = 8.2 Hz, 1H), 2.49 (s, 3H); <sup>13</sup>C NMR (126 MHz, CDCl<sub>3</sub>) δ 163.3, 149.1, 142.4,

6-Methyl-2-phenylbenzoxazole (**3ad**):<sup>S4</sup> Benzaldehyde **1a** (51 μL, 0.5 mmol) was reacted with 2-Amino-5-methylphenol **2d** (61.6 mg, 0.5 mmol) following the general procedure C. After purification by column chromatography (Ethyl acetate: Hexane = 1: 50), 6-Methyl-2-phenylbenzoxazole **3ad** was obtained as a colorless solid. <sup>1</sup>H NMR (500 MHz, CDCl<sub>3</sub>) δ 8.29 – 8.21 (m, 2H), 7.65 (d, *J* = 8.1 Hz, 1H), 7.56 – 7.49 (m, 3H), 7.39 (s,

1H), 7.18 (d,  $J = 8.0$  Hz, 1H), 2.51 (s, 3H);  $^{13}\text{C}$  NMR (126 MHz,  $\text{CDCl}_3$ )  $\delta$  162.7, 151.1, 139.8, 135.8, 131.5, 129.0, 127.6, 127.3, 126.0, 119.4, 110.9, 22.0.

2,5-Diphenylbenzoxazole (**3ae**):<sup>S5</sup> Benzaldehyde **1a** (51  $\mu\text{L}$ , 0.5 mmol) was reacted with 3-Amino-[1,1'-biphenyl]-4-ol **2e** (92.6 mg, 0.5 mmol) following the general procedure C. After purification by column chromatography (Ethyl acetate: Hexane = 1: 30), 2,5-Diphenylbenzoxazole **3ae** was obtained as a colorless solid.  $^1\text{H}$  NMR (500 MHz,  $\text{CDCl}_3$ )  $\delta$  8.34 – 8.25 (m, 2H), 7.98 (d,  $J = 1.7$  Hz, 1H), 7.68 – 7.62 (m, 3H), 7.59 (dd,  $J = 8.5, 1.8$  Hz, 1H), 7.58 – 7.52 (m, 3H), 7.48 (t,  $J = 7.7$  Hz, 2H), 7.38 (t,  $J = 7.4$  Hz, 1H);  $^{13}\text{C}$  NMR (126 MHz,  $\text{CDCl}_3$ )  $\delta$  163.8, 150.5, 142.9, 141.2, 138.6, 131.7, 129.1, 129.0, 127.8, 127.6, 127.4, 127.3, 124.9, 118.6, 110.7.

5-Nitro-2-phenylbenzoxazole (**3af**):<sup>S3</sup> Benzaldehyde **1a** (51  $\mu\text{L}$ , 0.5 mmol) was reacted with 2-Amino-4-nitrophenol **2f** (77.1 mg, 0.5 mmol) following the general procedure C. After purification by column chromatography (Ethyl acetate: Hexane = 1: 30), 5-Nitro-2-phenylbenzoxazole **3af** was obtained as a colorless solid.  $^1\text{H}$  NMR (500 MHz,  $\text{CDCl}_3$ )  $\delta$  8.66 (d,  $J = 2.2$  Hz, 1H), 8.33 (dd,  $J = 8.9, 2.3$  Hz, 1H), 8.31 – 8.24 (m, 2H), 7.69 (d,  $J = 8.9$  Hz, 1H), 7.65 – 7.54 (m, 3H);  $^{13}\text{C}$  NMR (126 MHz,  $\text{CDCl}_3$ )  $\delta$  166.2, 154.5, 145.6, 142.7, 132.8, 129.3, 128.2, 126.1, 121.3, 116.5, 110.9.

2-Phenylbenzothiazole (**3ag**):<sup>S4</sup> Benzaldehyde **1a** (51  $\mu\text{L}$ , 0.5 mmol) was reacted with 2-Aminothiophenol **2g** (62.6 mg, 0.5 mmol) following the general procedure C. After purification by column chromatography (Ethyl acetate: Hexane = 1: 50), 2-Phenylbenzothiazole **3ag** was obtained as a colorless solid.  $^1\text{H}$  NMR (500 MHz,  $\text{CDCl}_3$ )  $\delta$  8.15 – 8.06 (m, 3H), 7.91 (d,  $J = 7.9$  Hz, 1H), 7.55 – 7.46 (m, 4H), 7.43 – 7.36 (m, 1H);  $^{13}\text{C}$  NMR (126 MHz,  $\text{CDCl}_3$ )  $\delta$  168.2, 154.3, 135.2, 133.7, 131.1, 129.2, 127.7, 126.5, 125.3, 123.4, 121.8.

2-Pheny-1H-benzimidazole (**3ah**):<sup>S4</sup> Benzaldehyde **1a** (51  $\mu\text{L}$ , 0.5 mmol) was reacted with Benzene-1,2-diamine **2h** (54.1 mg, 0.5 mmol) following the general procedure C. After purification by column chromatography (Ethyl acetate: Hexane = 1: 3), 2-Pheny-1H-benzimidazole **3ah** was obtained as a yellow solid.  $^1\text{H}$  NMR (500 MHz,  $\text{DMSO}-d_6$ )  $\delta$  12.90 (s, 1H), 8.25 – 8.12 (m, 2H), 7.67 (d,  $J = 7.6$  Hz, 1H), 7.59 – 7.51 (m, 3H), 7.53 – 7.46 (m, 1H), 7.28 – 7.13 (m, 2H);  $^{13}\text{C}$  NMR (126 MHz,  $\text{DMSO } d_6$ )  $\delta$  151.20, 143.8, 135.0, 130.2, 129.8, 128.9, 126.4, 122.5, 121.6, 118.8, 111.3, 39.5.

PDI-Ph-Benzox (Perylenediimide-phenylbenzoxazole) (**3ja**): PDI-Ph-CHO (Perylenediimide-phenylaldehyde) **1j** (65.9 mg, 0.1 mmol) was reacted with 2-aminophenol **1a** (5.5 mg, 0.1 mmol) following the general procedure D. After purification by column chromatography (Ethyl acetate: Hexane = 1: 3), PDI-Ph-Benzox (Perylenediimide-phenylbenzoxazole) **3ja** was obtained as a red solid.  $^1\text{H}$  NMR (500 MHz,  $\text{CDCl}_3$ )  $\delta$  8.72 – 8.59 (m, 4H), 8.58 (s, 1H), 8.46 – 8.41 (m, 2H), 8.12 (d,  $J = 8.2$  Hz, 1H), 7.89 (d,  $J = 8.2$  Hz, 1H), 7.87 – 7.81 (m, 1H), 7.69 – 7.62 (m, 3H), 7.45 – 7.38 (m, 2H), 5.02 (dt,  $J = 28.4, 12.1, 3.7$  Hz, 2H), 2.63 – 2.46 (m, 4H), 1.90 (t,  $J = 16.4$  Hz, 4H), 1.82 – 1.68 (m, 4H), 1.53 – 1.38 (m, 4H), 1.38 – 1.29 (m, 2H);  $^{13}\text{C}$  NMR (125 MHz,  $\text{CDCl}_3$ )  $\delta$  163.9, 163.7, 163.6, 162.3, 151.0, 145.9, 142.0, 140.3, 135.5, 134.8, 134.1, 134.1, 132.6, 131.1, 131.1, 130.3, 130.1, 129.6, 129.4, 129.0, 128.6, 128.0, 127.4, 127.4, 125.7, 125.0, 123.9, 123.7, 123.7, 123.2, 123.1, 122.9, 120.3, 110.9, 54.3, 54.1, 29.2, 29.2, 26.7, 26.6, 25.6, 25.5, 22.8.

## 8. Role of TEMPO species in each step of sequential reaction from the reported references

In the first step of the sequential reaction, based on the reported mechanism of the oxidation of alcohols (Fig. S1), <sup>S1</sup> TEMPO species participates the oxidation of alcohol in the form of TEMPO oxoammonium.<sup>S11, S12</sup> Thermally unstable TBN releases  $\text{NO}_x$  radicals, which in turn oxidize the TEMPO radical to form TEMPO oxoammonium.<sup>S13</sup> This oxoammonium species is reduced to the hydroxylamine species by oxidizing the alcohol moiety to aldehyde. Afterwards, hydroxylamine species can be regenerated into oxoammonium species through  $\text{NO}_x$  radicals and continue to participate in the catalytic cycle.



In the second step of the sequential reaction, based on the previously proposed mechanism of the oxidative cyclization (Fig. S2),<sup>S3</sup> TEMPO radical instead of the TEMPO oxoammonium participates the oxidative cyclization. Therefore, the presence of NO<sub>x</sub> radicals which able to change TEMPO species from radical to oxoammonium could suppress the oxidative cyclization and adding PTIO, which is known to quench NO<sub>x</sub> radicals, could resulting higher conversion rate.

In order to confirm the role of the additives in the second steps, control experiments were conducted (Table S5). Based on entry 1 and 2, oxidative cyclization was suppressed by the presence of the TBN additive, which thermolyzed by NO<sub>x</sub> radical and tert-butoxyl radical or tert-butyl alcohol.<sup>S14, S15</sup> However, *tert*-butyl alcohol (entry 3) and di-*tert*-butylperoxide (DTBP) (entry 4) did not significantly affect reactivity. Therefore, we thought that NO<sub>x</sub> radicals generated due to thermolysis of TBN may have influenced the oxidative cyclization in the second reaction. This is further supported by entry 5, which shows that the oxidative cyclization reaction increases from 16% (entry 1) to 77% (entry 5) by adding PTIO, which is known to quench NO<sub>x</sub> radicals,<sup>S16-S18</sup> to the second reaction. Note that the presence of PTIO solely showed minor effects in oxidative cyclization (entry 6).

### 9. Supplementary Tables and Figures

**Table S1** BET values of UiO-68-(TEMPO)<sub>x</sub>(Me<sub>2</sub>)<sub>1-x</sub> (x = 1.0, 0.75, 0.25, and 0) from N<sub>2</sub> isotherm at 77 K.

| Sample                                                            | BET surface area        |
|-------------------------------------------------------------------|-------------------------|
| UiO-68-(TEMPO) <sub>1.0</sub>                                     | 2,155 m <sup>2</sup> /g |
| UiO-68-(TEMPO) <sub>0.75</sub> (Me <sub>2</sub> ) <sub>0.25</sub> | 2,529 m <sup>2</sup> /g |
| UiO-68-(TEMPO) <sub>0.50</sub> (Me <sub>2</sub> ) <sub>0.50</sub> | 2,686 m <sup>2</sup> /g |
| UiO-68-(TEMPO) <sub>0.25</sub> (Me <sub>2</sub> ) <sub>0.75</sub> | 3,071 m <sup>2</sup> /g |
| UiO-68-(Me <sub>2</sub> ) <sub>1.0</sub>                          | 3,751 m <sup>2</sup> /g |

**Table S2** Total mass of TEMPO-immobilized MOFs and mol fraction of TEMPO.

| Sample                                                            | Molecular formula<br>[Zr <sub>6</sub> O <sub>4</sub> (OH) <sub>4</sub> (H <sub>2</sub> tpdc-TEMPO) <sub>x</sub> (H <sub>2</sub> tpdc-Me <sub>2</sub> ) <sub>6-x</sub> ]                              | Molecular weight of MOF (g/mol) | TEMPO loading (mmol/g) |
|-------------------------------------------------------------------|------------------------------------------------------------------------------------------------------------------------------------------------------------------------------------------------------|---------------------------------|------------------------|
| UiO-68-(TEMPO) <sub>1.0</sub>                                     | [Zr <sub>6</sub> O <sub>4</sub> (OH) <sub>4</sub> (C <sub>30</sub> H <sub>31</sub> N <sub>2</sub> O <sub>6</sub> ) <sub>6</sub> ]                                                                    | 3760.6                          | 1.60                   |
| UiO-68-(TEMPO) <sub>0.75</sub> (Me <sub>2</sub> ) <sub>0.25</sub> | [Zr <sub>6</sub> O <sub>4</sub> (OH) <sub>4</sub> (C <sub>30</sub> H <sub>31</sub> N <sub>2</sub> O <sub>6</sub> ) <sub>4.5</sub> (C <sub>22</sub> H <sub>18</sub> O <sub>4</sub> ) <sub>1.5</sub> ] | 3506.9                          | 1.28                   |
| UiO-68-(TEMPO) <sub>0.50</sub> (Me <sub>2</sub> ) <sub>0.50</sub> | [Zr <sub>6</sub> O <sub>4</sub> (OH) <sub>4</sub> (C <sub>30</sub> H <sub>31</sub> N <sub>2</sub> O <sub>6</sub> ) <sub>3.0</sub> (C <sub>22</sub> H <sub>18</sub> O <sub>4</sub> ) <sub>3.0</sub> ] | 3252.9                          | 0.92                   |
| UiO-68-(TEMPO) <sub>0.25</sub> (Me <sub>2</sub> ) <sub>0.75</sub> | [Zr <sub>6</sub> O <sub>4</sub> (OH) <sub>4</sub> (C <sub>30</sub> H <sub>31</sub> N <sub>2</sub> O <sub>6</sub> ) <sub>1.5</sub> (C <sub>22</sub> H <sub>18</sub> O <sub>4</sub> ) <sub>4.5</sub> ] | 2999.5                          | 0.50                   |
| UiO-68-(Me <sub>2</sub> ) <sub>1.0</sub>                          | [Zr <sub>6</sub> O <sub>4</sub> (OH) <sub>4</sub> (C <sub>22</sub> H <sub>18</sub> O <sub>4</sub> ) <sub>6.0</sub> ]                                                                                 | 2745.6                          | -                      |

**Table S3** Effects of immobilization amounts in UiO-68-TEMPO for the oxidative cyclization of **1a** and **2a** to **3aa**.<sup>a</sup>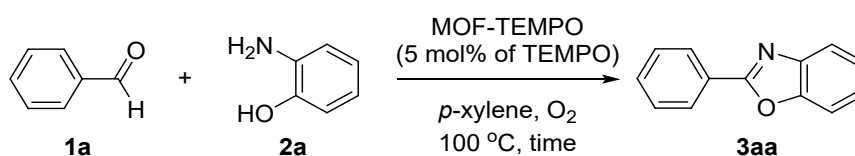

| Entry                          | Time (h) | X in UiO-68-(TEMPO) <sub>x</sub> (Me <sub>2</sub> ) <sub>1-x</sub> |      |      |      |
|--------------------------------|----------|--------------------------------------------------------------------|------|------|------|
|                                |          | 1.0                                                                | 0.75 | 0.5  | 0.25 |
| 1 <sup>b</sup>                 | 24       | 87                                                                 | -    | 86   | -    |
| 2                              | 6        | 50                                                                 | 40   | 32   | 31   |
| 3                              | 12       | 69                                                                 | 63   | 62   | 39   |
| 4                              | 16       | 81                                                                 | 77   | 75   | 51   |
| 5                              | 24       | 86                                                                 | 86   | 85   | 73   |
| 6                              | 48       | 89                                                                 | 88   | 88   | 85   |
| TOF <sub>6h</sub> of catalysts |          | 0.83                                                               | 0.66 | 0.54 | 0.51 |
| TON <sub>6h</sub> of catalysts |          | 5.00                                                               | 4.00 | 3.25 | 3.08 |

<sup>a</sup> Reaction conditions: **1a** (0.5 mmol), **2a** (0.5 mmol), catalyst and solvent (1 mL) were used for the reaction optimization. <sup>b</sup> MOF-TEMPO (10 mol% of TEMPO) was used.

**Table S4** Correlations between the maximum yields and catalyst-loading in various MOF-based catalysts from literature.

| Target reaction           | MOF     | Catalyst in MOF | Yield from optimized cat. loading (%)                      | Yield from maximum cat. loading (%)                              | Ref. |
|---------------------------|---------|-----------------|------------------------------------------------------------|------------------------------------------------------------------|------|
| Henry reaction            | UiO-67  | Urea            | 67% yield with 36% loading                                 | 19% yield with 100% loading                                      | S6   |
| Henry reaction            | PCN-56  | Urea            | 90% yield with 50% loading                                 | 41% yield with 100% loading                                      | S7   |
| Friedel-Craft reaction    | UiO-67  | Squaramide      | 78% yield with 50% loading                                 | 22% yield with 100% loading                                      | S8   |
| Aerobic oxidation         | UiO-67  | TEMPO           | 99% yield with 38% loading                                 | 60% yield with 100% loading                                      | S9   |
| H <sub>2</sub> generation | MIL-125 | Pt and sulfide  | 3814.0 $\mu\text{molg}^{-1}\text{h}^{-1}$ with 20% loading | 2972.4 $\mu\text{molg}^{-1}\text{h}^{-1}$ yield with 50% loading | S10  |

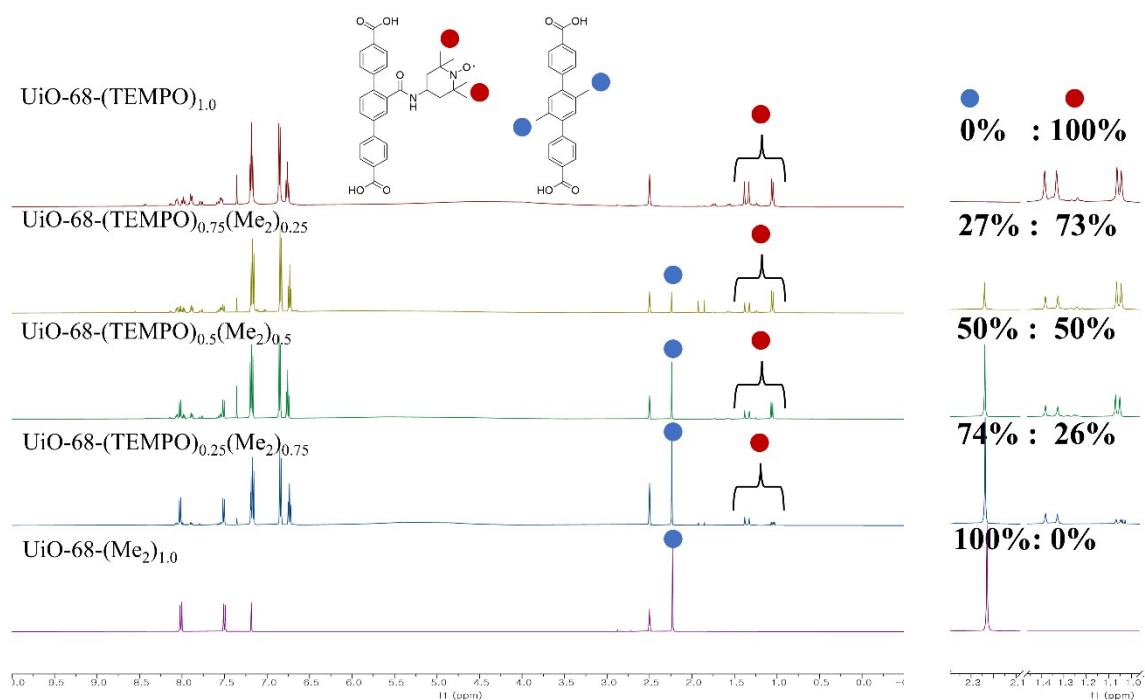

**Fig. S1** <sup>1</sup>H NMR spectra of UiO-68-(TEMPO)<sub>x</sub>(Me<sub>2</sub>)<sub>1-x</sub> (x = 1.0, 0.75, 0.25, and 0) after digestion (stabilized with phenylhydrazine).

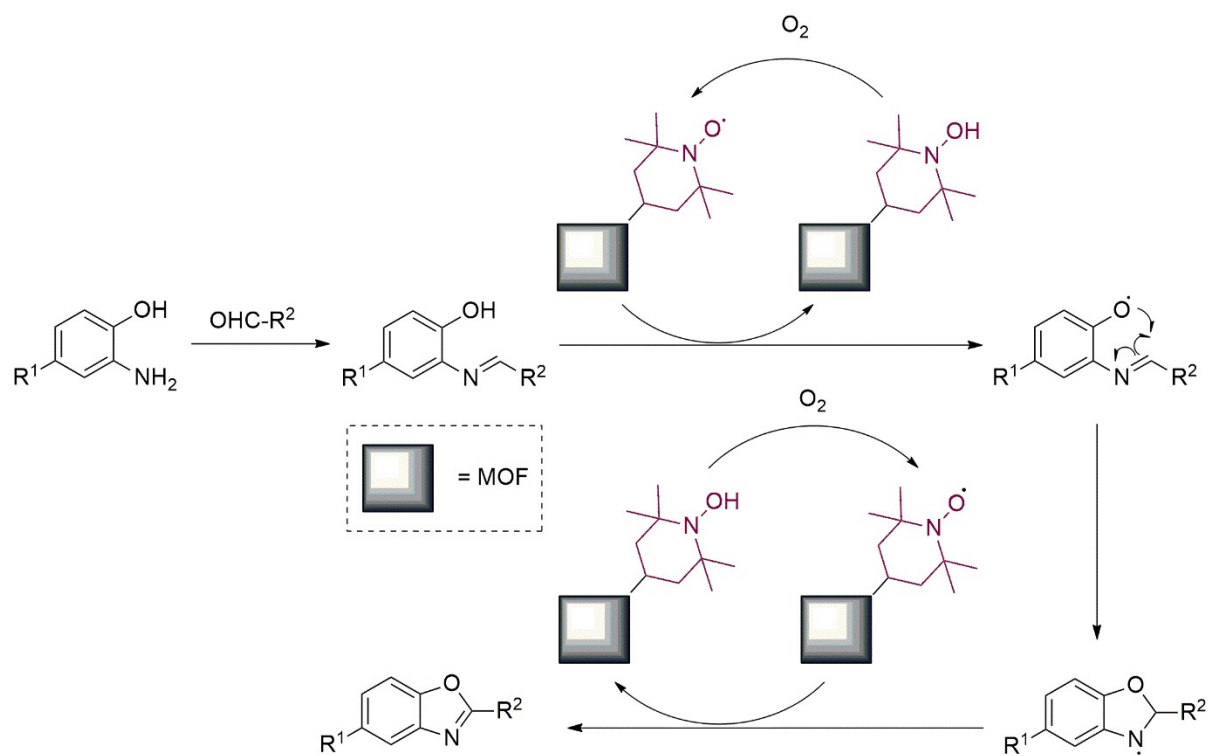

**Fig. S2** A proposed mechanism of MOF-TEMPO-catalyzed aerobic oxidative cyclization toward 2-substituted benzoxazoles.<sup>S3</sup>

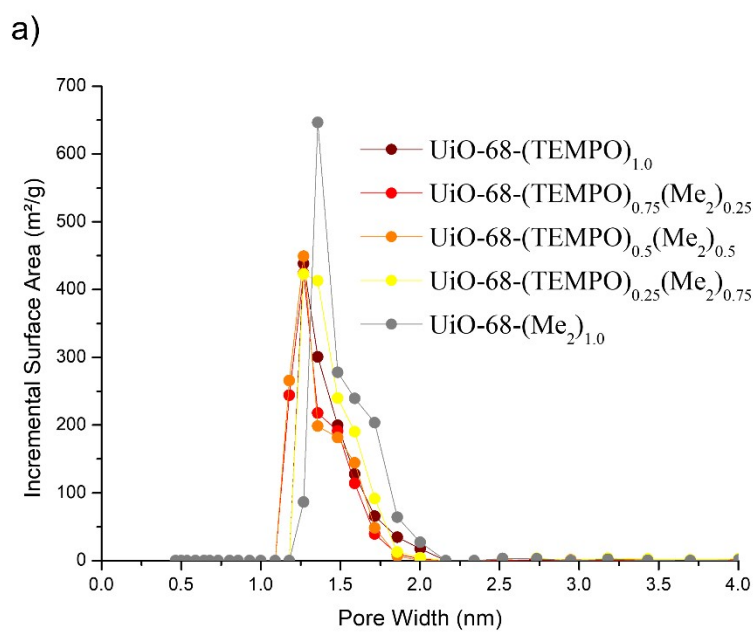

b)

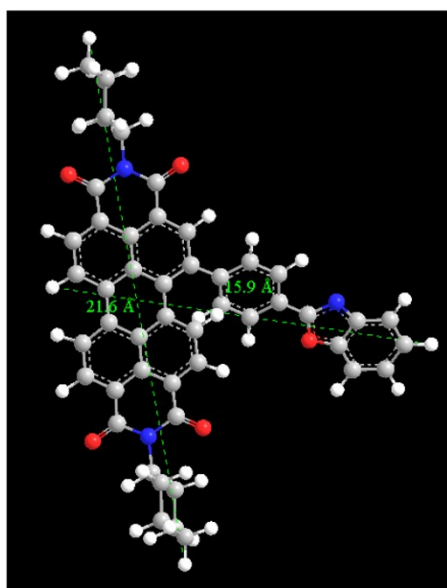

**Fig. S3** (a) DFT pore size distribution of UiO-68-(TEMPO)<sub>x</sub>(Me<sub>2</sub>)<sub>1-x</sub> ( $x = 1.0, 0.75, 0.25,$  and  $0$ ). (b) Molecular size of PDI-benzoxazole (**3ja**) optimized by MM2 calculation.

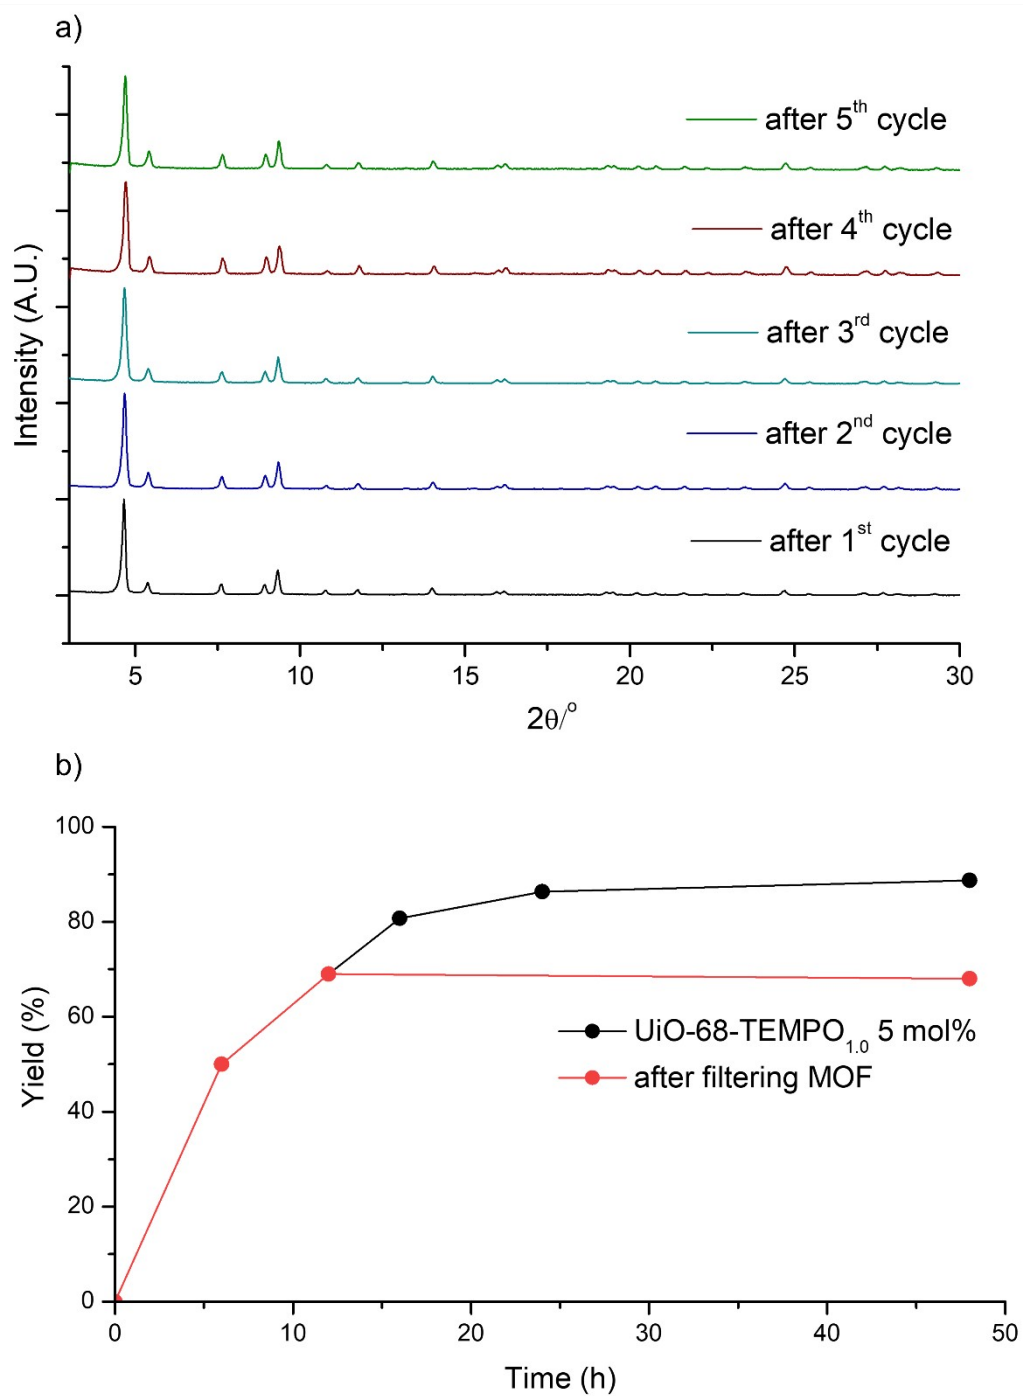

**Fig. S4** (a) PXRD patterns of the recovered UiO-68-(TEMPO)<sub>1.0</sub> from oxidative cyclization. (b) Hot filtration test (12 h) to proof heterogeneity of UiO-68-(TEMPO)<sub>1.0</sub> catalyzed oxidative cyclization.

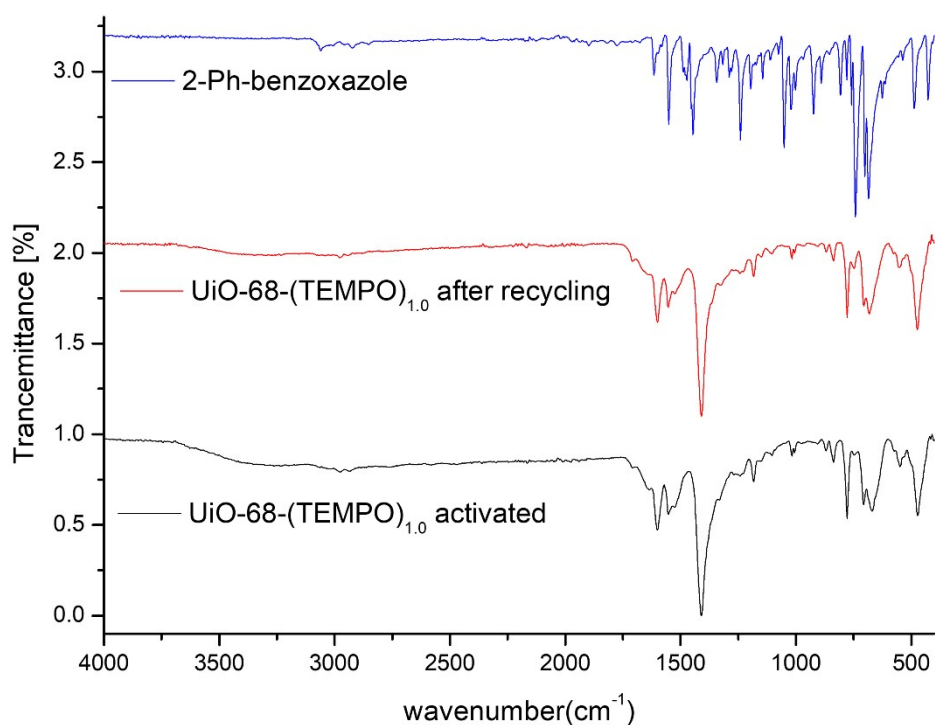

**Fig. S5** FT-IR spectra of the 2-Ph-benzoxazole (**3aa**), UiO-68-(TEMPO)<sub>1.0</sub>, and UiO-68-(TEMPO)<sub>1.0</sub> after 5 cycling from oxidative cyclization.

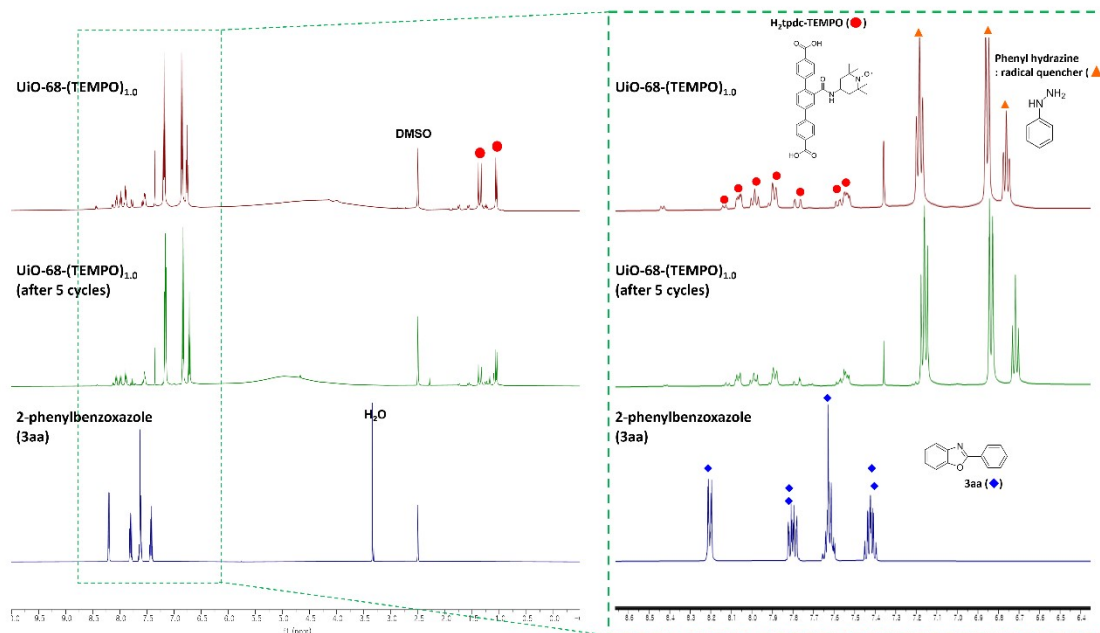

**Fig. S6** <sup>1</sup>H-NMR spectra of the 2-Ph-benzoxazole (**3aa**), UiO-68-(TEMPO)<sub>1.0</sub>, and UiO-68-(TEMPO)<sub>1.0</sub> after 5 cycling from oxidative cyclization. The spectra in the green lined box are the enlargement of the high chemical shift region in the <sup>1</sup>H-NMR spectra (DMSO-*d*<sub>6</sub> was used for NMR solvent).

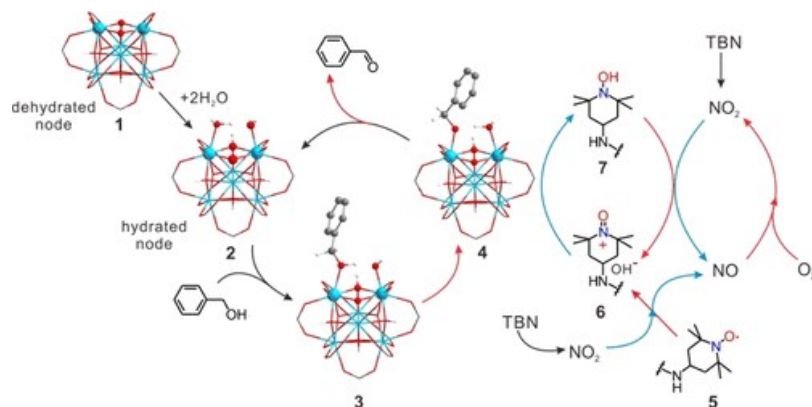

**Fig. S7** Proposed catalytic cycle of oxidation of benzyl alcohol in UiO-68-TEMPO. TEMPO moiety participates the catalytic cycle as TEMPO oxoammonium species in alcohol oxidation.

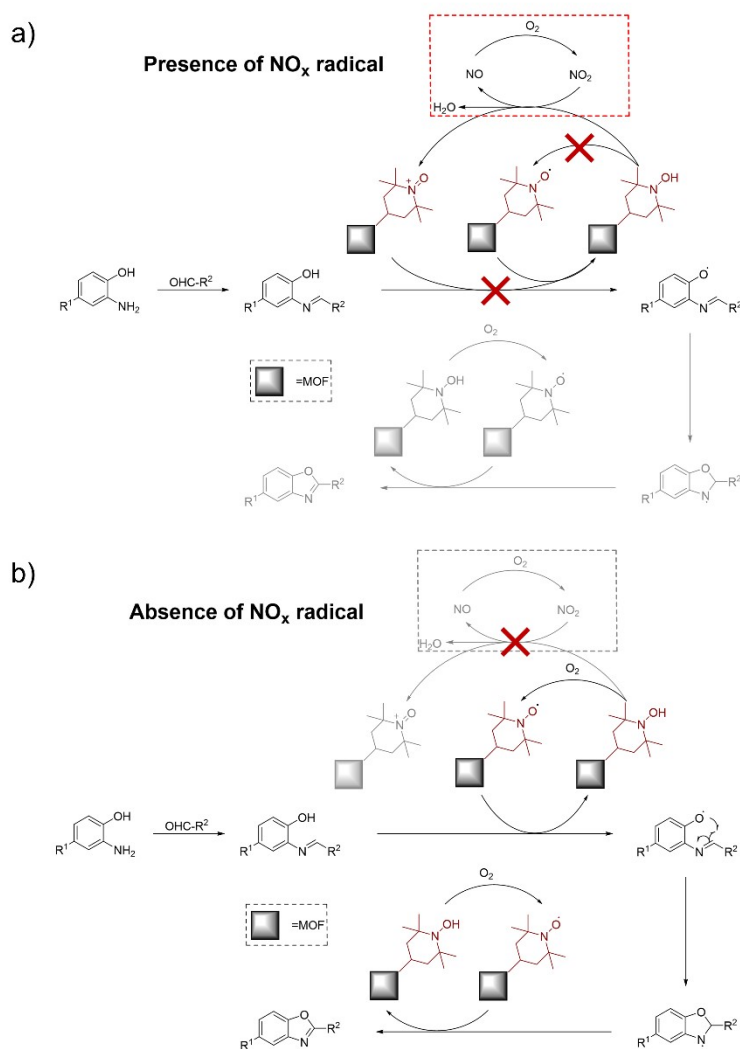

Reprinted with permission from ref. S1 Copyright 2019 American Chemical Society.

**Fig. S8** Proposed catalytic cycle of mechanism of oxidative cyclization presence (a)/absence



(b) of NO<sub>x</sub> species.

**Table S5** Oxidative cyclization with various additives. Reaction conditions: 10 mol% of UiO-68-(TEMPO)<sub>1.0</sub>, 100 °C, reaction time 24 h, *p*-xylene solvent system, and additives.

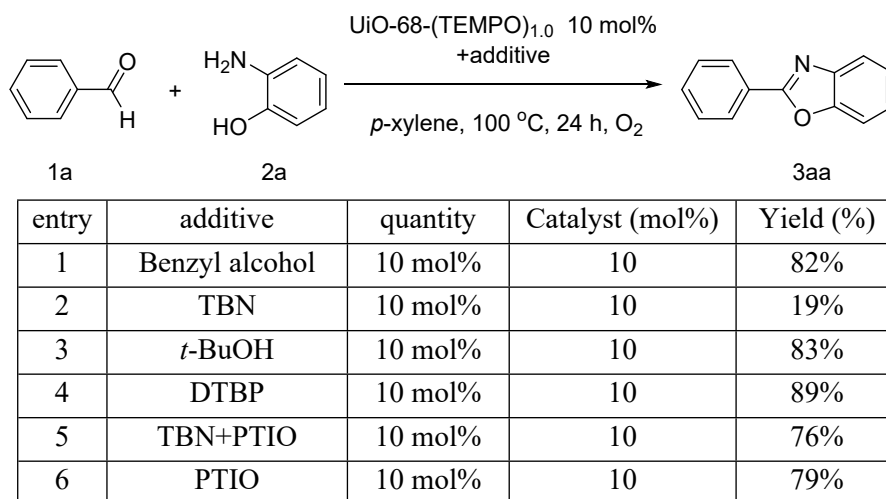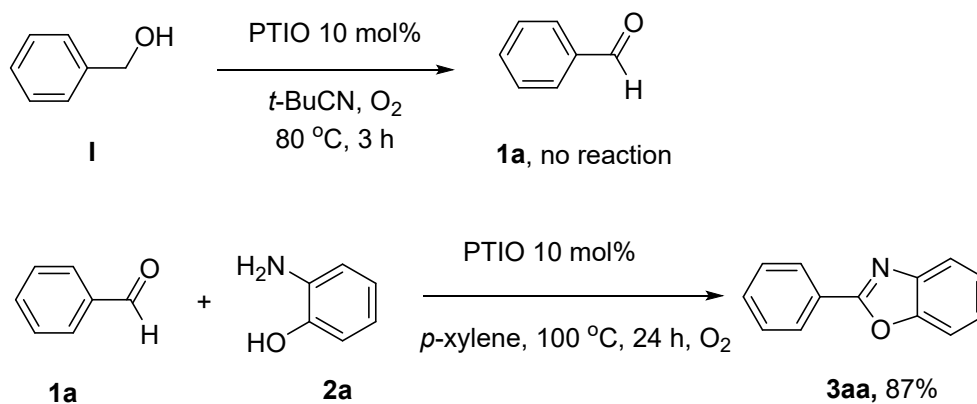

**Fig. S9** Catalytic activity of PTIO for the aerobic oxidation of **I** to **1a** and oxidative cyclization between **1a** and **2a**.

## References for ESI

- S1. J.-L. Zhuang, X.-Y. Liu, Y. Zhang, C. Wang, H.-L. Mao, J. Guo, X. Du, S.-B. Zhu, B. Ren, and A. Terfort, *ACS Appl. Mater. Interfaces*, 2019, **11**, 3034-3043.
- S2. R. El-Berjawi, and P. Hudhomme, *Dye. Pigments*, 2018, **159**, 551-556.
- S3. Y.-X. Chen, L.-F. Qian, W. Zhang, and B. Han, *Angew. Chem. Int. Ed.*, 2008, **47**, 9330-9333.
- S4. R. R. Putta, S. Chun, S. H. Choi, S. B. Lee, D.-C. Oh and S. Hong, *J. Org. Chem.*, 2020, **85**, 15396-15405.
- S5. C.-Y. Wang, R. Tian, J.-X. Li and Y.-M. Zhu, *J. Org. Chem.*, 2023, **88**, 3378-3385.
- S6. P. W. Siu, Z. J. Brown, O. K. Farha, J. T. Hupp and K. A. Scheidt, *Chem. Commun.*, 2013, **49**, 10920-10922.
- S7. H. Zhang, X.-W. Gao, L. Wang, X. Zhao, Q.-Y. Li and X.-J. Wang, *CrystEngComm*, 2019, **21**, 1358-1362.
- S8. C. M. McGuirk, M. J. Katz, C. L. Stern, A. A. Sarjeant, J. T. Hupp, O.K. Farha and C. A. Mirkin, *J. Am. Chem. Soc.*, 2015, **137**, 919-925.
- S9. K. M. Zwolinski and M. J. Chmielewski, *ACS Appl. Mater. Interfaces*, 2017, **9**, 33956-33967.
- S10. S.-Y. Han, D.-L. Pan, H. Chen, X.-B. Bu, Y.-X. Gao, H. Gao, Y. Tian, G. S. Li, G. Wang, S.-L. Cao, C.-Q. Wan and G.-C. Guo, *Angew. Chem. Int. Ed.*, 2018, **57**, 9864-9869.
- S11. W. F. Bailey, J. M. Bobbitt and K. B. Wiberg, *J. Org. Chem.*, 2007, **72**, 4504-4509
- S12. D. Leifert and A. Studer, *Chem. Rev.*, 2023, **123**, 16, 10302-10380
- S13. X. He, Z. Shen, W. Mo, N. Sun, B. Hu and X. Hu, *Adv. Synth. Catal.*, 2009, **351**, 89-92.
- S14. A. Dahiya, A. K. Sahoo, T. Alam and B. K. Patel, *Chem. -Asian J.*, 2019, **14**, 4454-4492
- S15. S. Kim, H.-E. Lee, J.-M. Suh, M. H. Lim and M. Kim, *Inorg. Chem.*, 2020, **59**, 17573-17582.
- S16. Y. Xu, H. Li, S. Xu, X. Liu, J. Lin, H. Chen and Z. Yuan, *J. Med. Chem.*, 2022, **65**, 424-435.
- S17 U. Samuni, Y. Samuni and S. Goldstein, *J. Am. Chem. Soc.*, 2010, **132**, 8428-8432.
- S18. T. Akaike, M. Yoshida, Y. Miyamoto, K. Sato, M. Kohno, K. Sasamoto, K. Miyazaki, S. Ueda and H. Maeda, *Biochemistry*, 1993, **32**, 827-832.

# APPENDIX I

$^1\text{H}$  NMR,  $^{13}\text{C}$  NMR, and FT-IR of the  
obtained molecules

Ph-Br<sub>2</sub>-TEMPO (\* from phenylhydrazine)

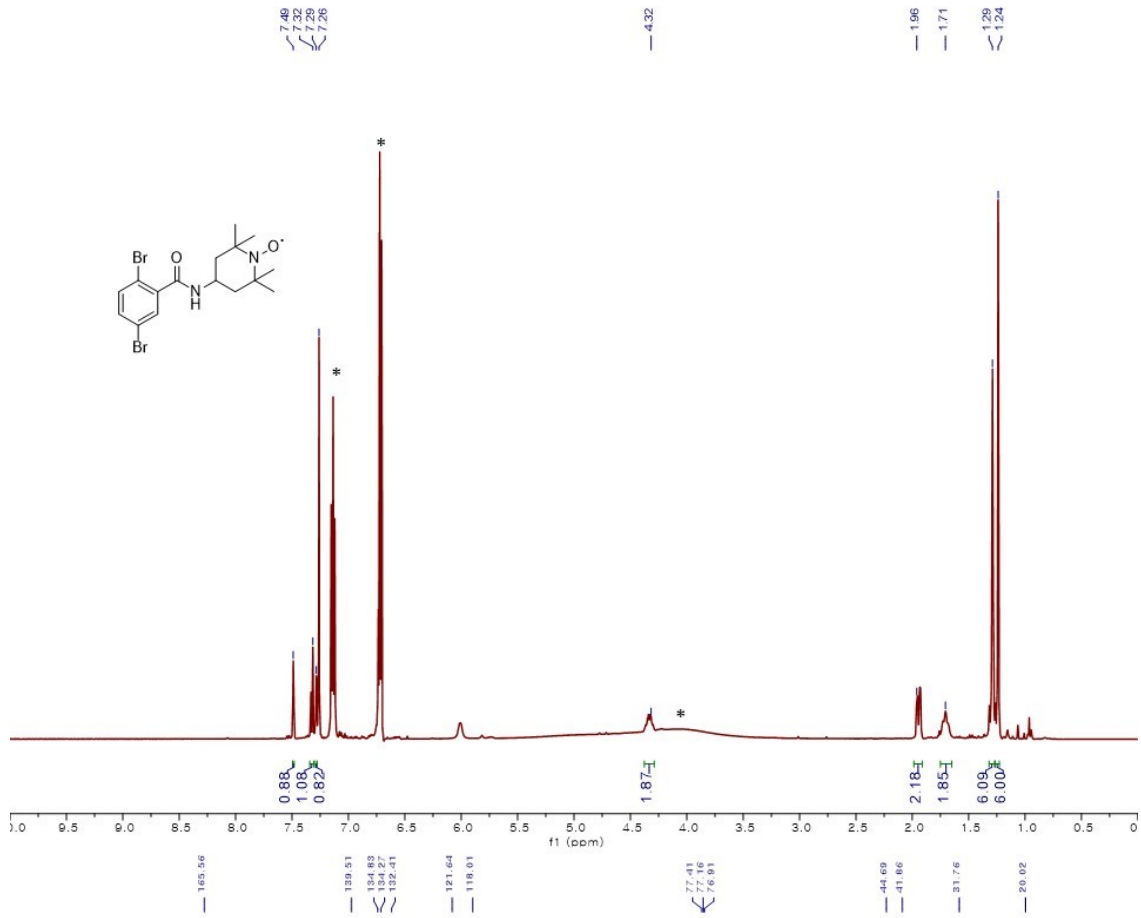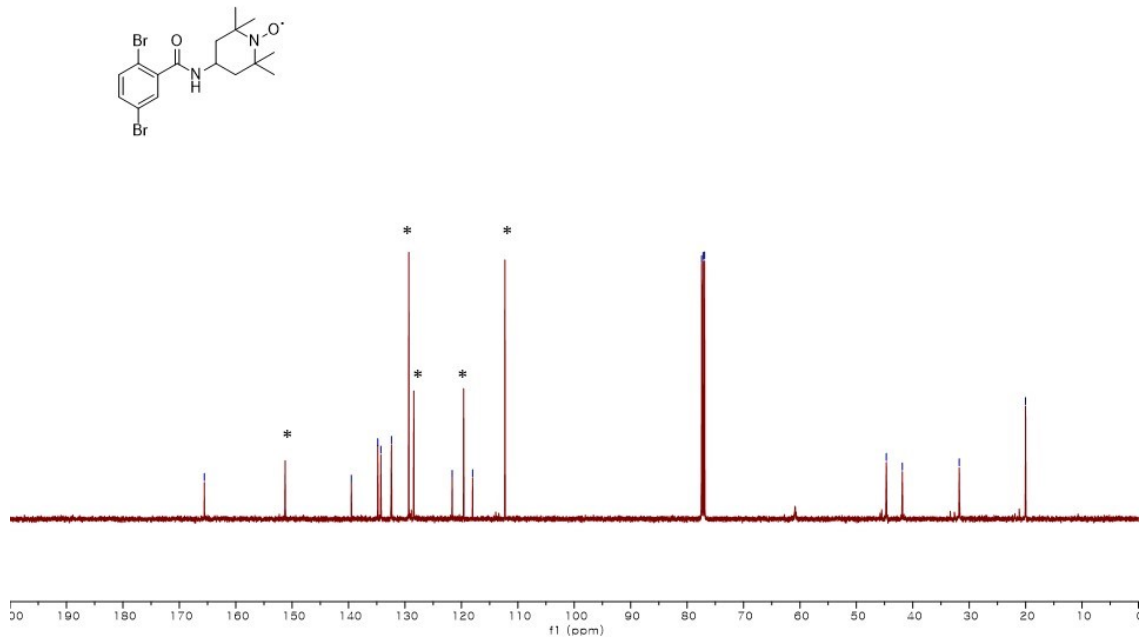

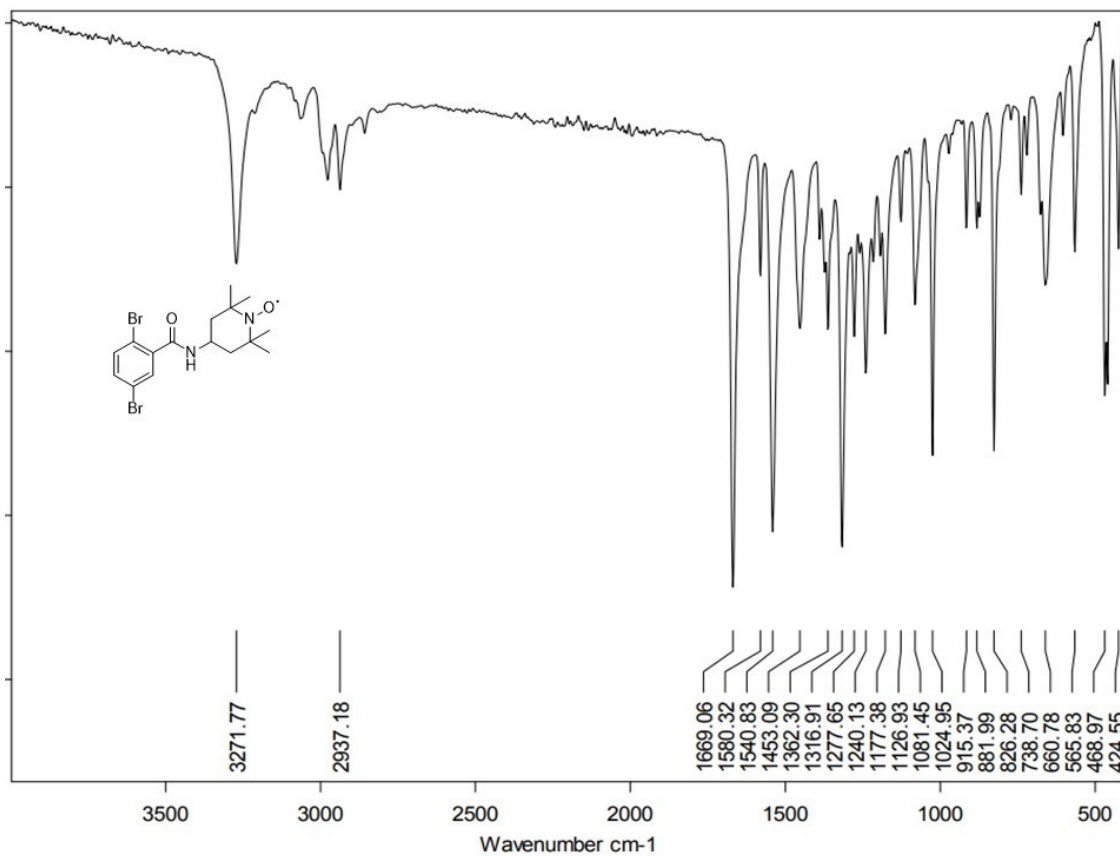



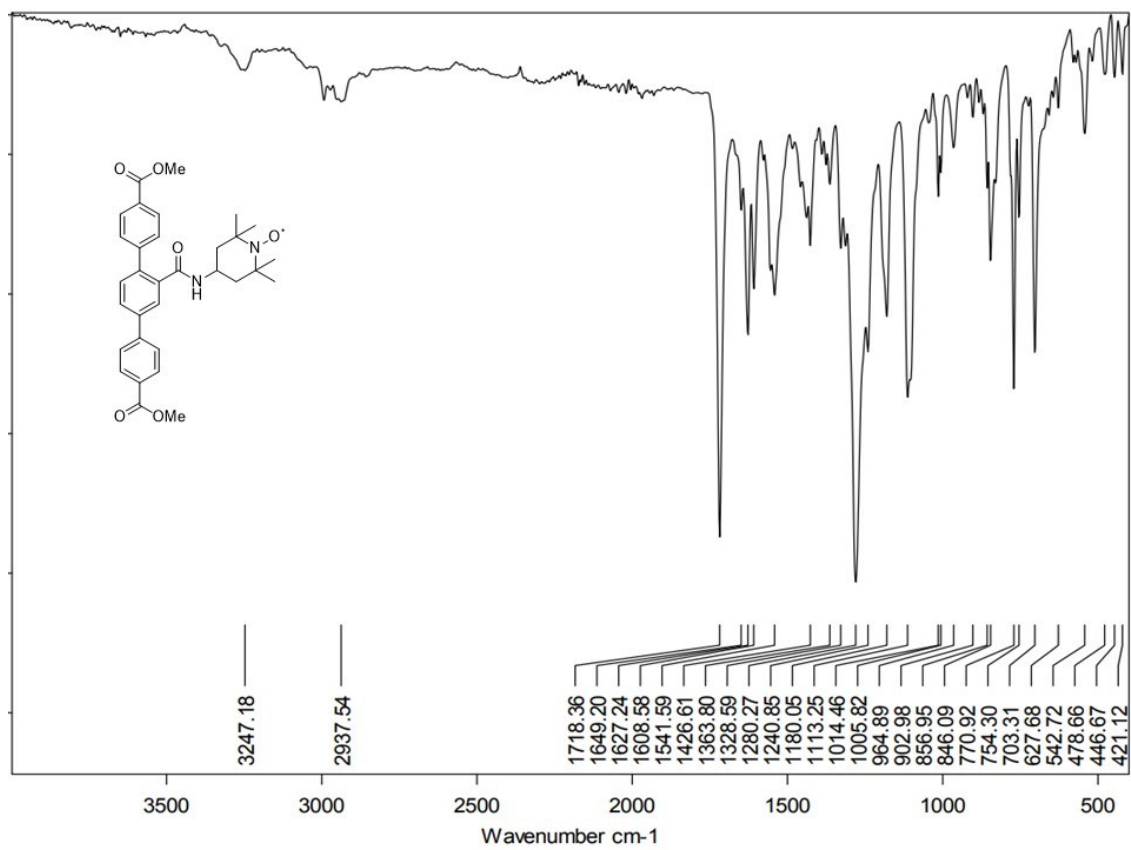





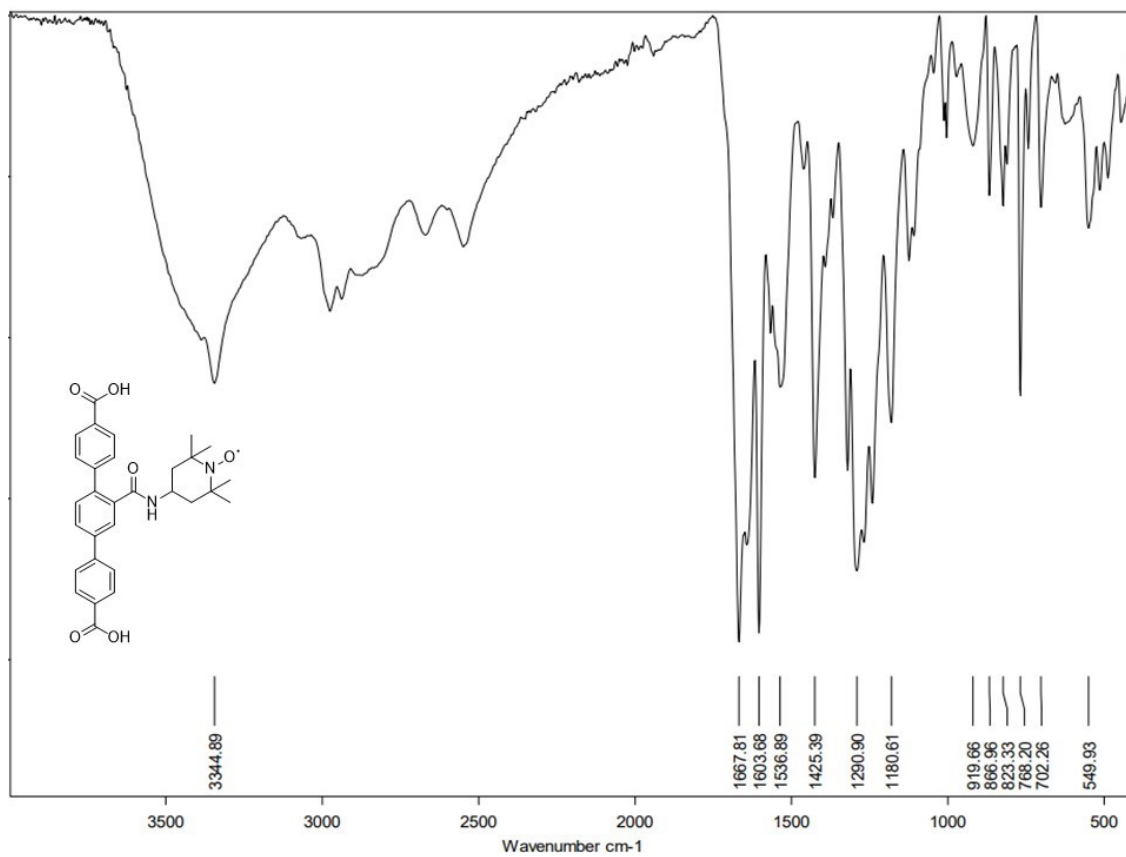

# 2-Phenylbenzoxazole (3aa)

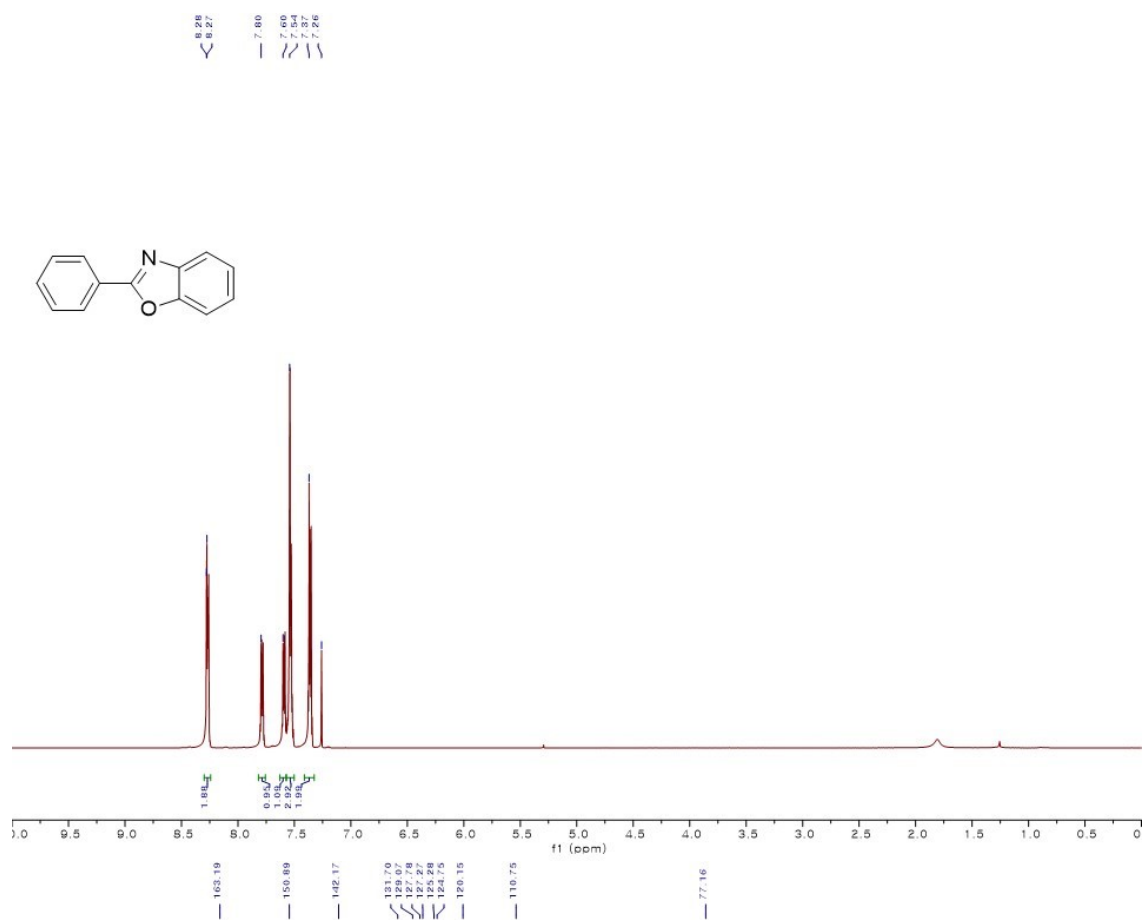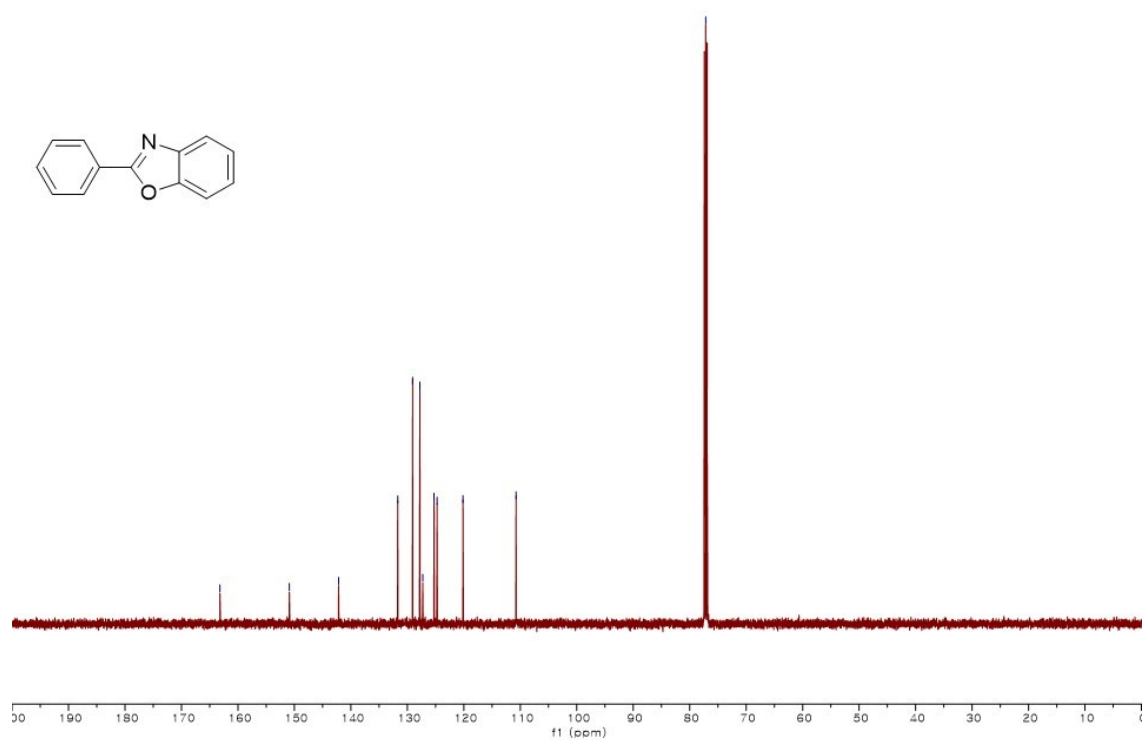

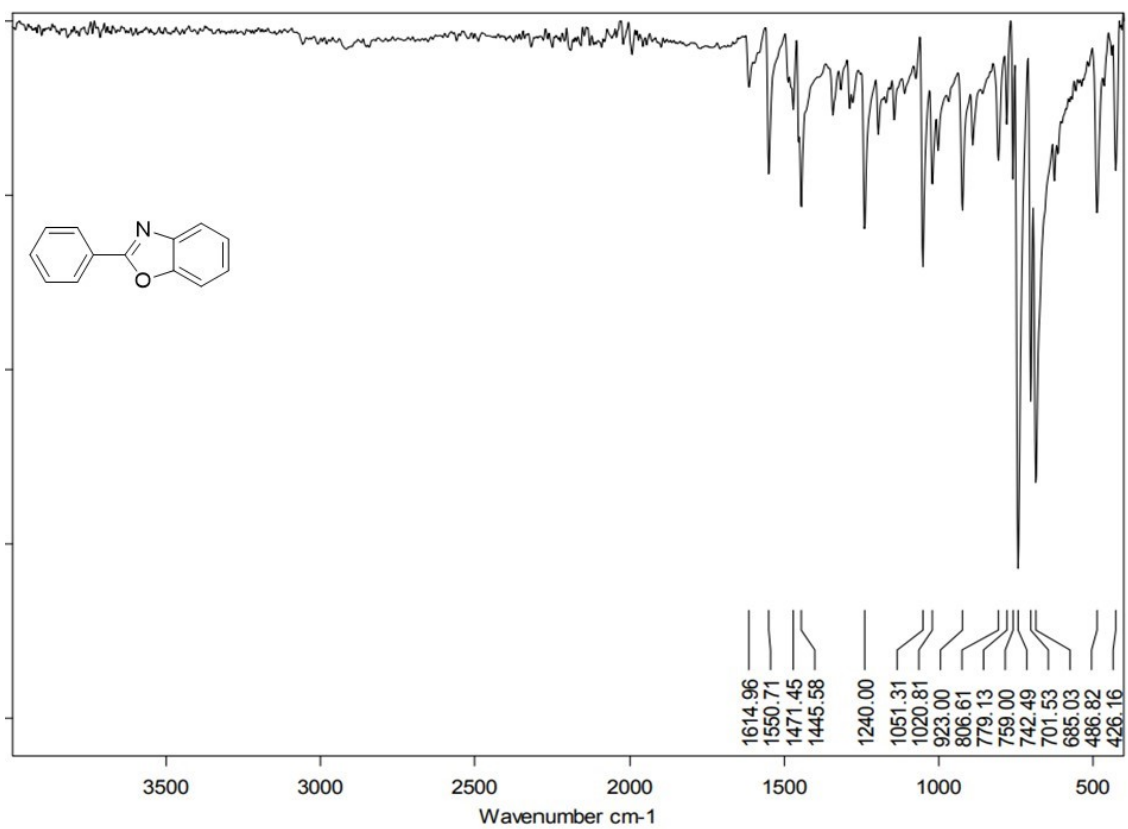

2-(*p*-Tolyl)benzoxazole (**3ba**)

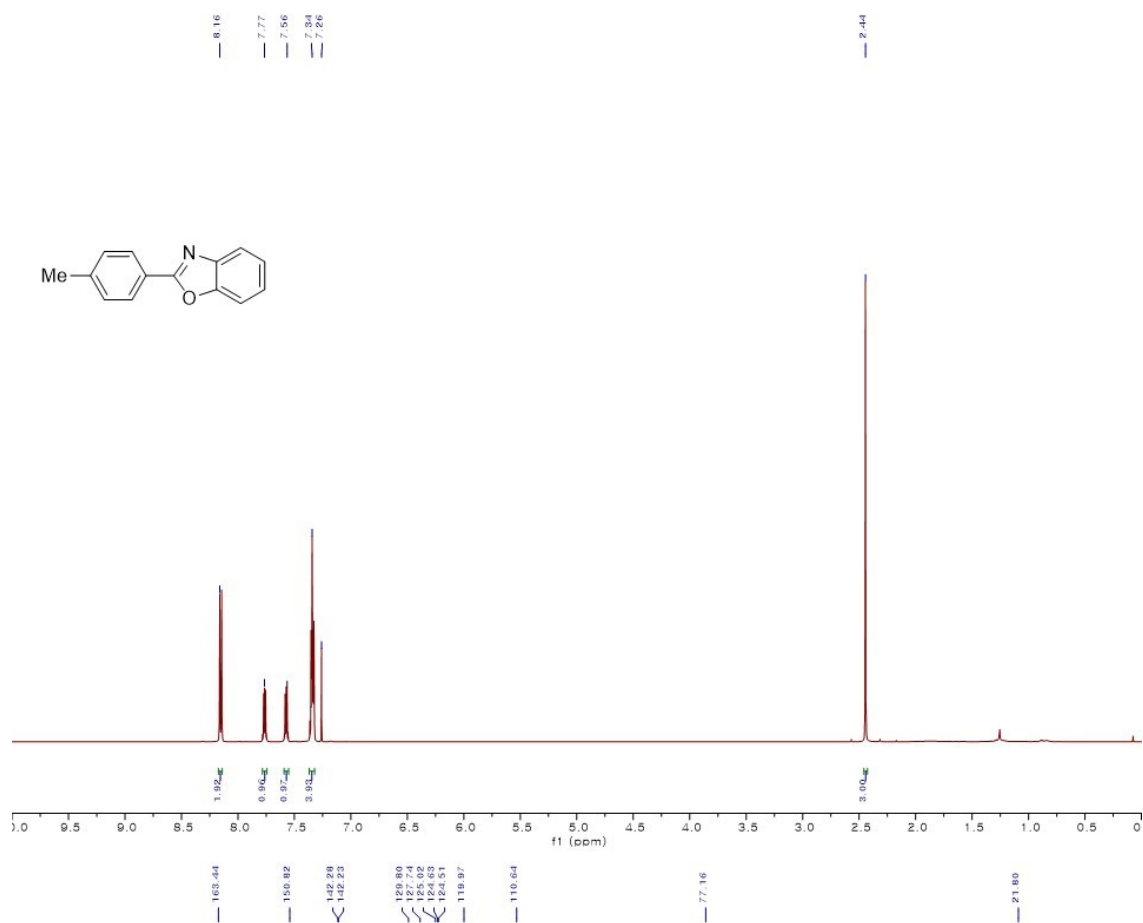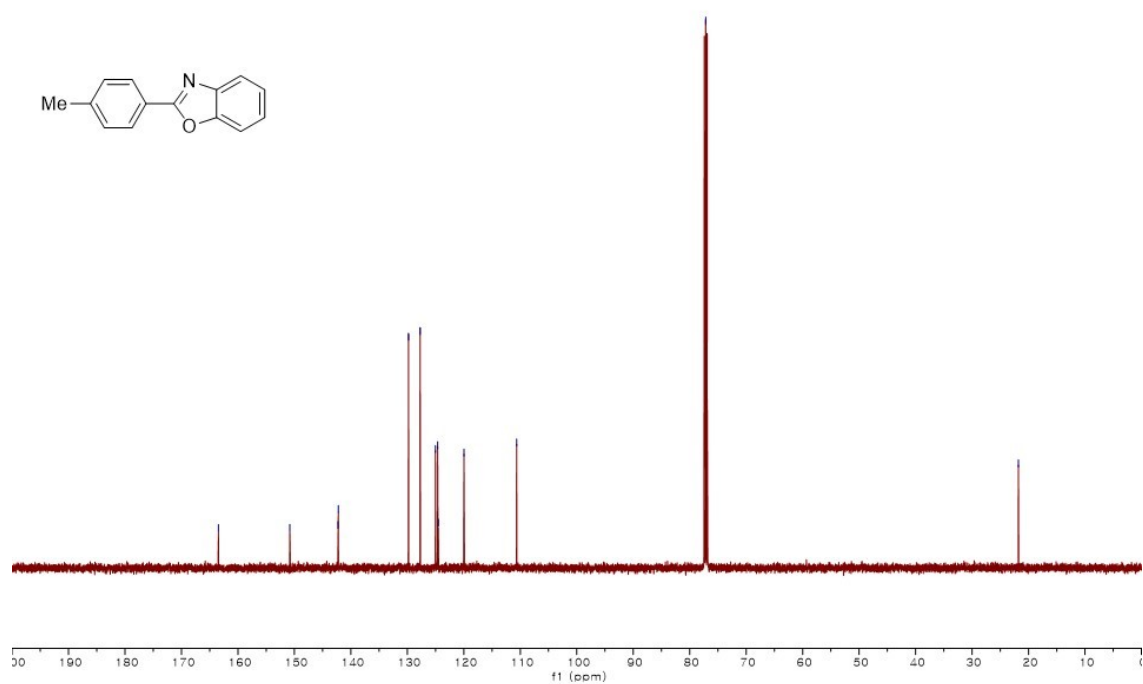

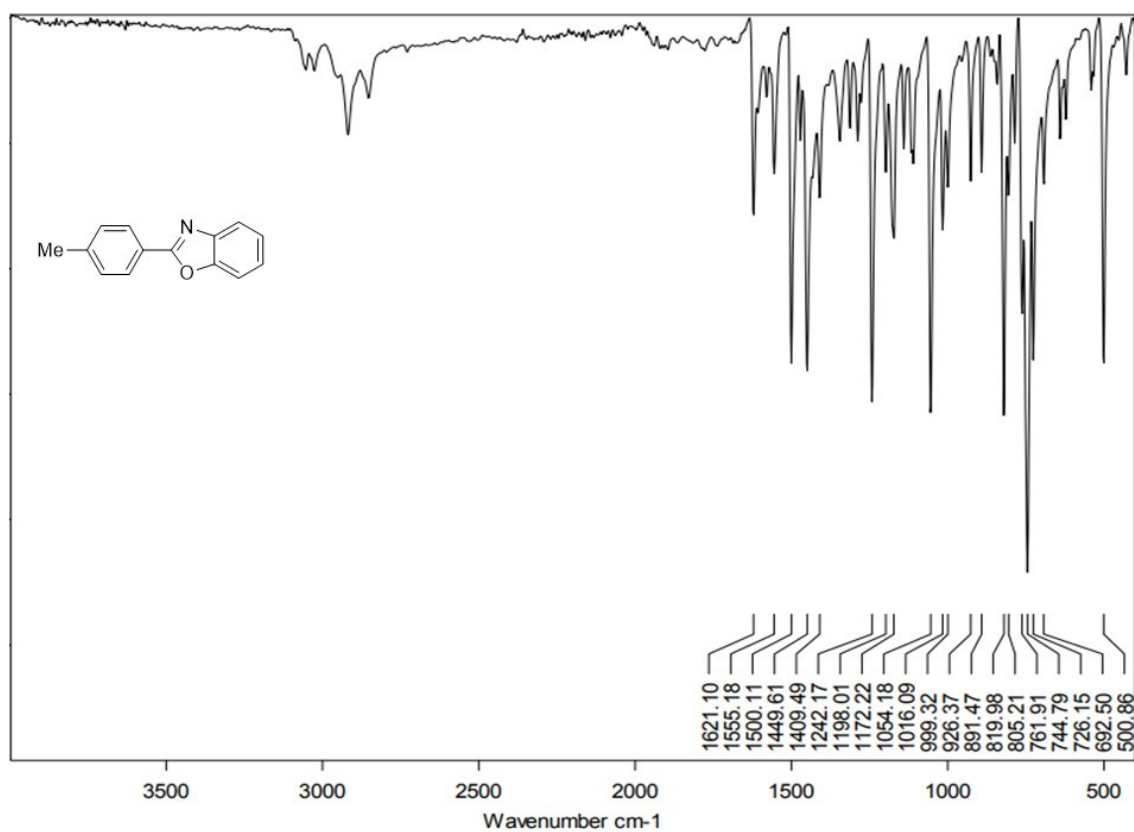

2-(*m*-Tolyl)benzoxazole (**3ca**)

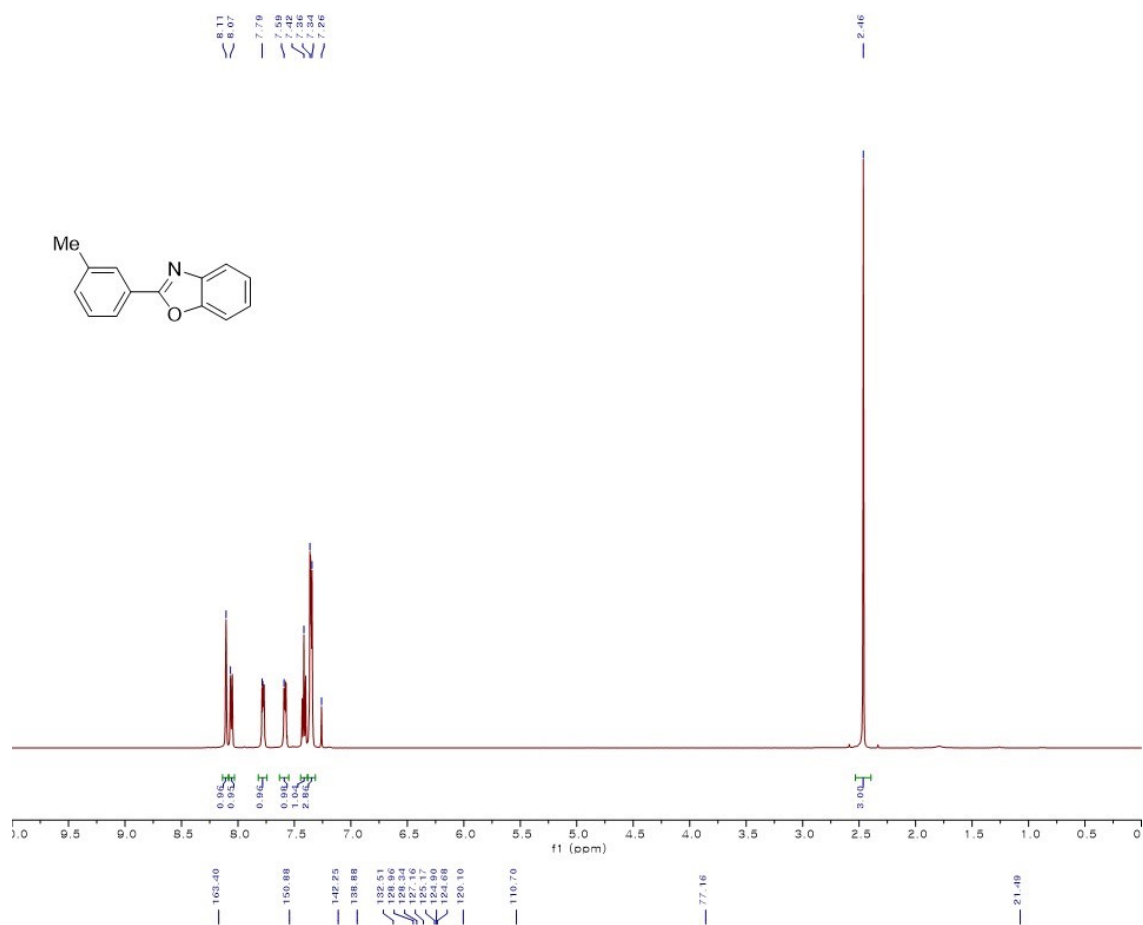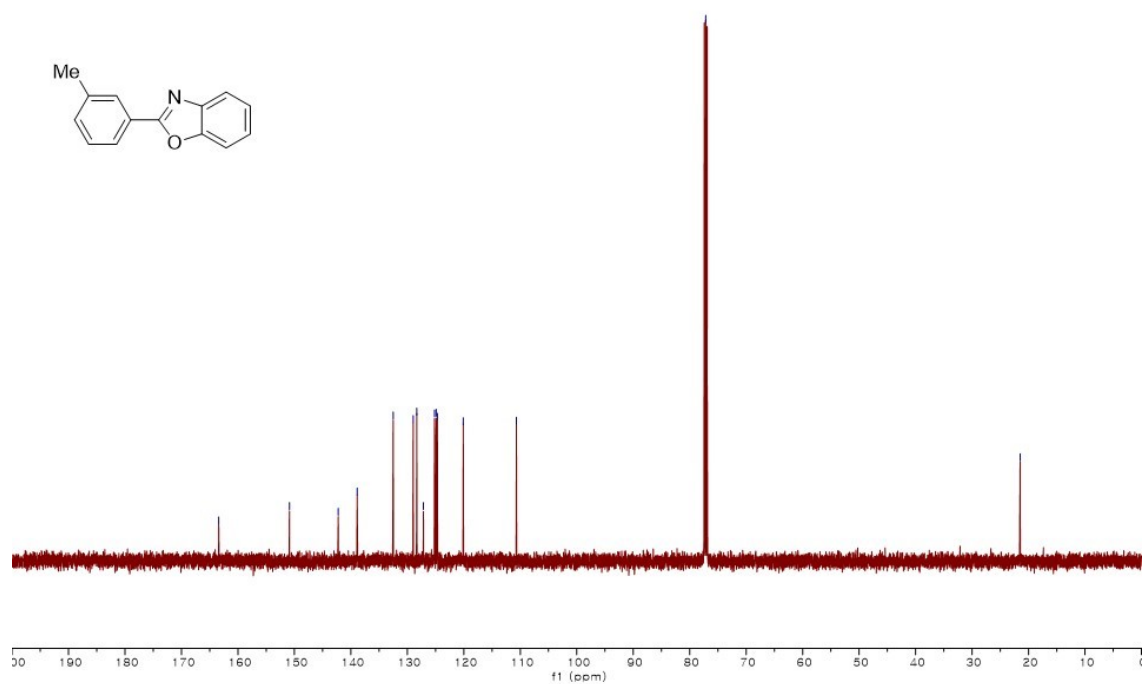

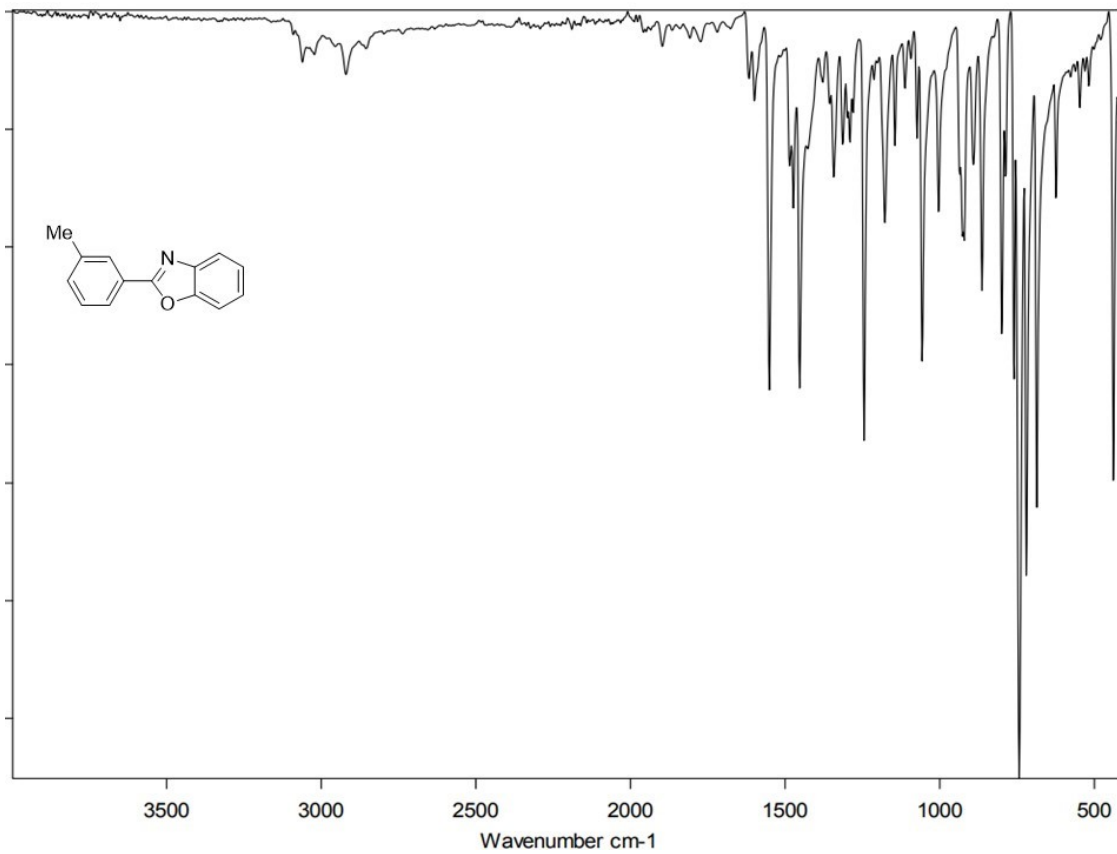

2-(*o*-Tolyl)benzoxazole (**3da**)

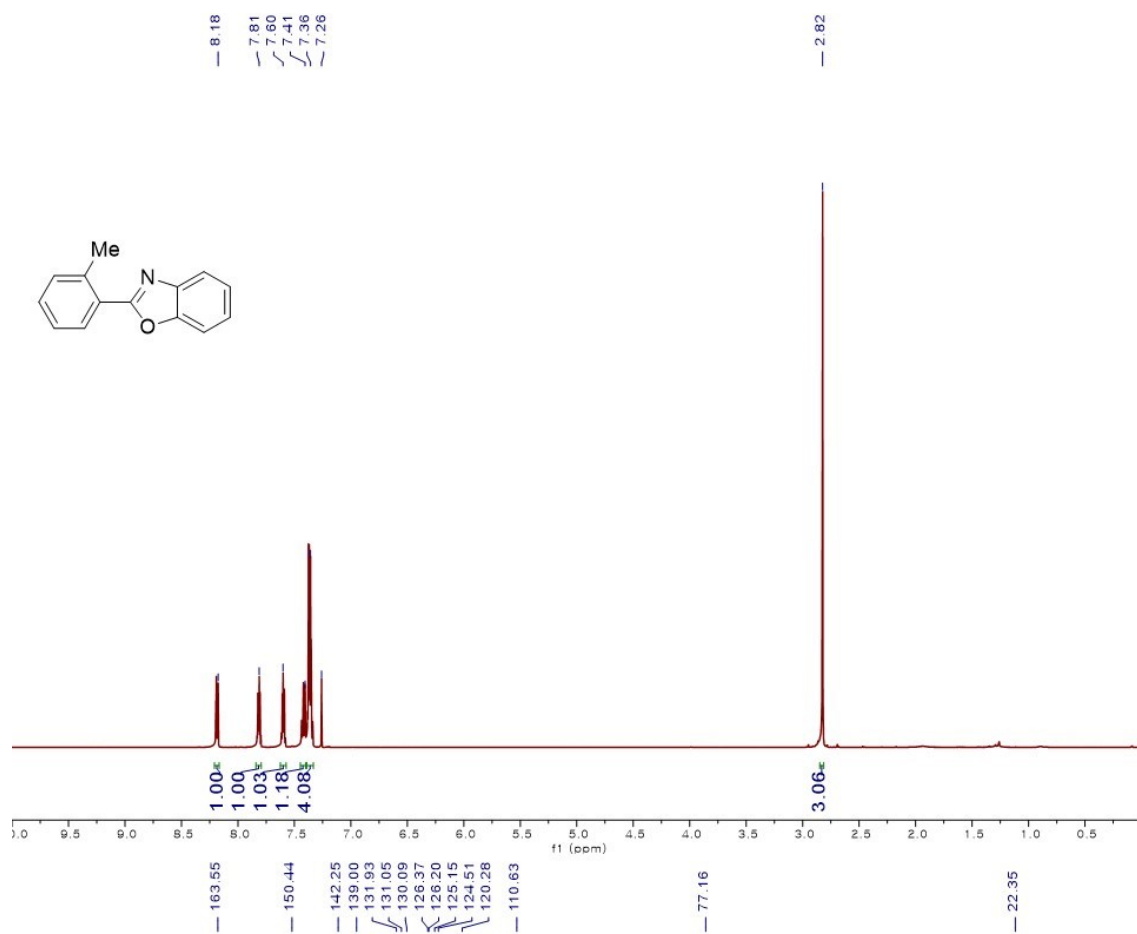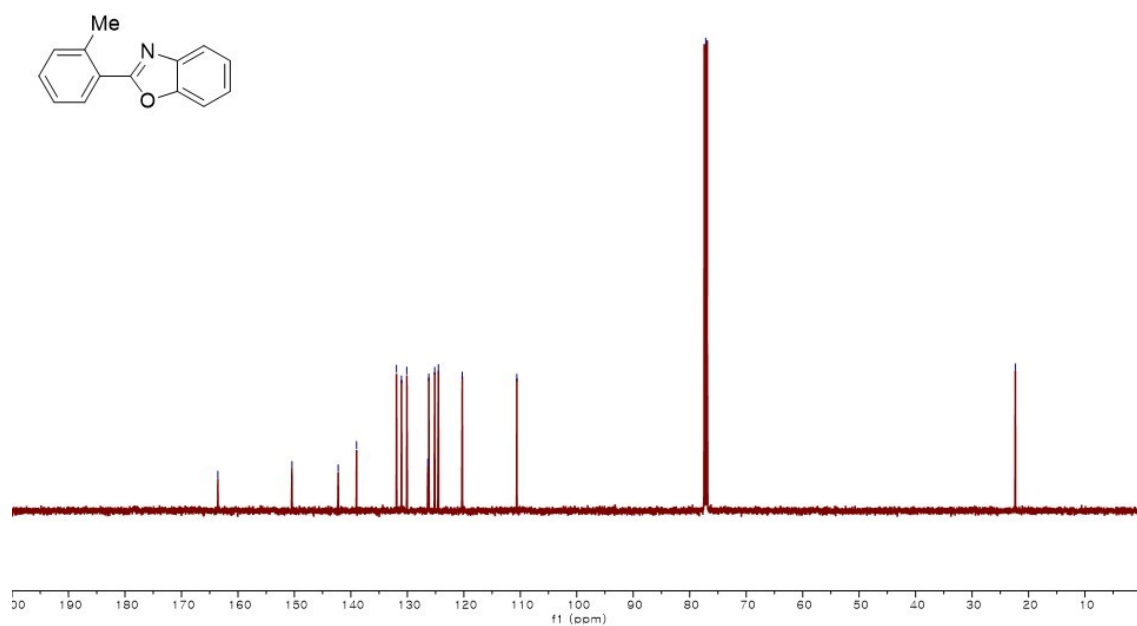



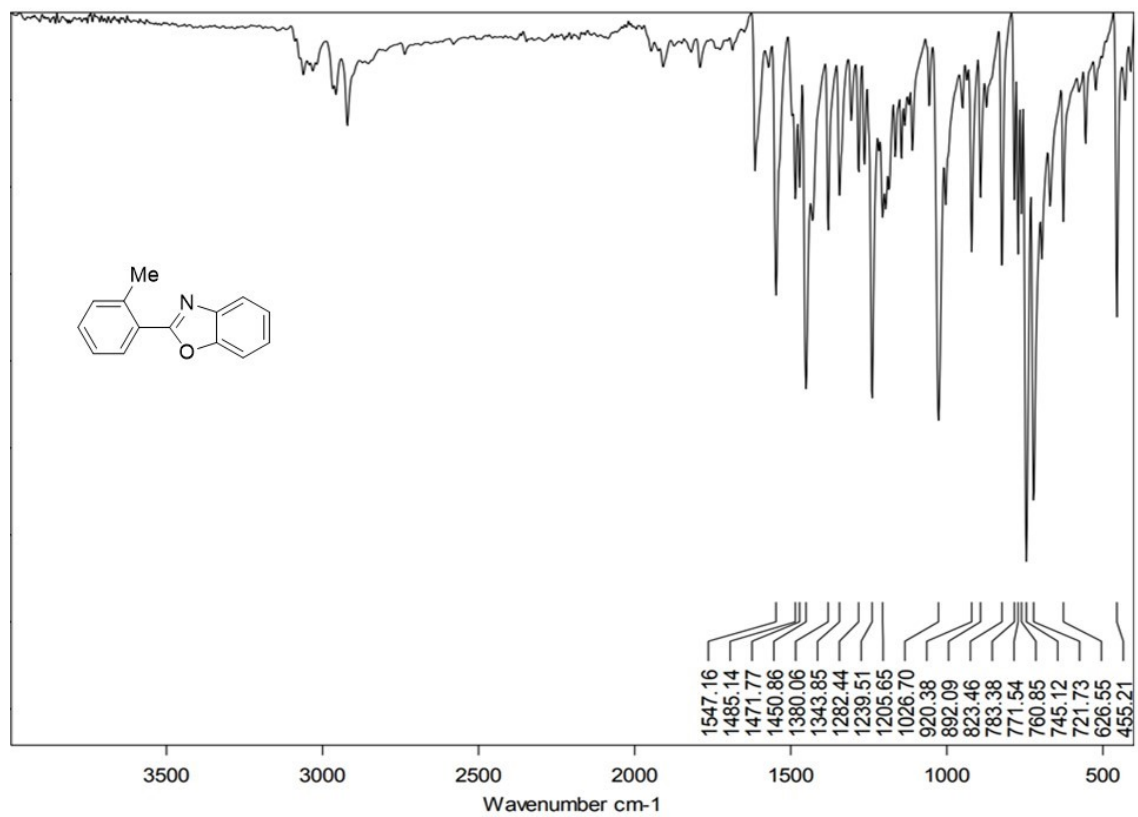

2-(4-Methoxyphenyl)benzoxazole (3ea)

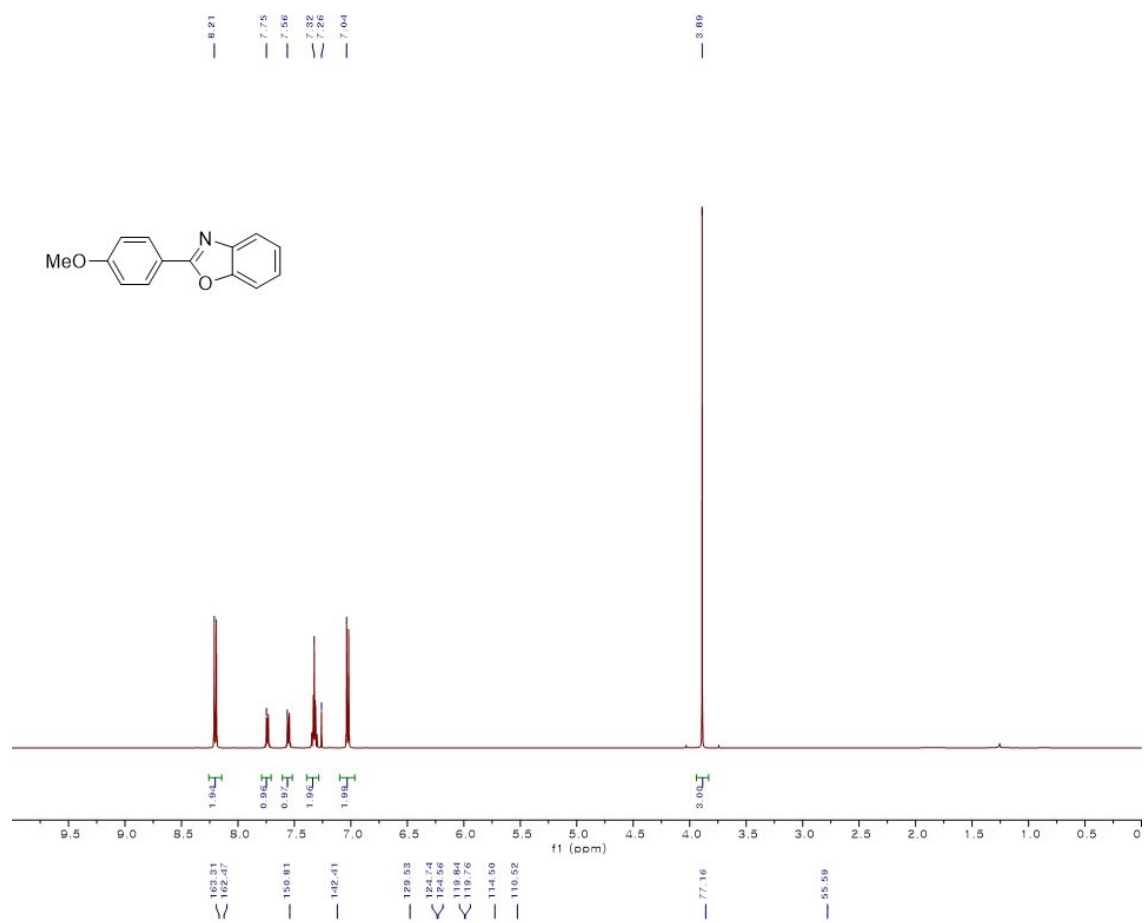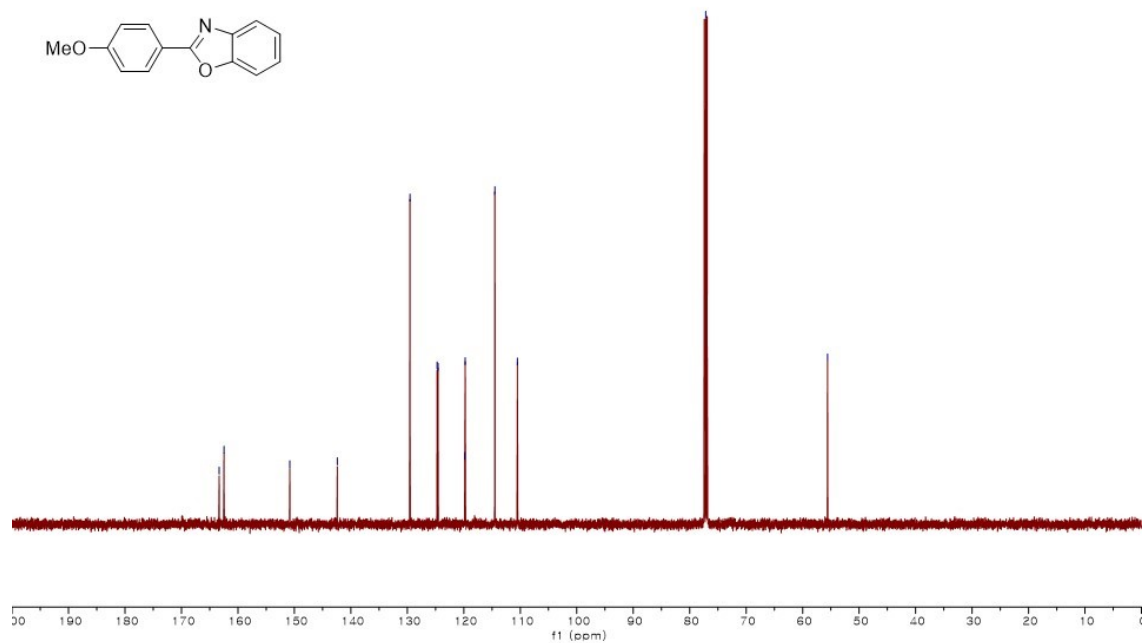

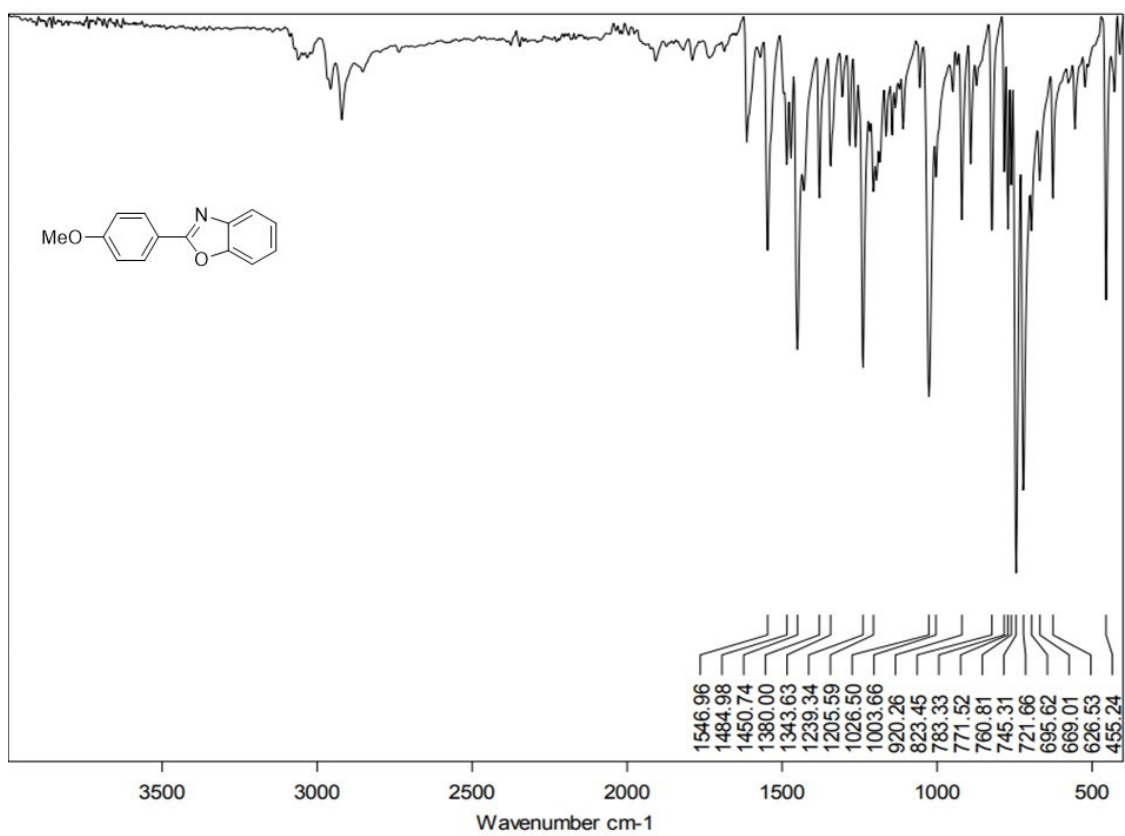

2-(4-Chlorophenyl)benzoxazole (3fa)

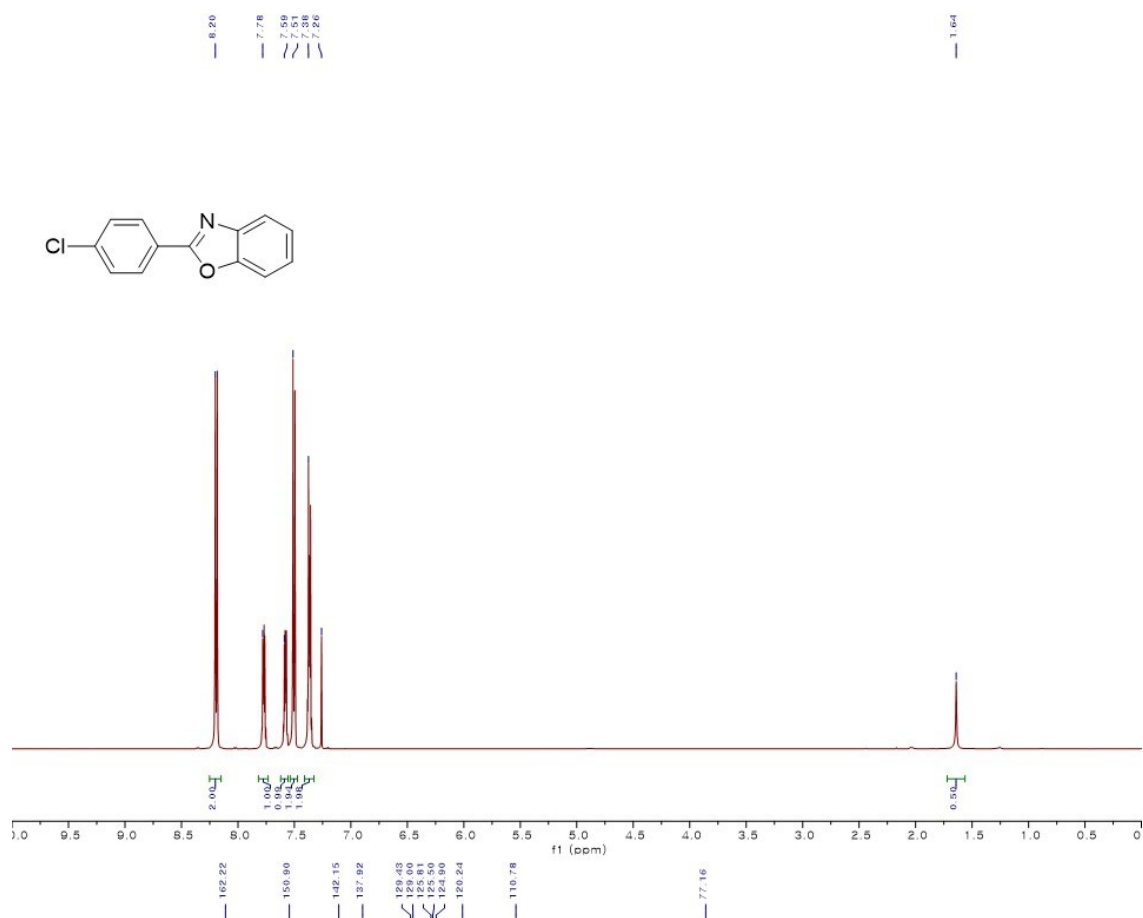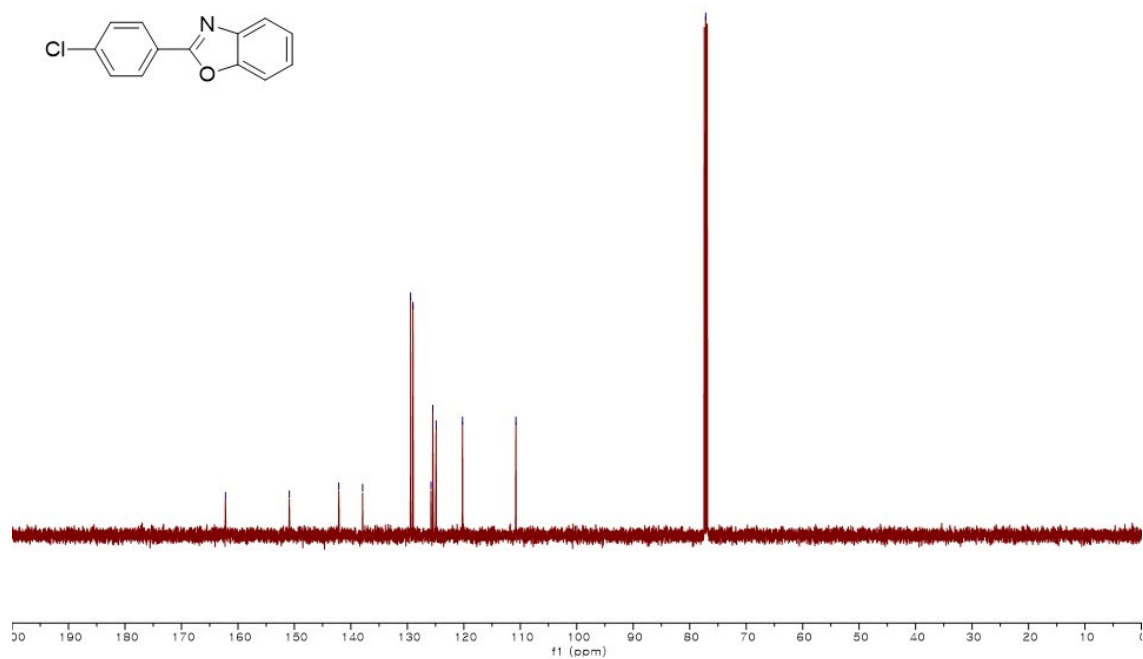

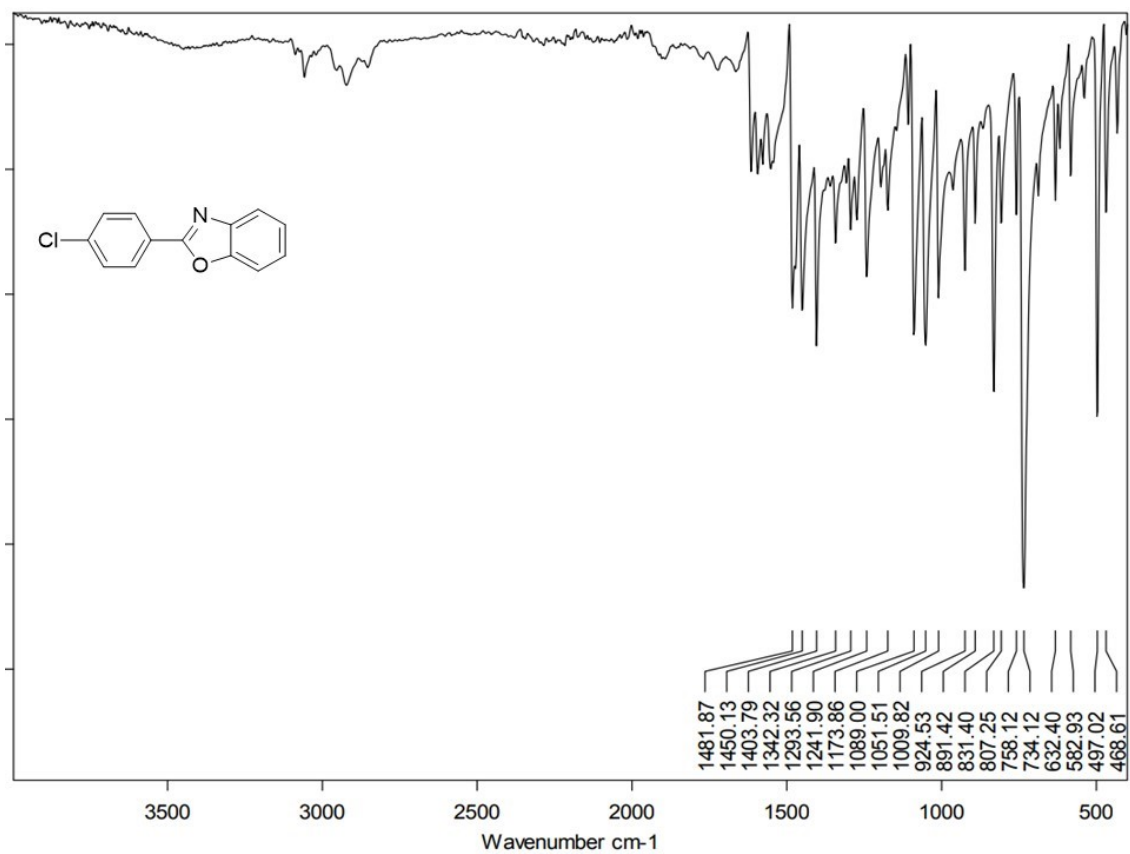

4-(Benzoxazol-2-yl)benzonitrile (**3ga**)

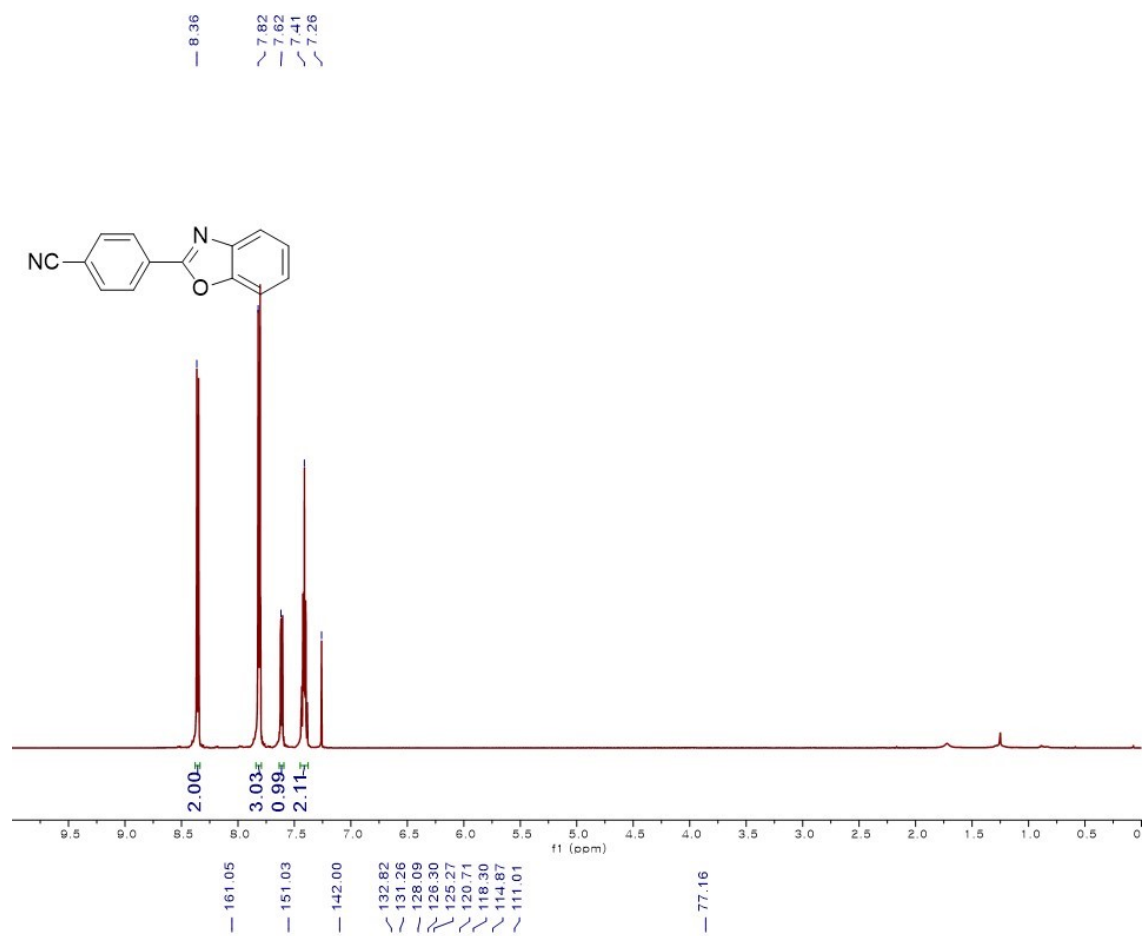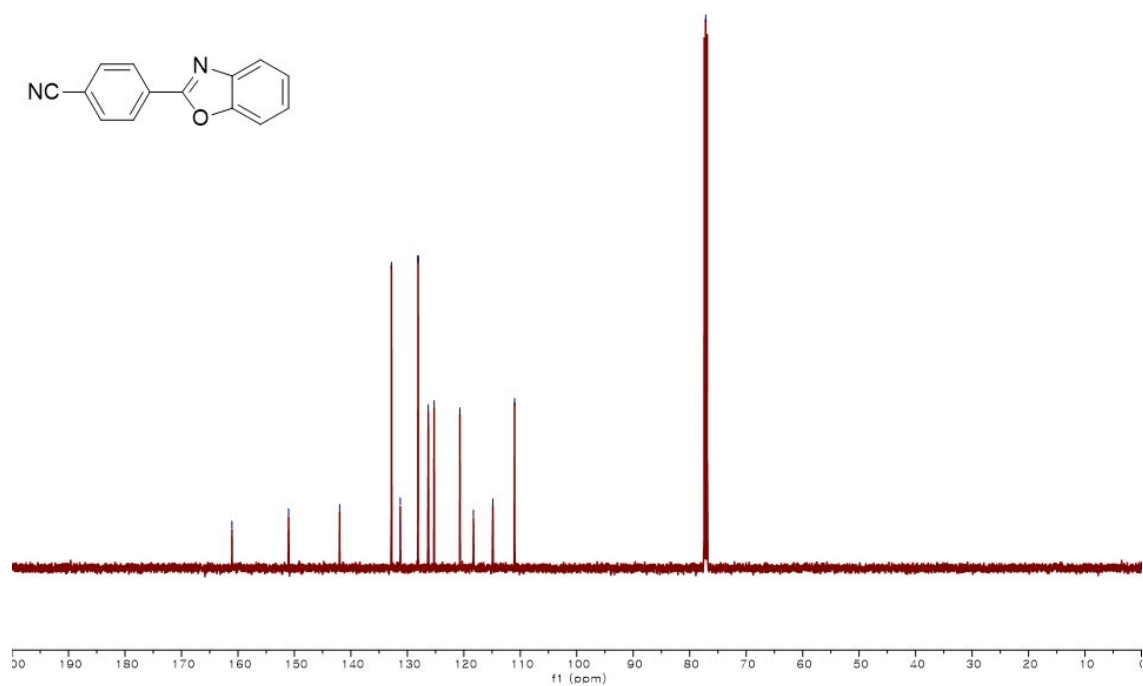

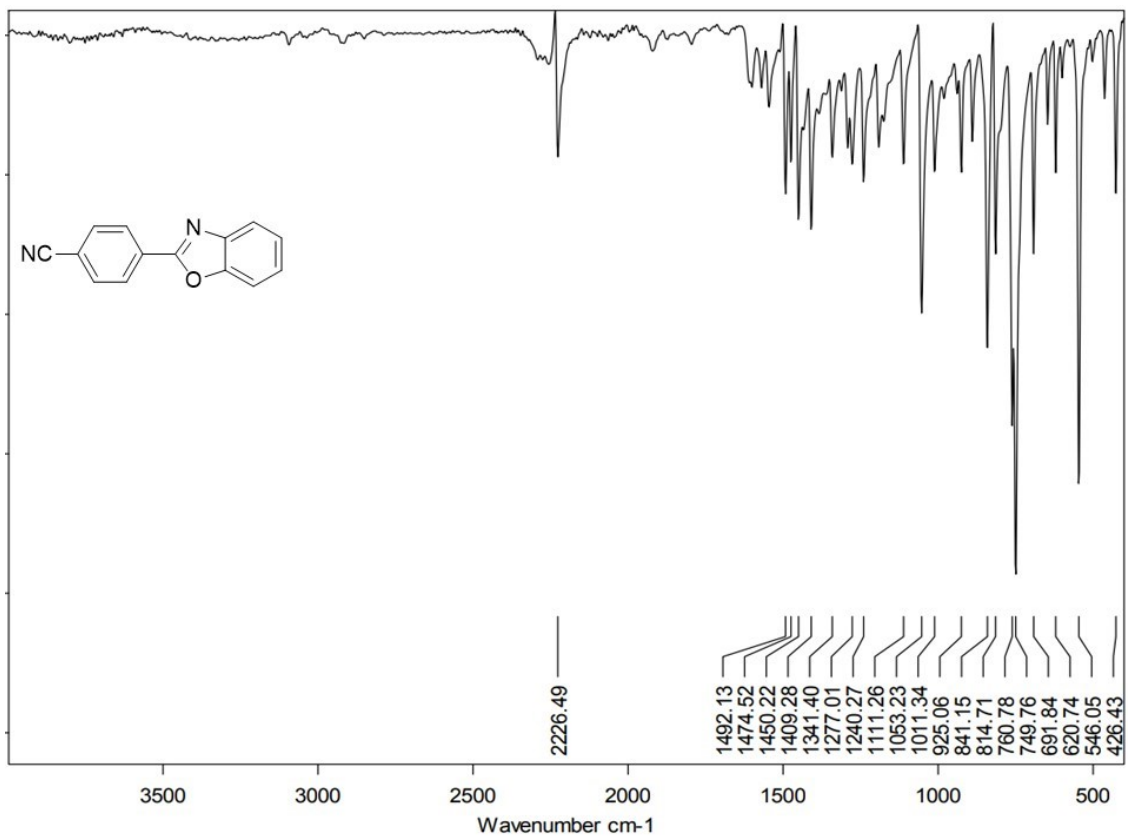

# 2-(4-Nitrophenyl)benzoxazole (3ha)

8.44  
8.10  
7.84  
7.63  
7.43  
7.26

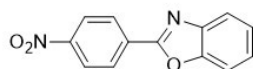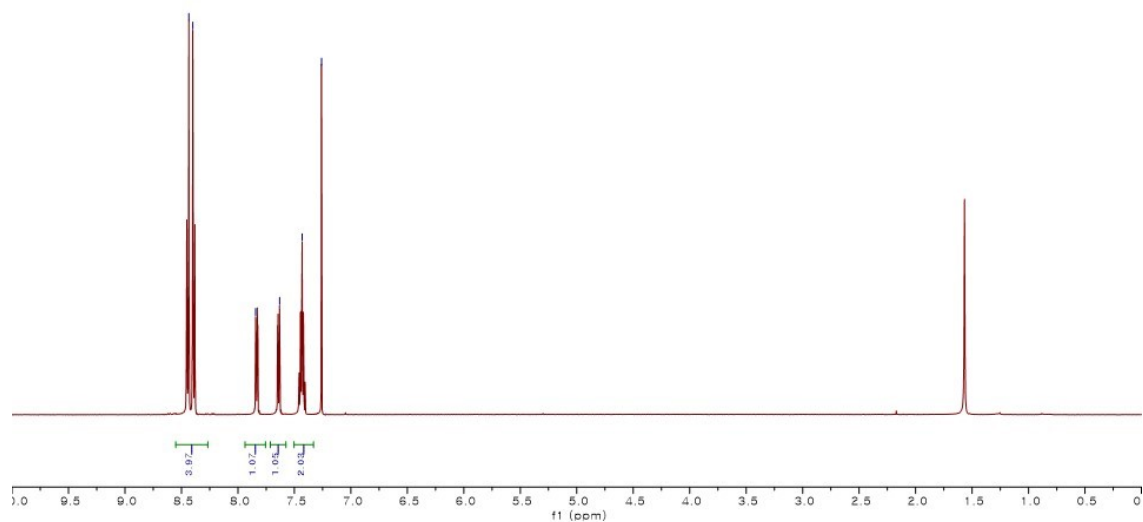

160.81  
153.55  
146.55  
142.07  
132.86  
128.55  
125.38  
124.38  
120.64  
111.10

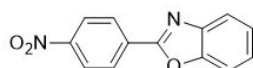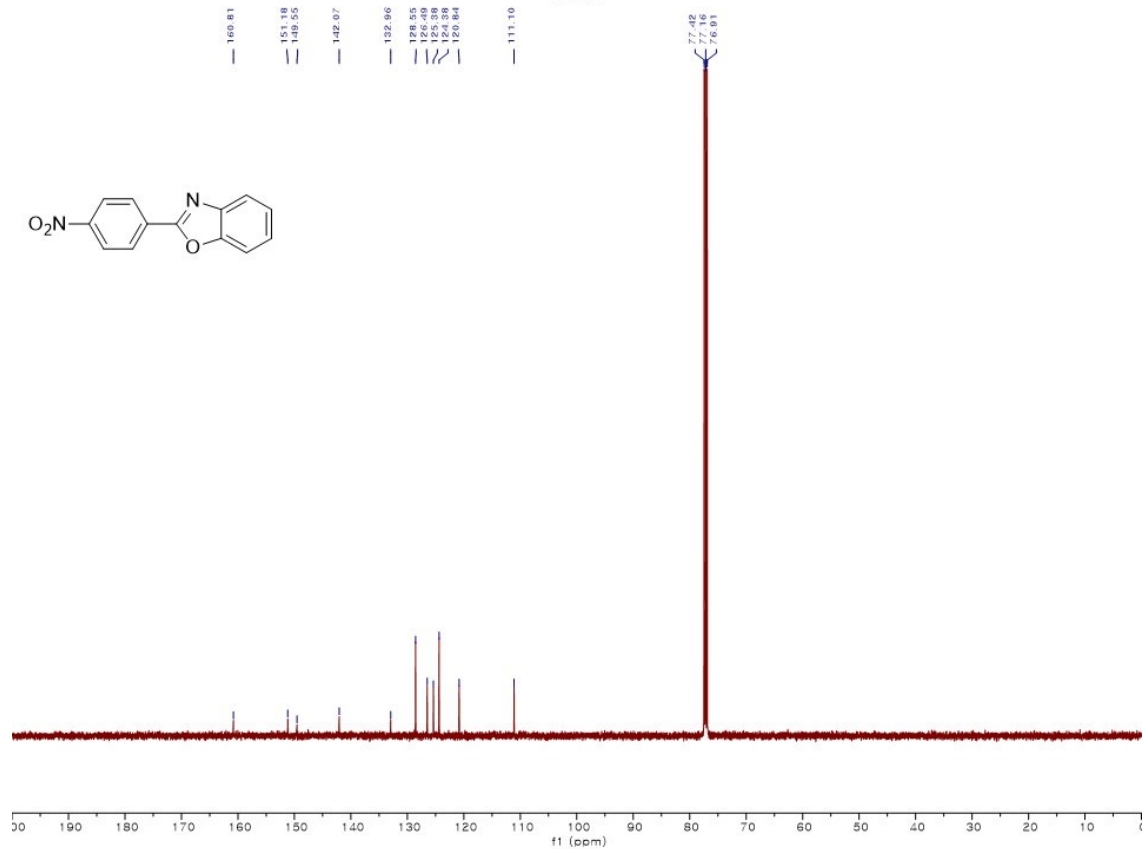



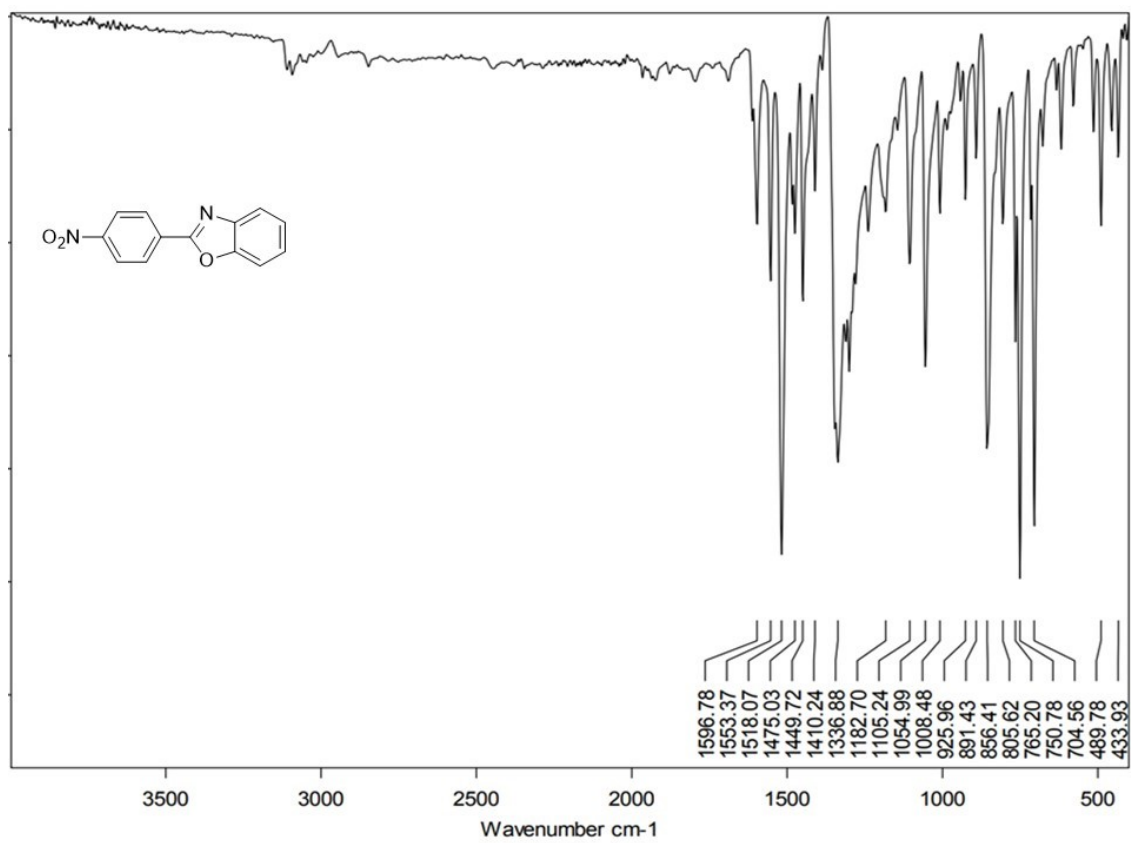

2-(*tert*-Butyl)benzoxazole(**3ia**)

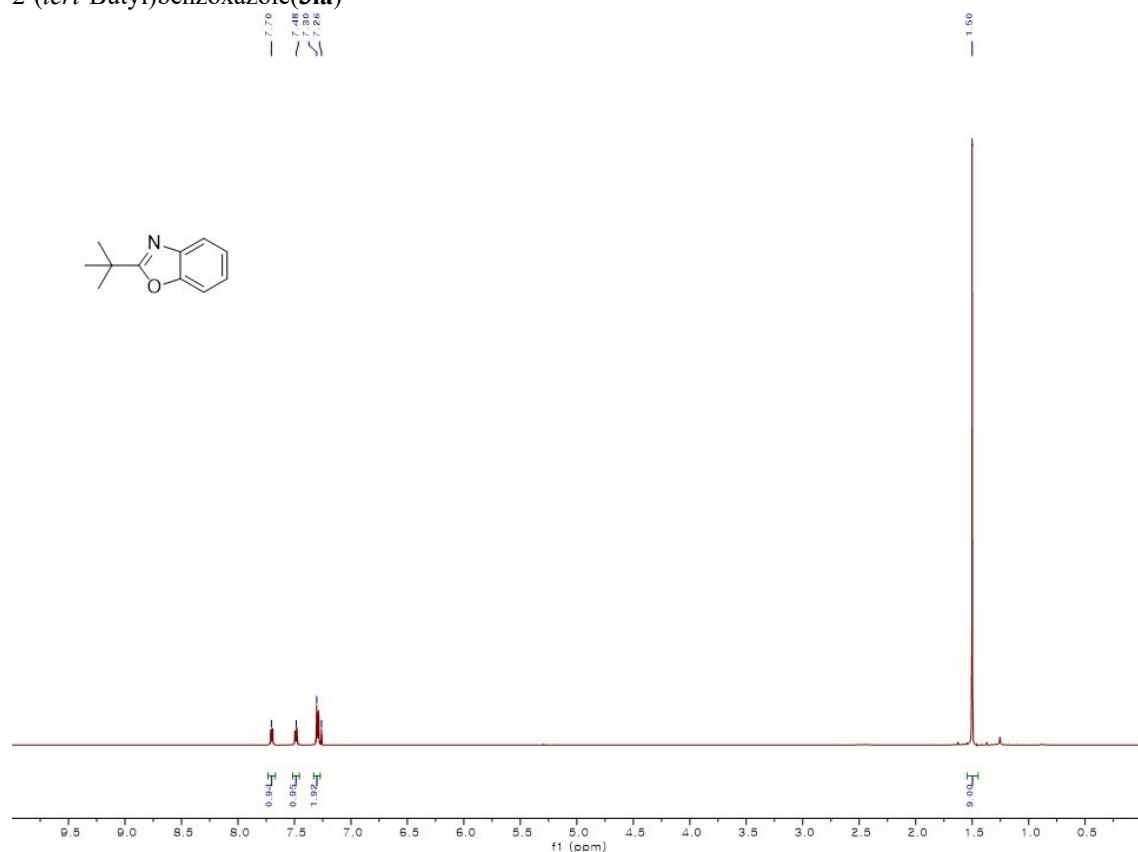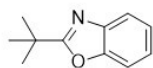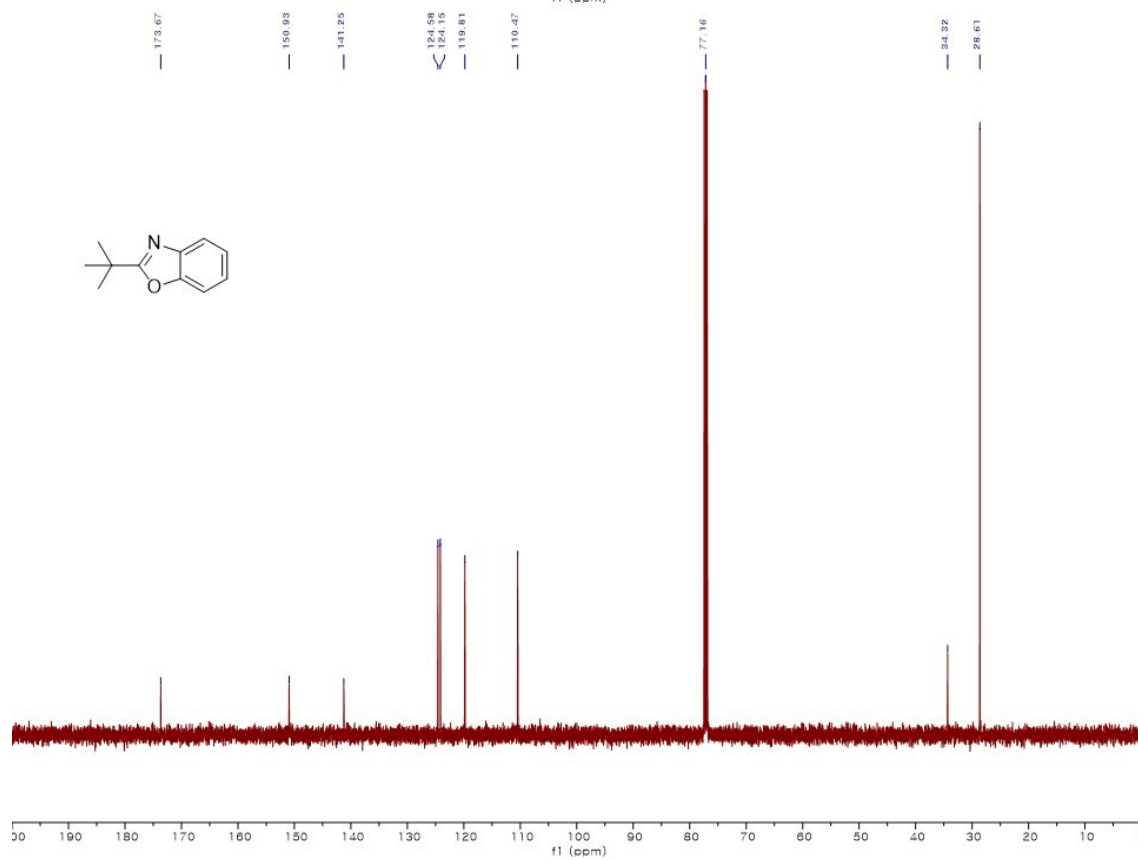

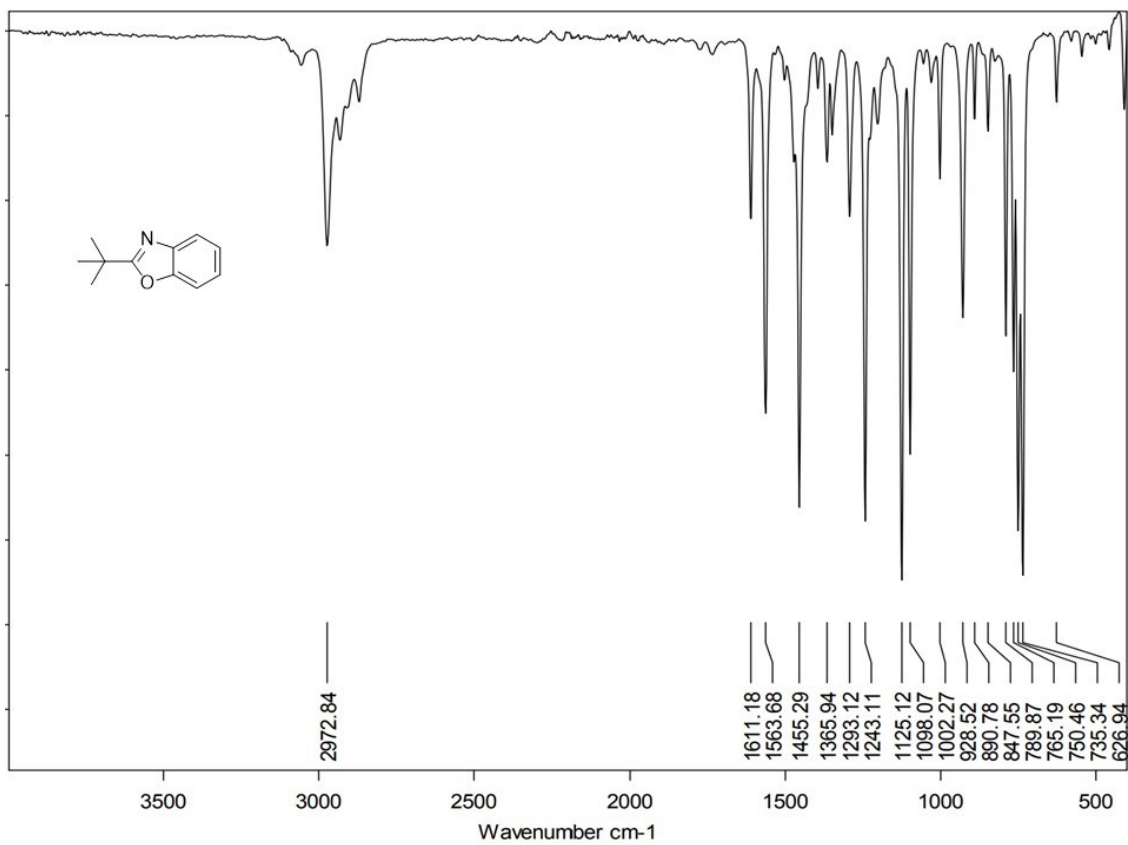

### 4-Methyl-2-phenylbenzoxazole (3ab)

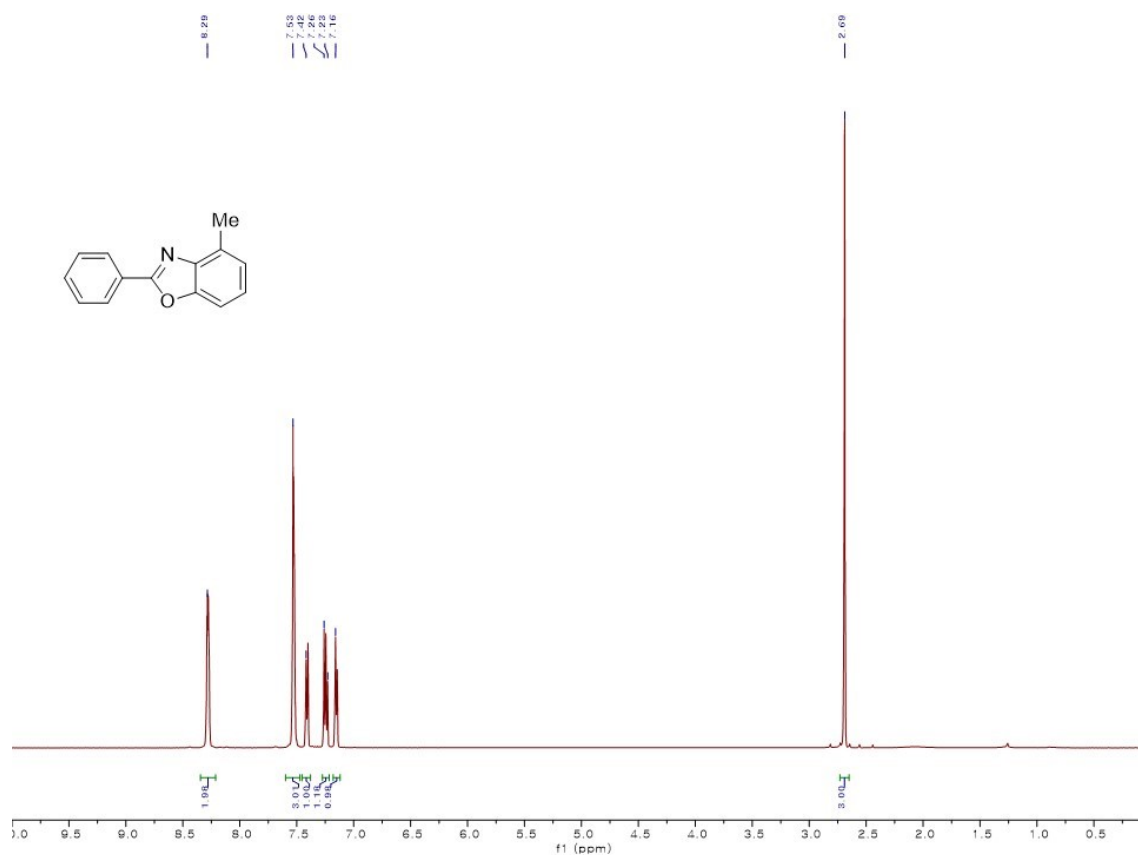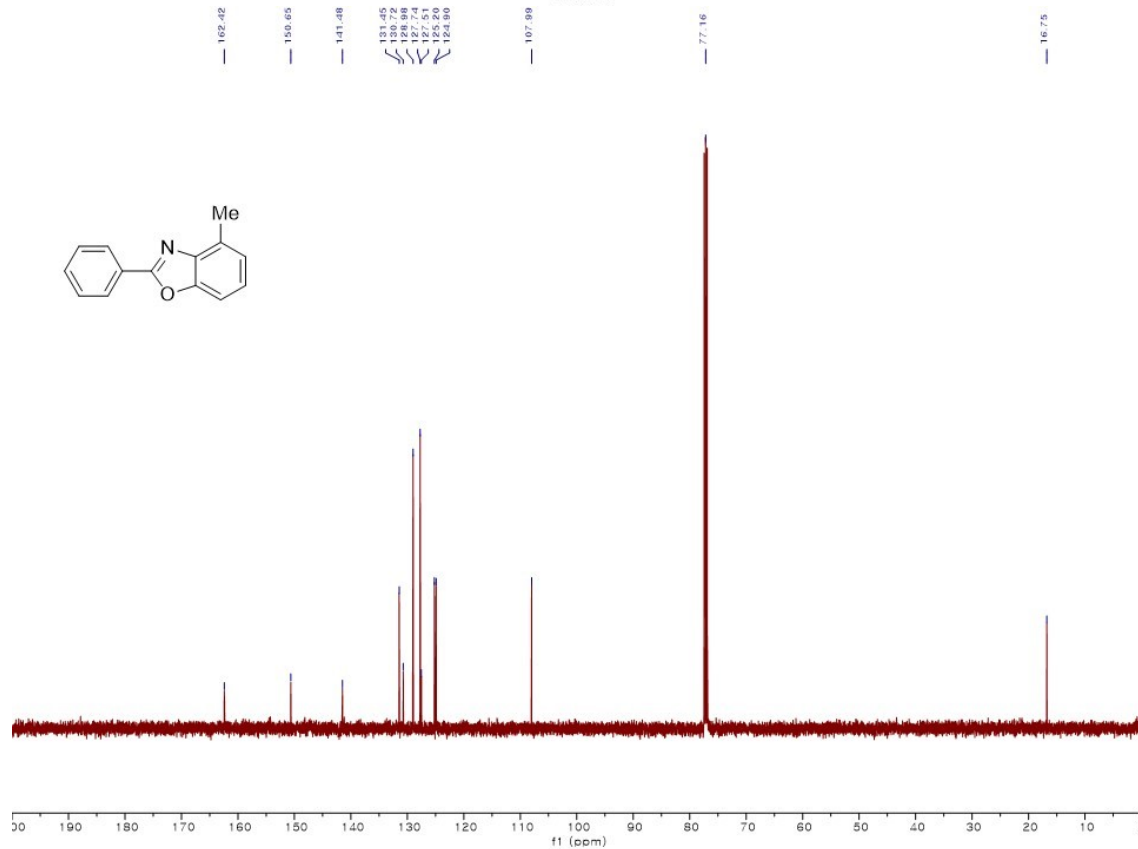

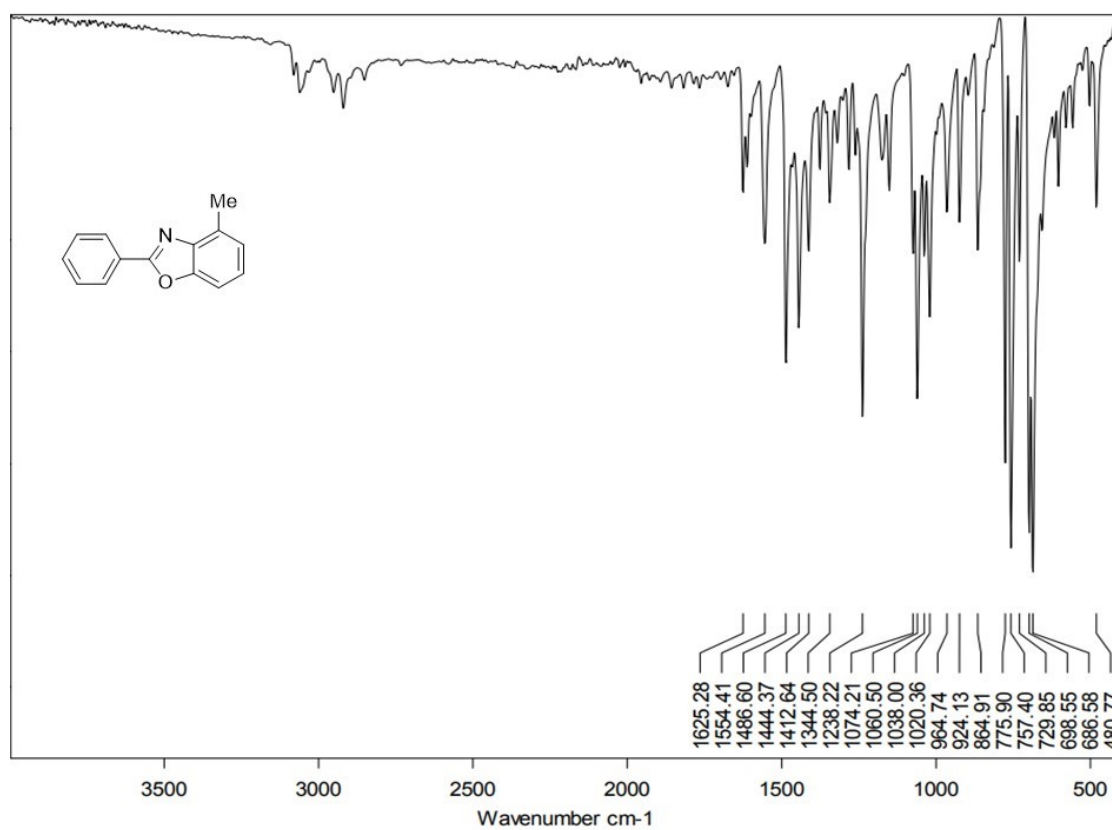

5-Methyl-2-phenylbenzoxazole (3ac)

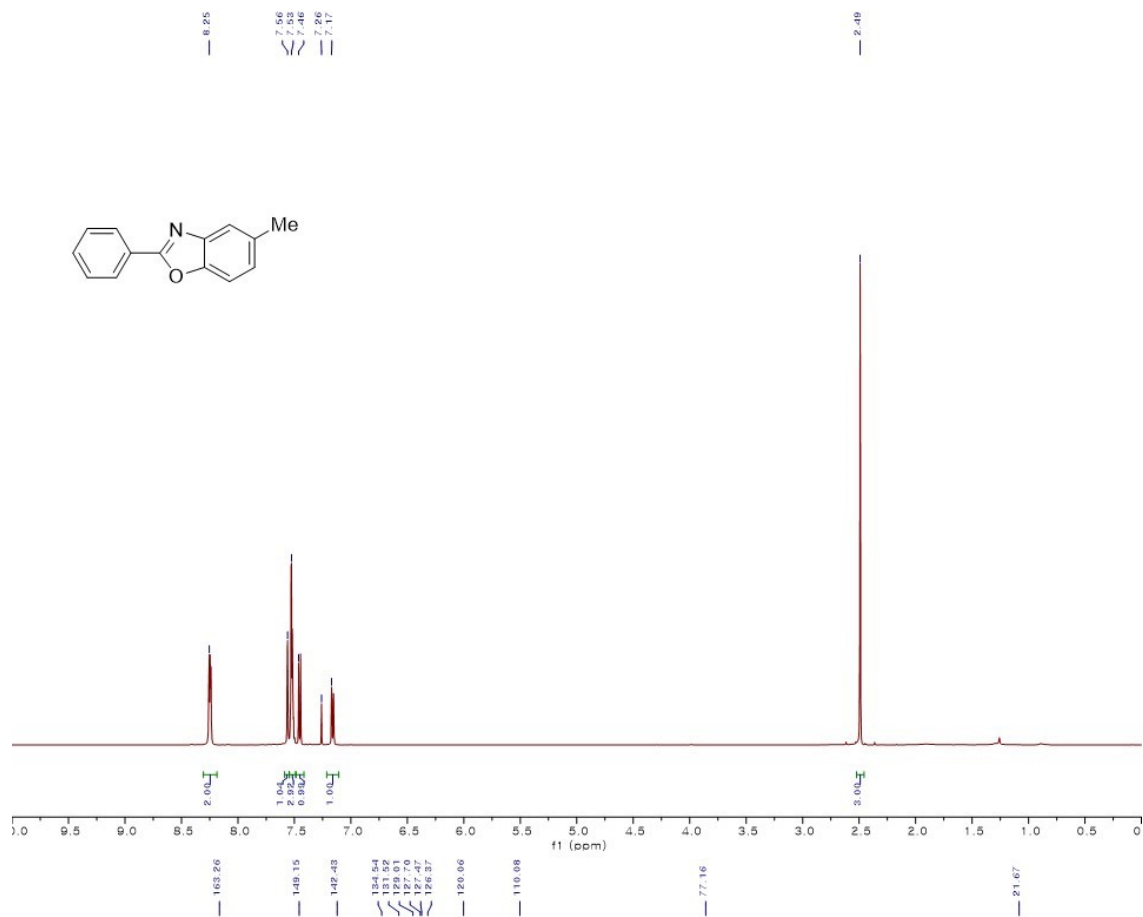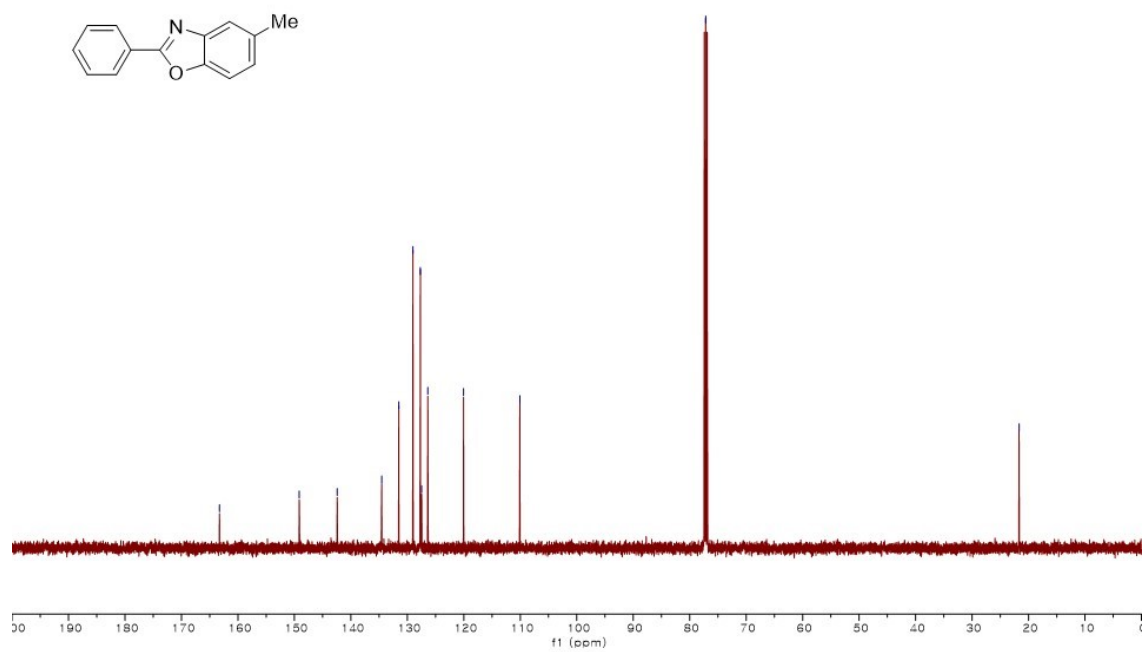

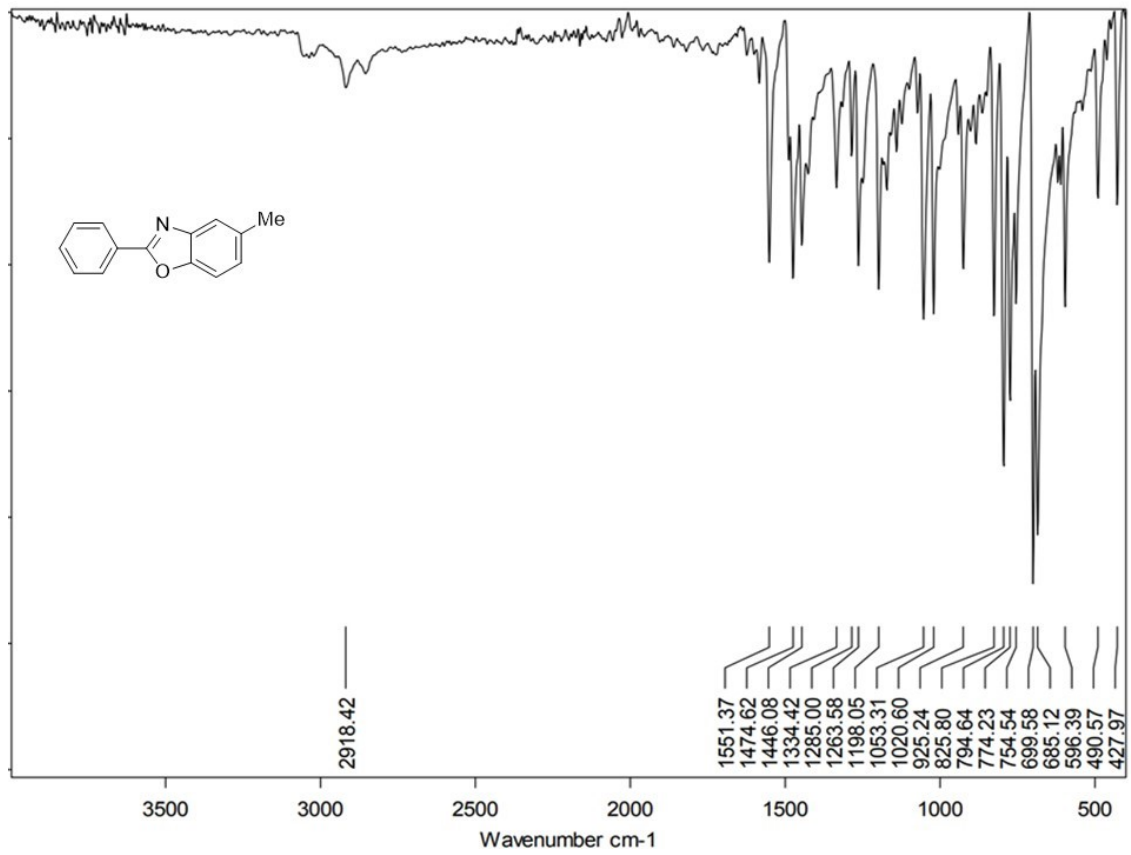

6-Methyl-2-phenylbenzoxazole (3ad)

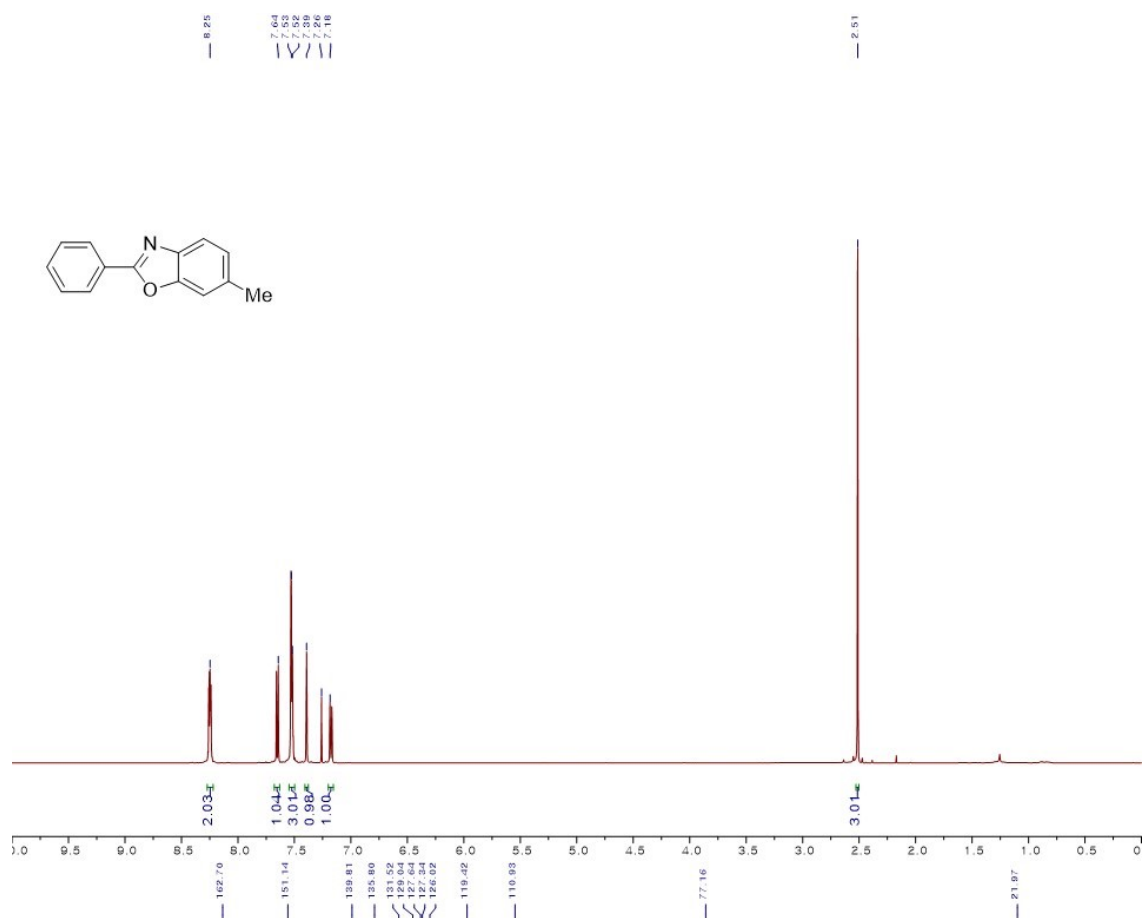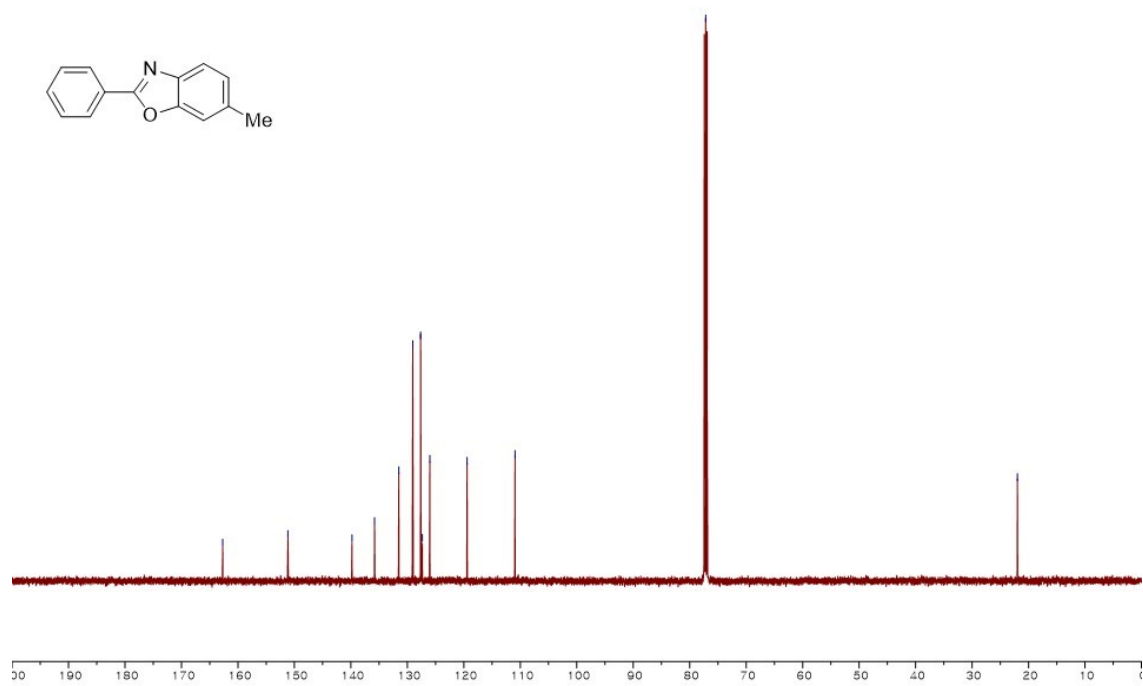



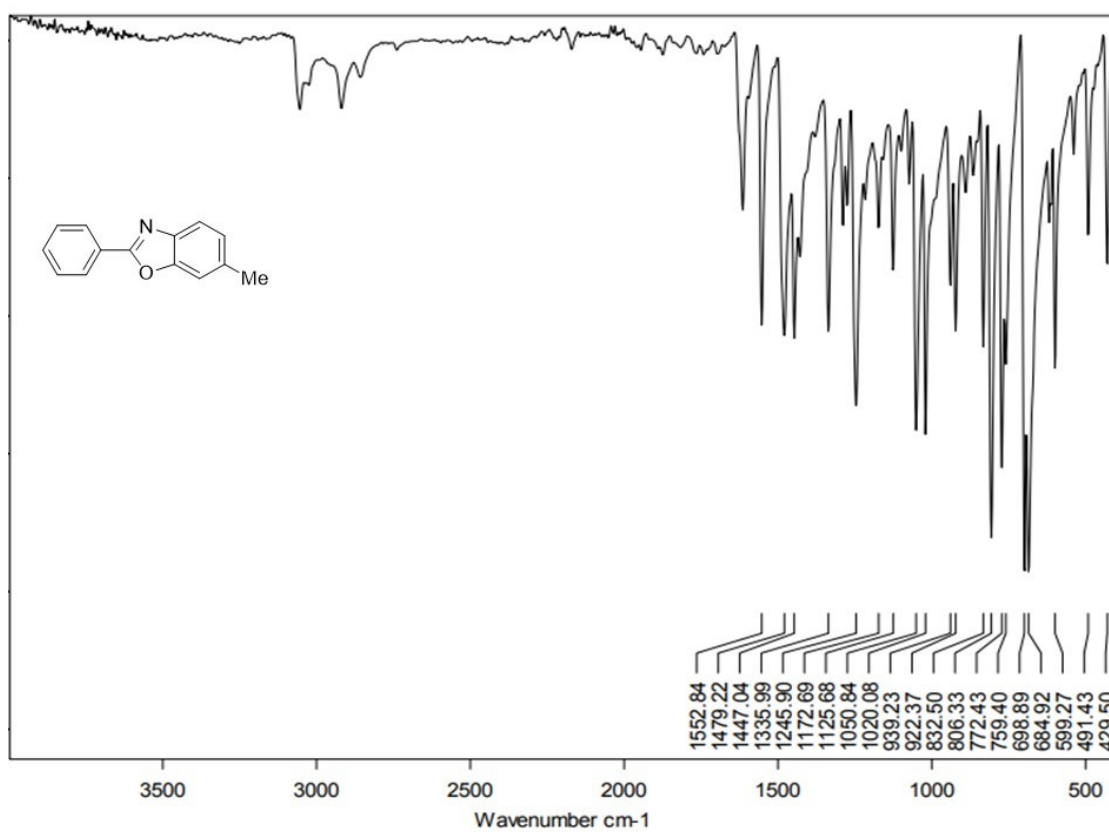

# 2,5-Diphenylbenzoxazole (3ae)

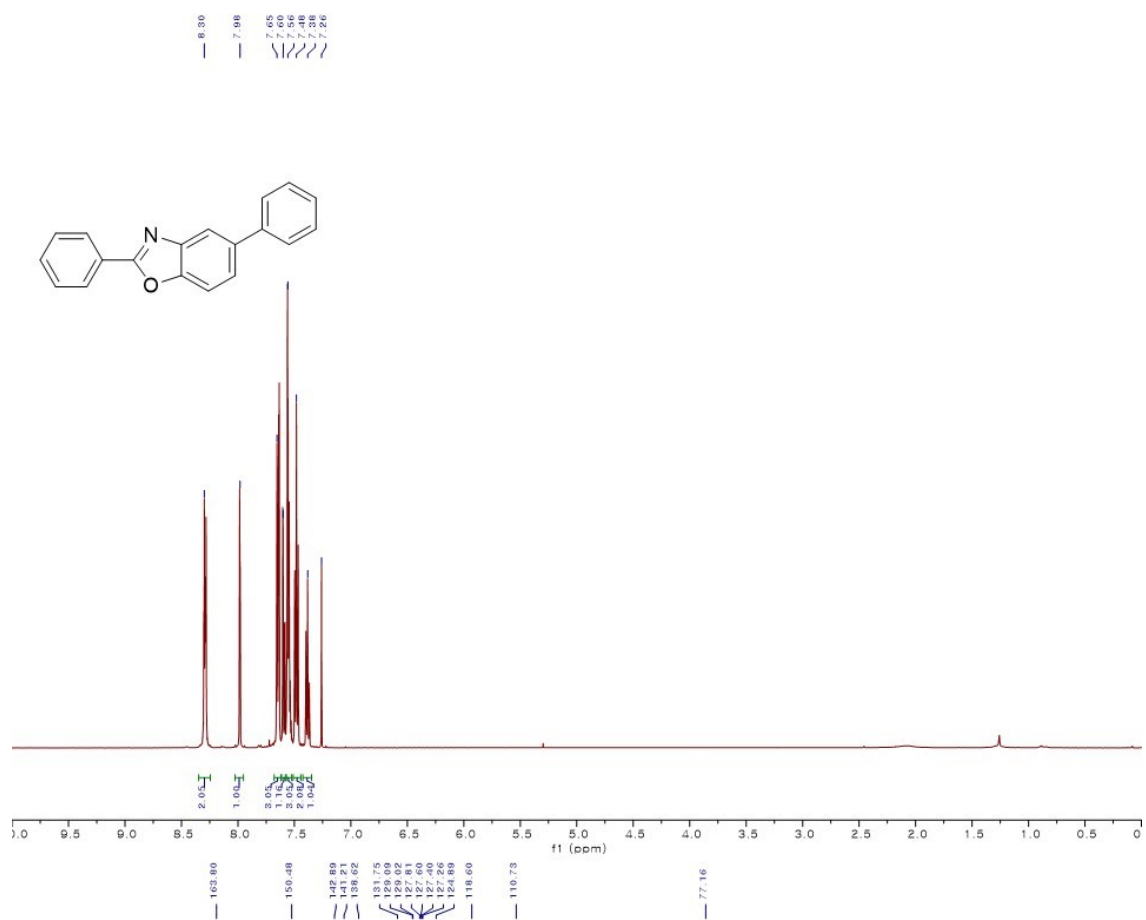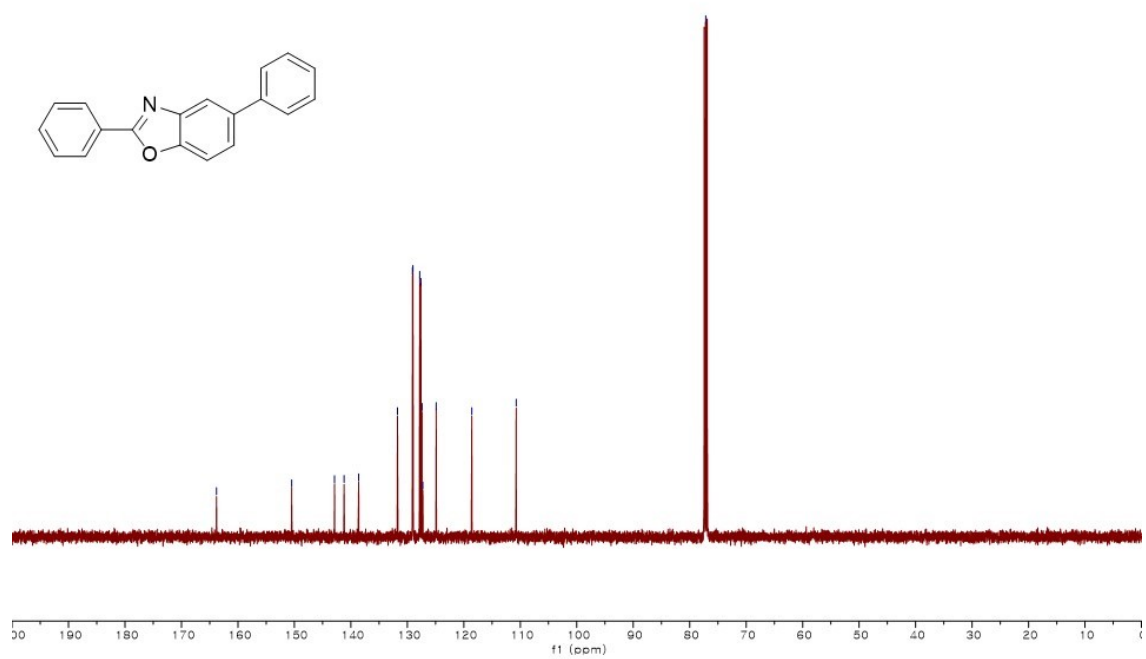

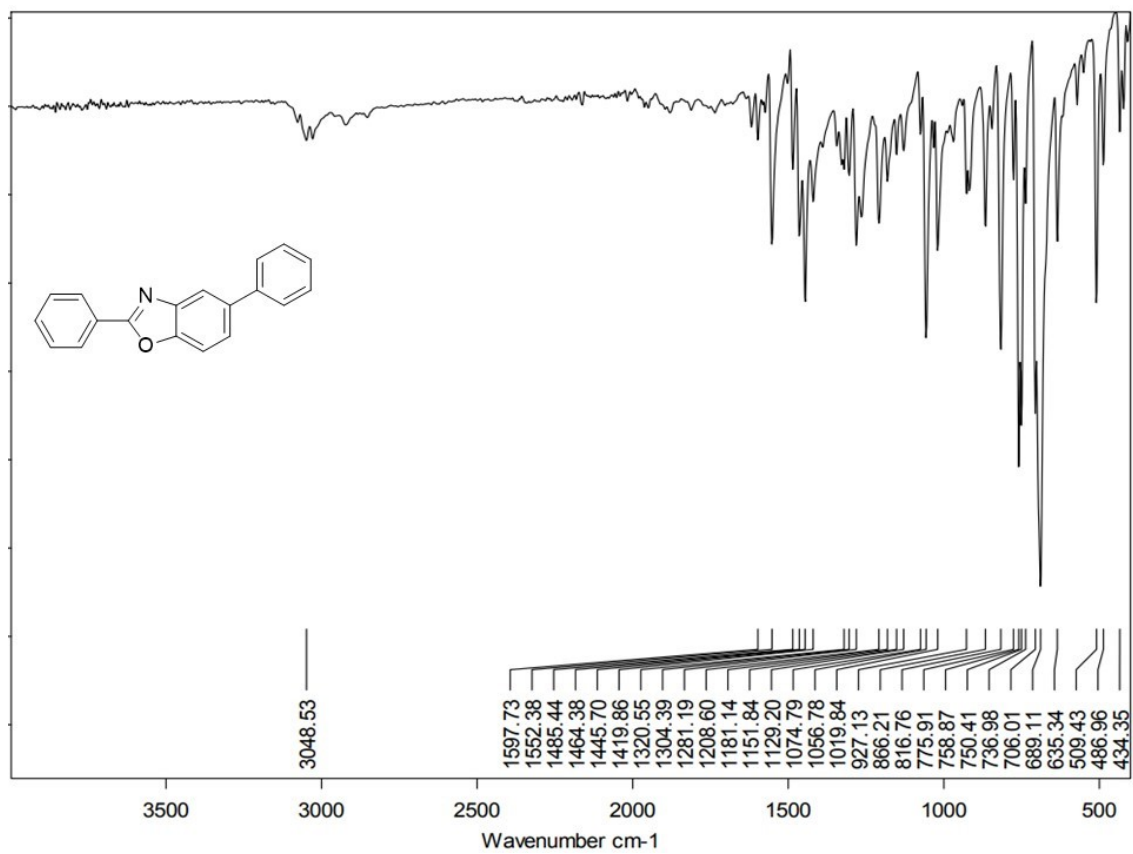

5-Nitro-2-phenylbenzoxazole (3af)

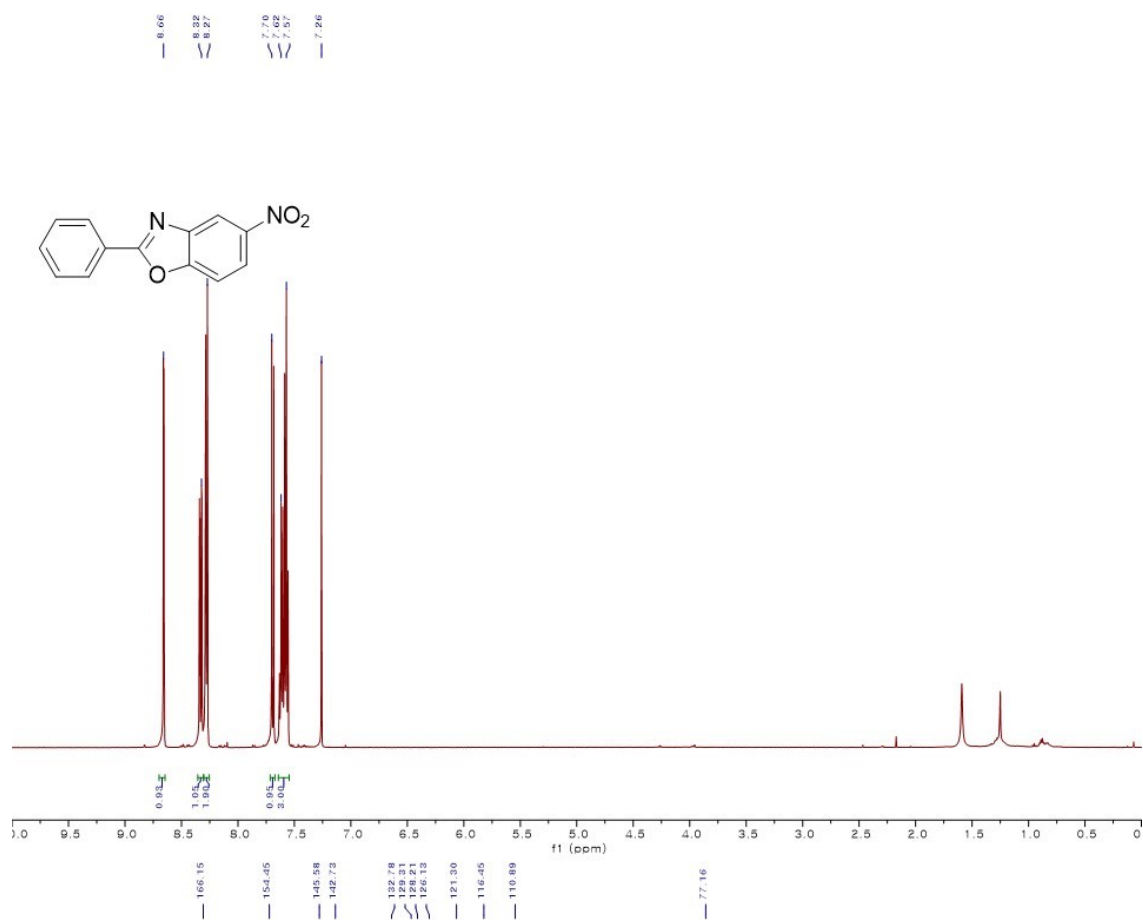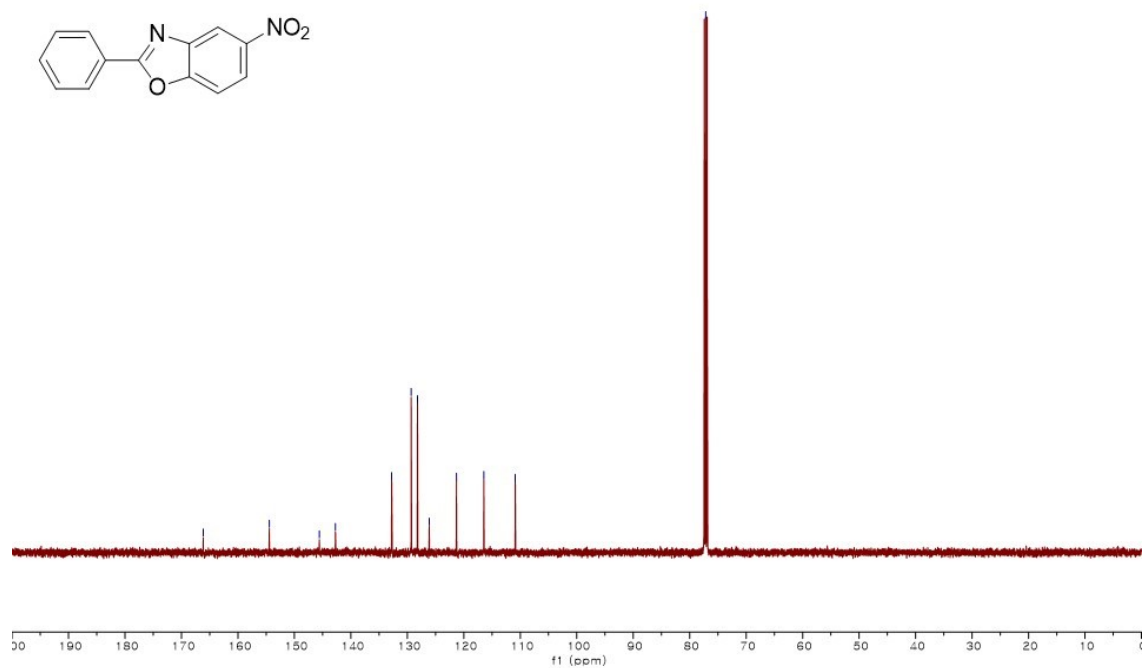

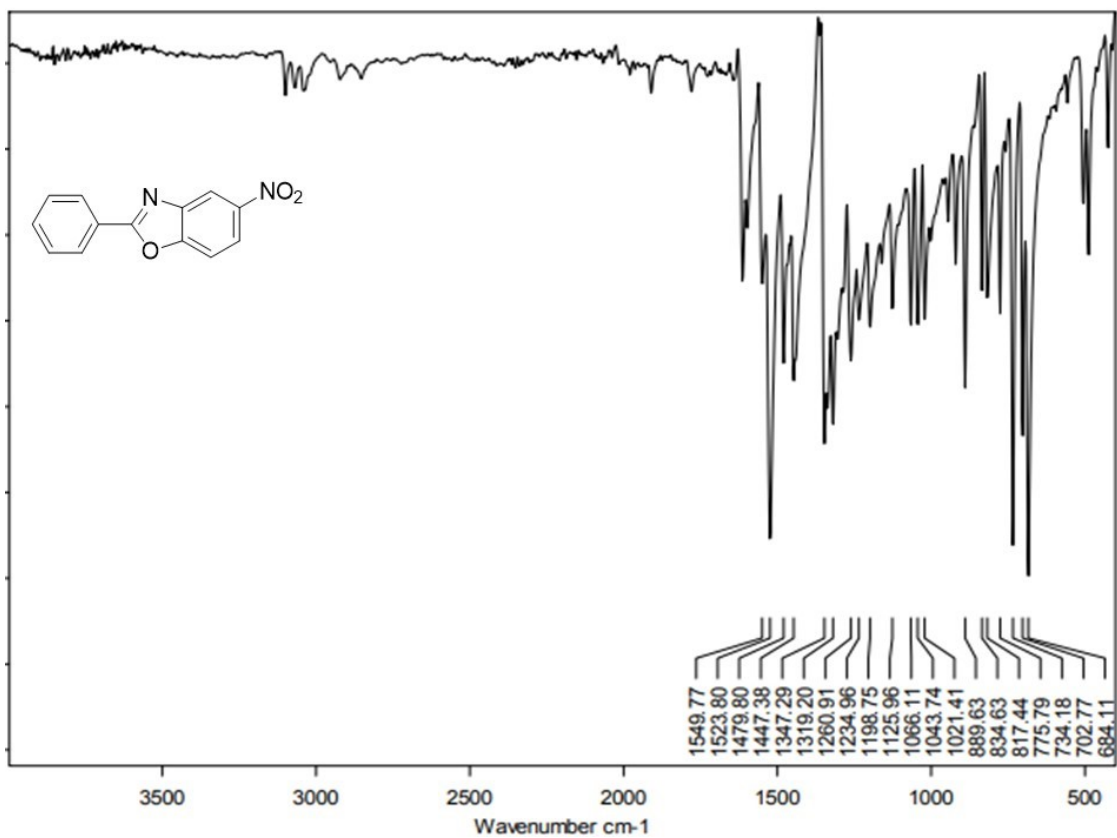

### 2-Phenylbenzothiazole (3ag)

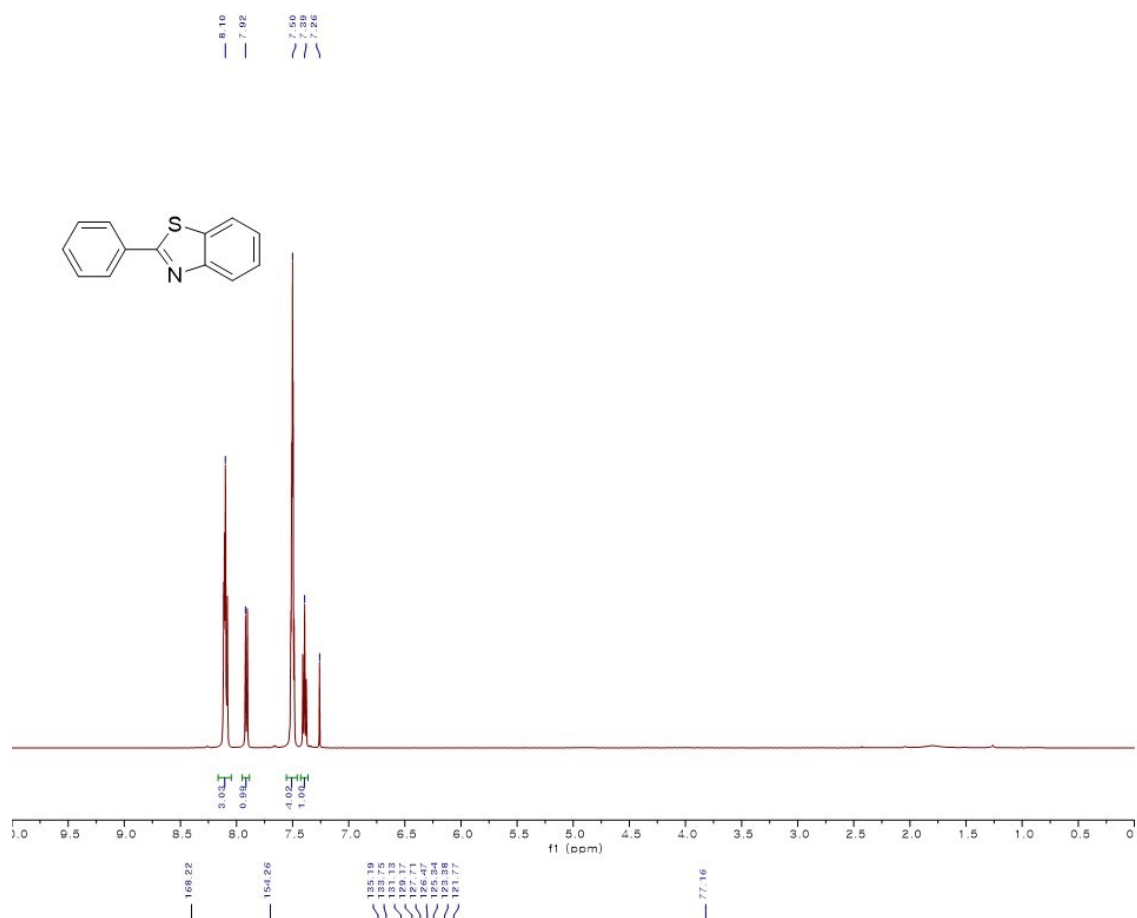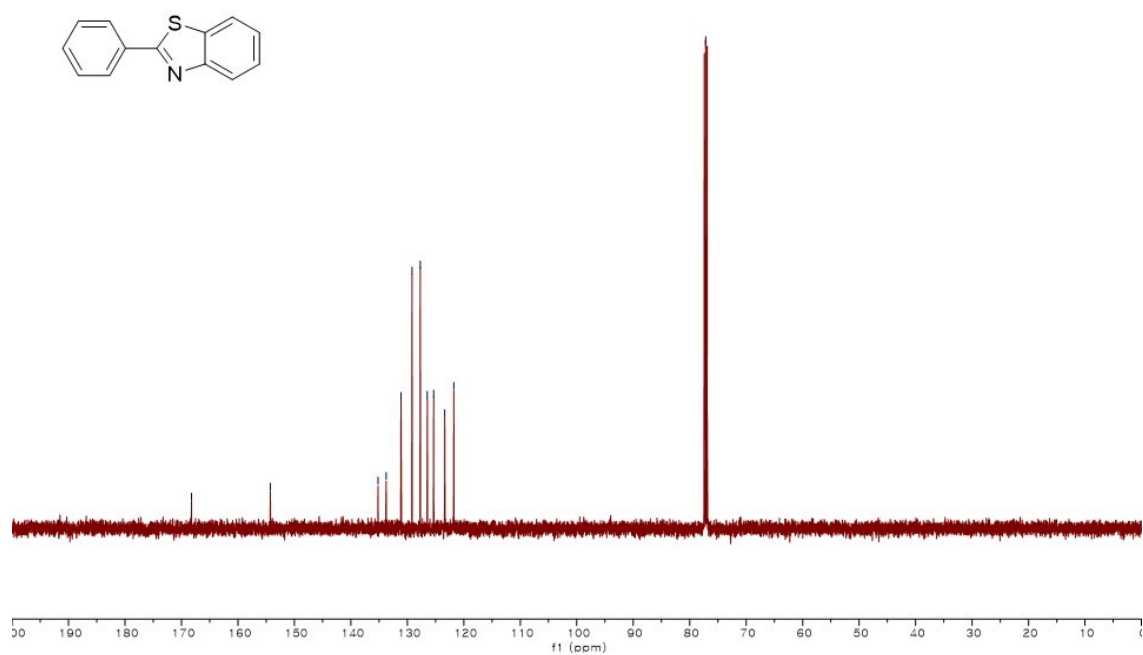

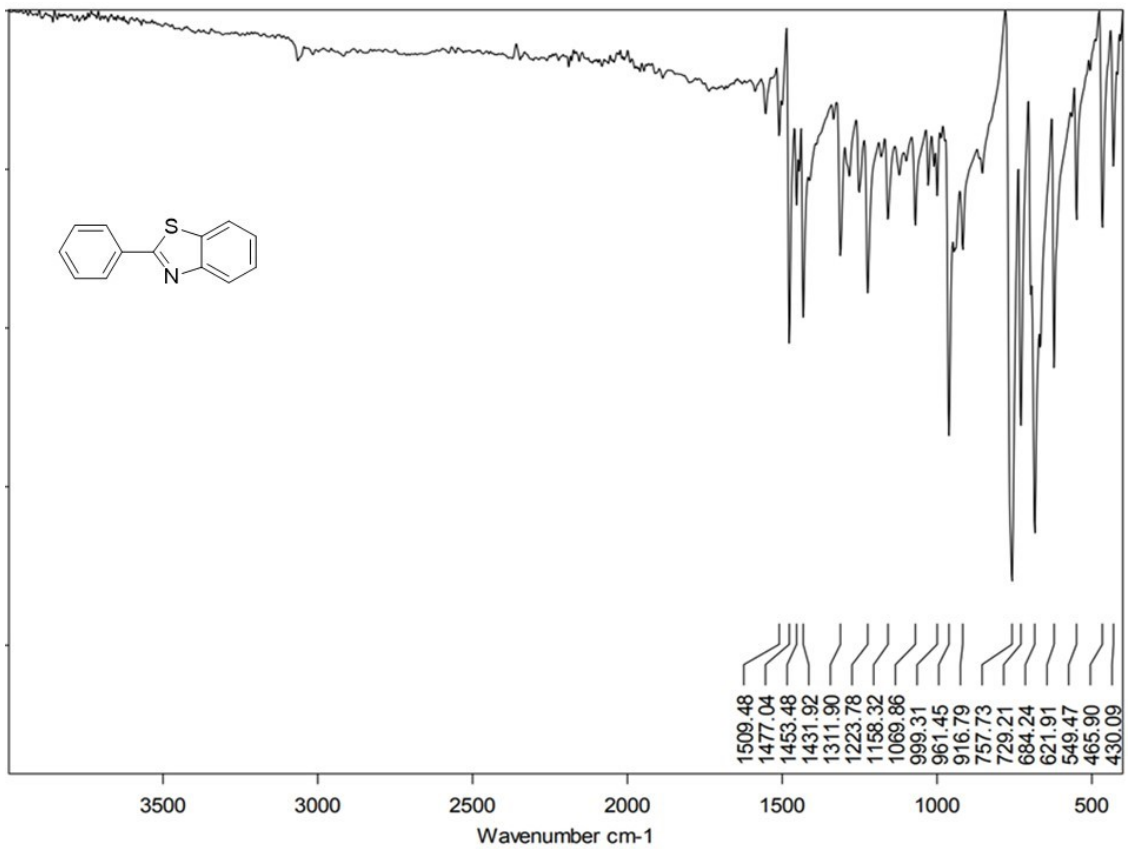

2-Pheny-1H-benzoimidazole (**3ah**)

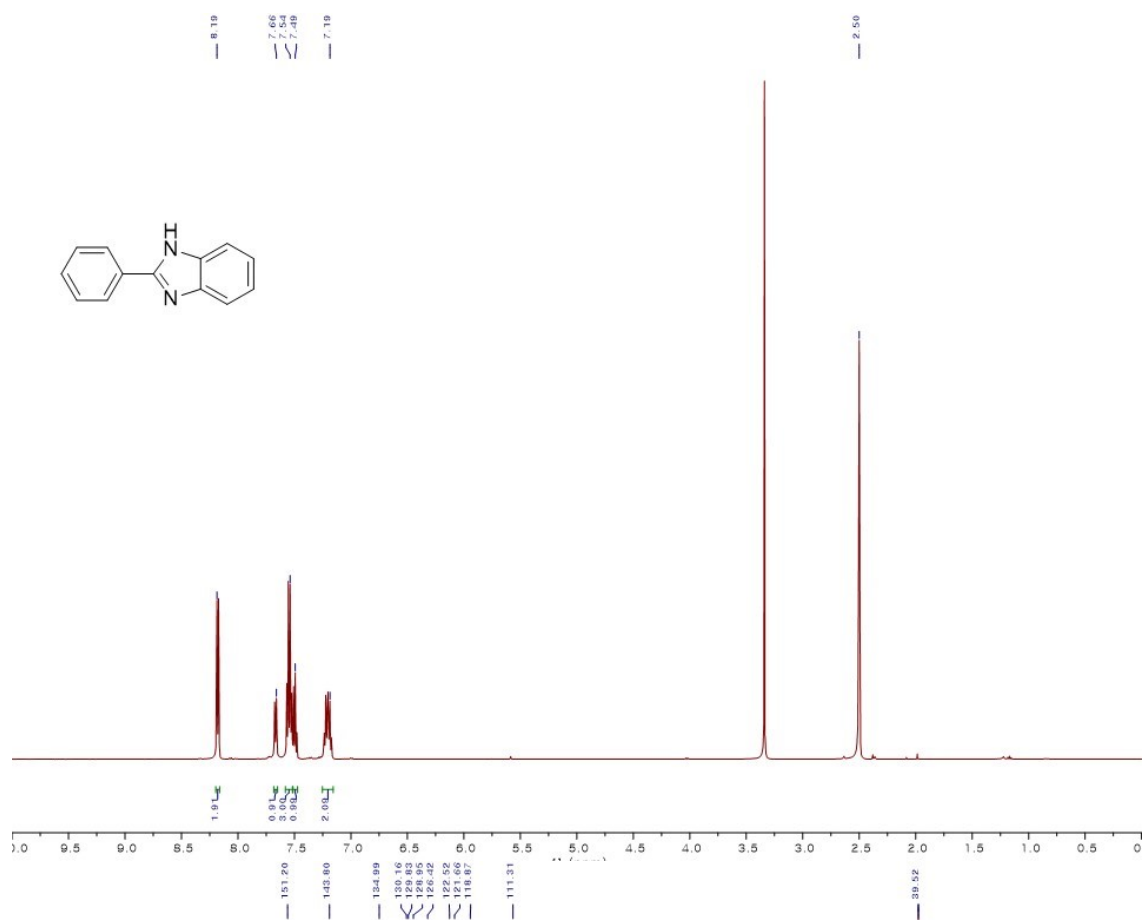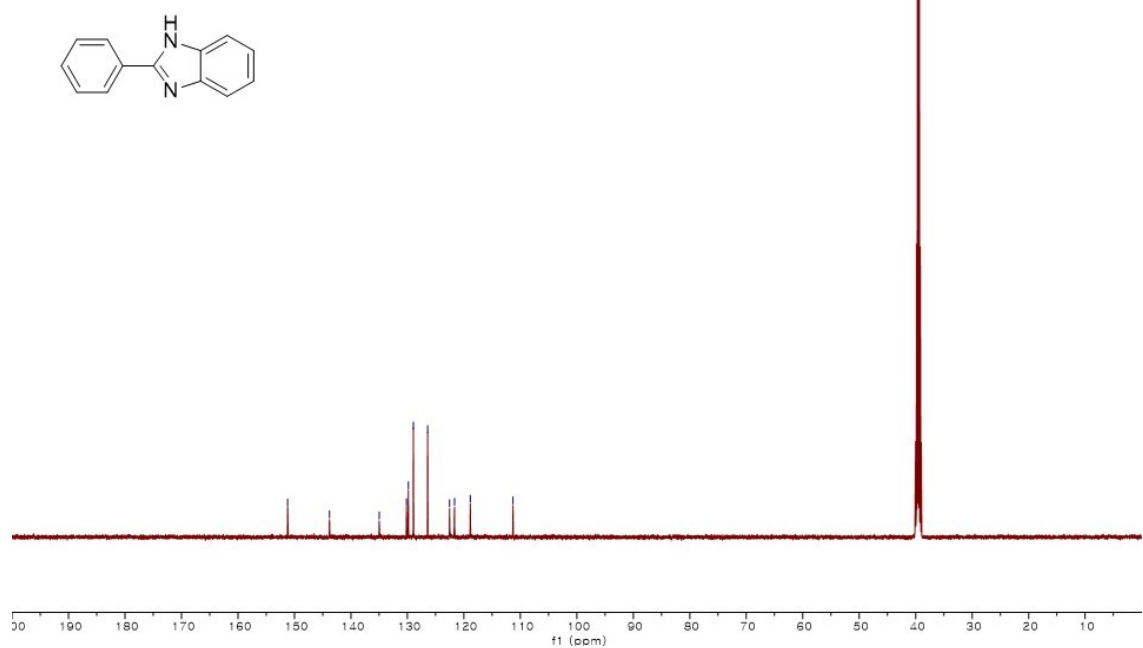



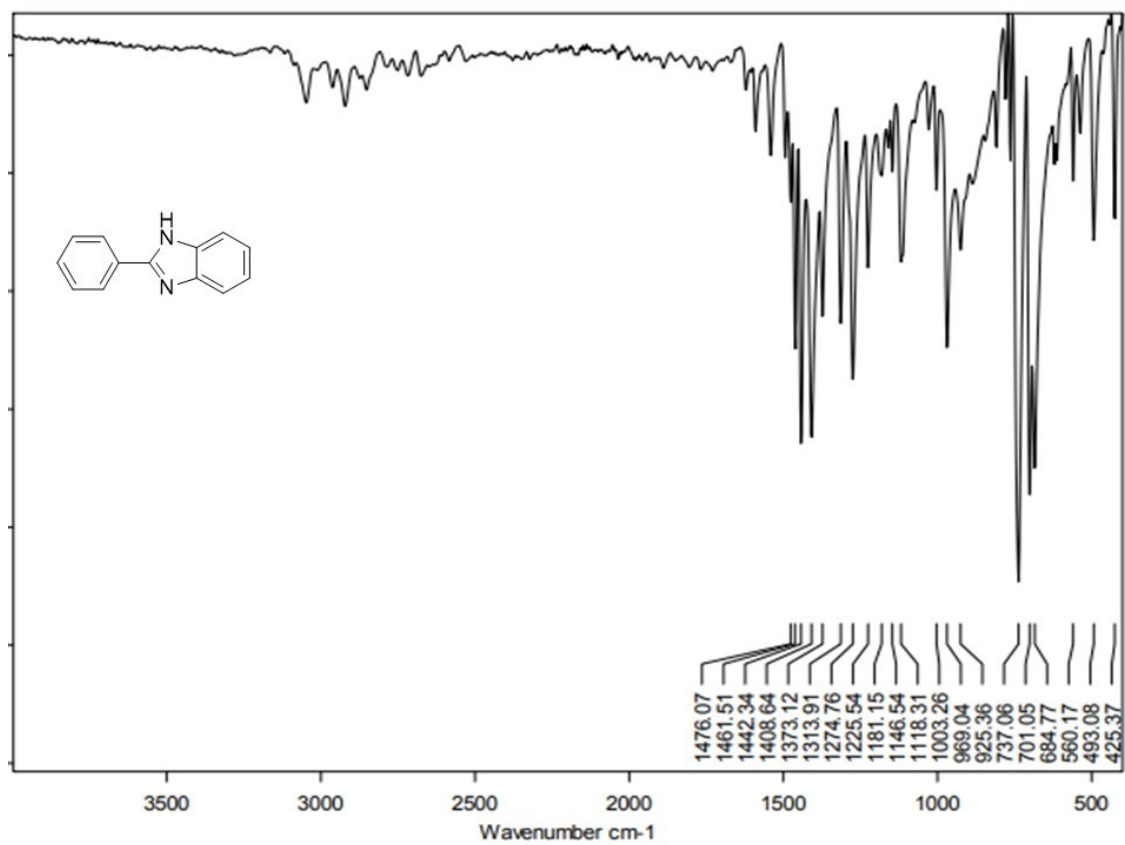

PDI-Ph-Benzox (Perylene-3,9,10,12-tetracarboxylic diimide-phenylbenzoxazole, **3ja**)

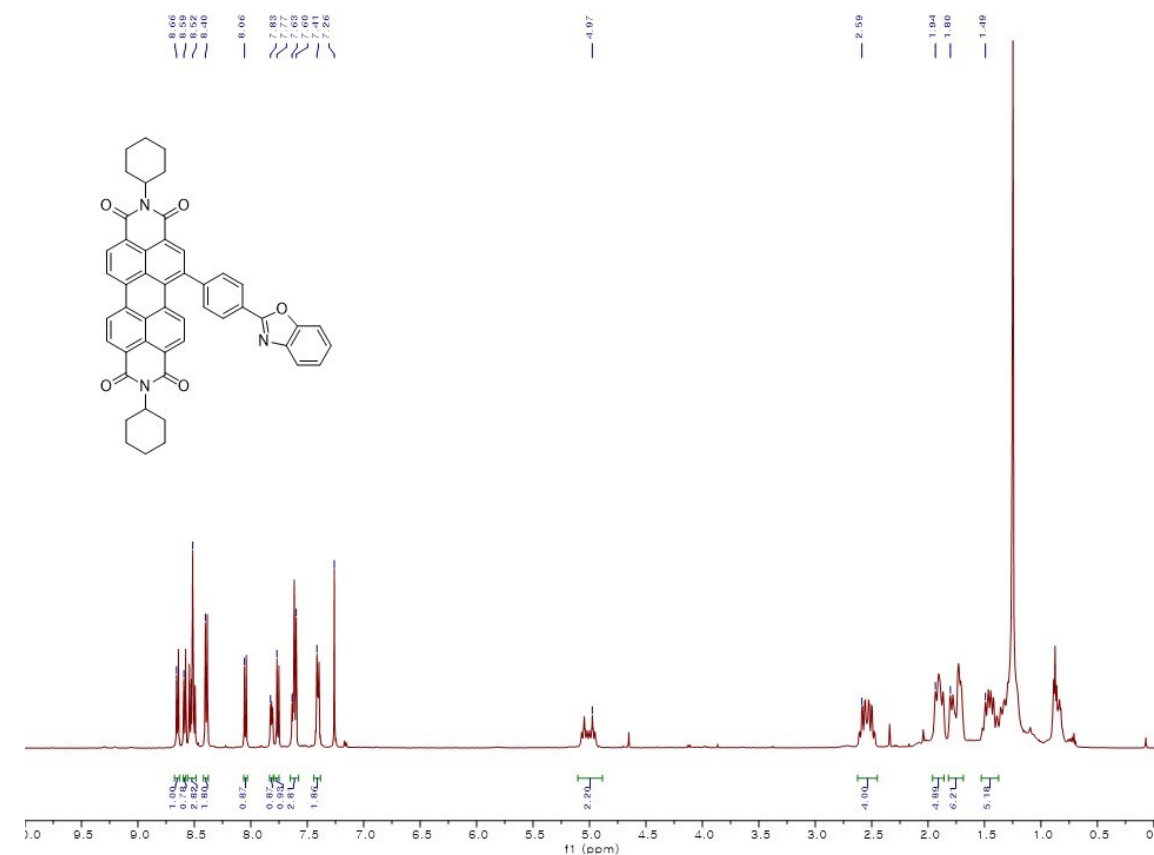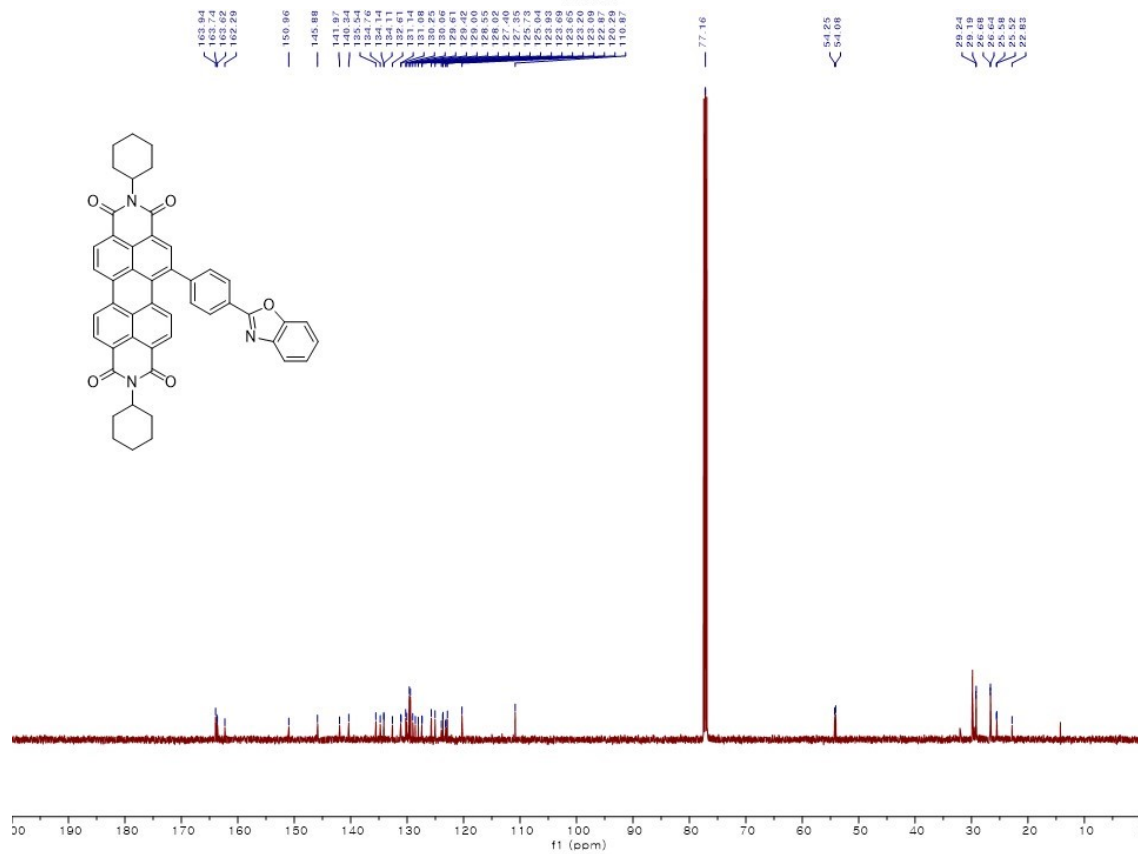

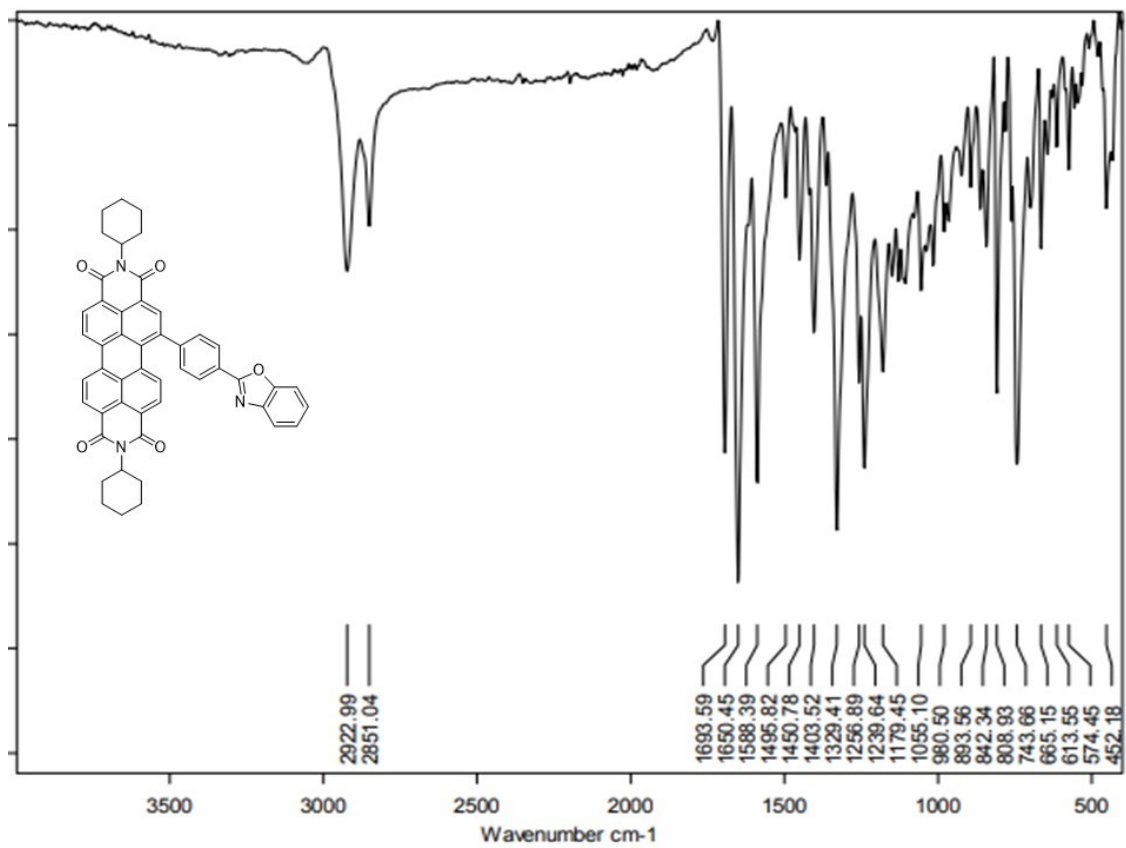

# PDI (Perylenediimide)

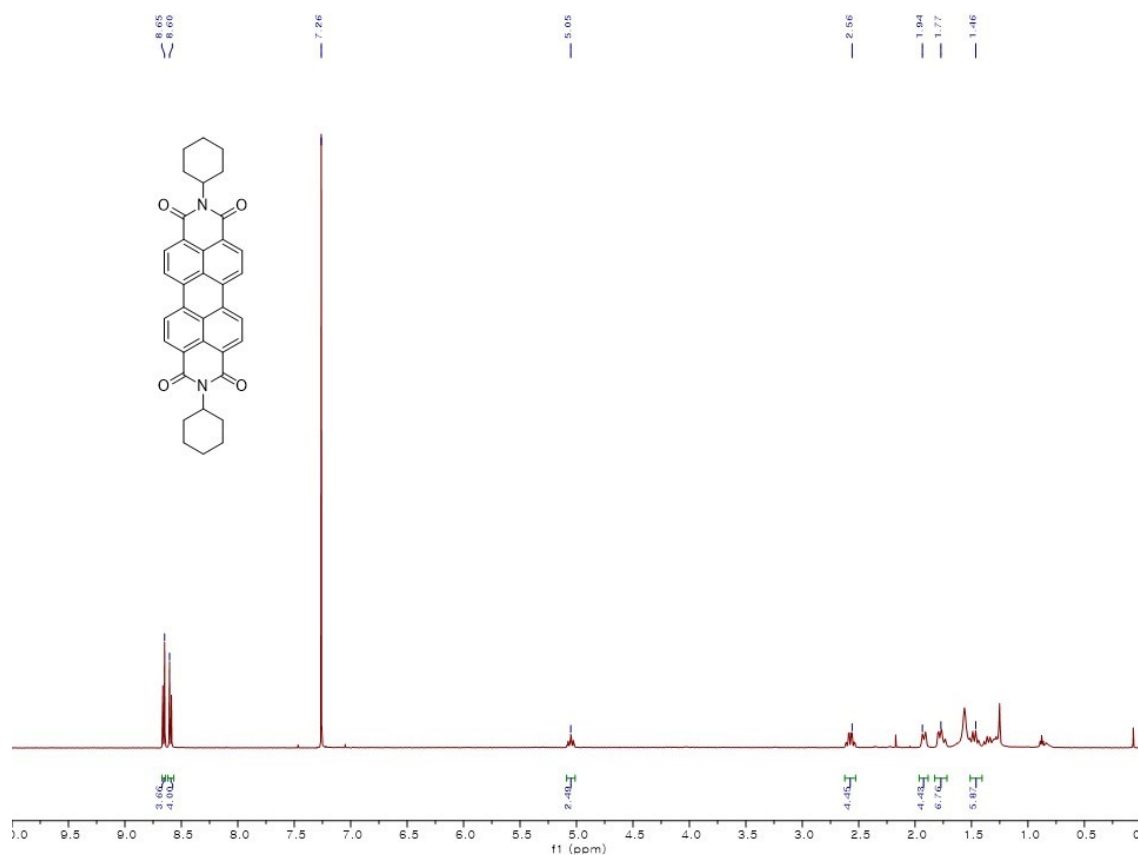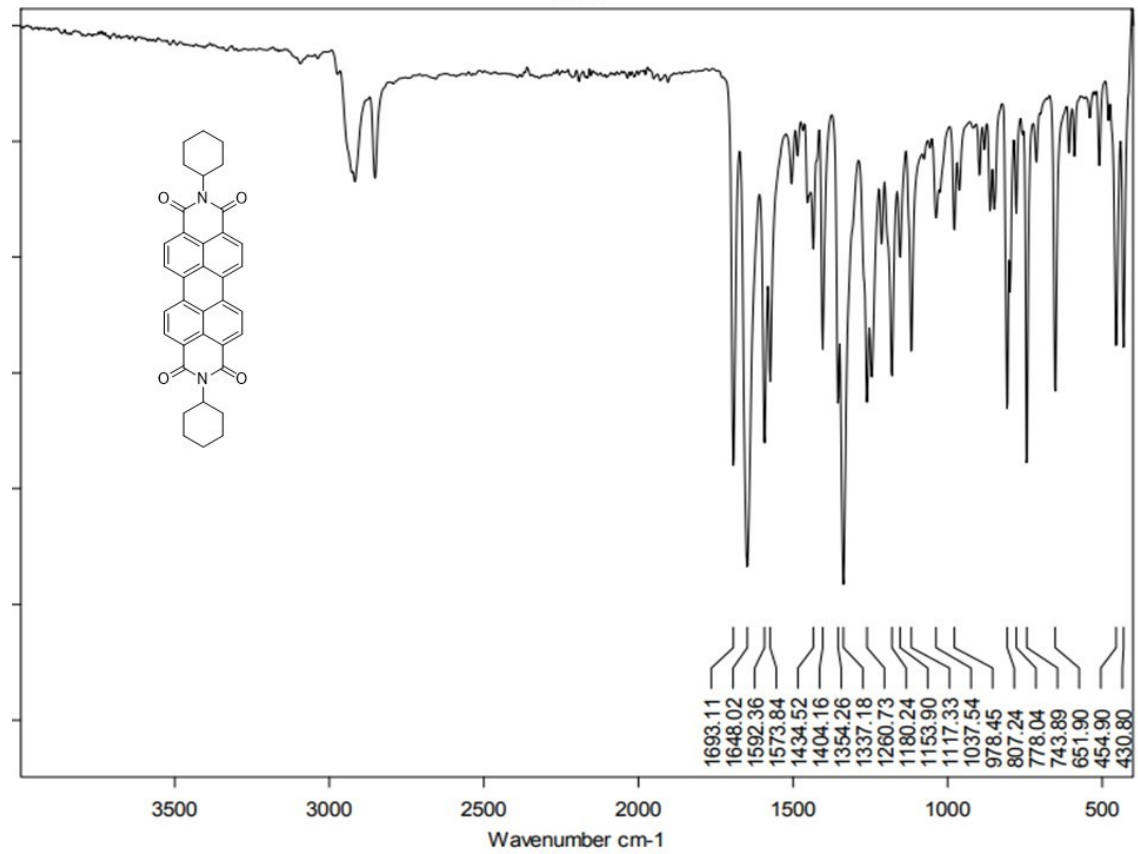

PDI-NO<sub>2</sub> (Perylenediimide-NO<sub>2</sub>)

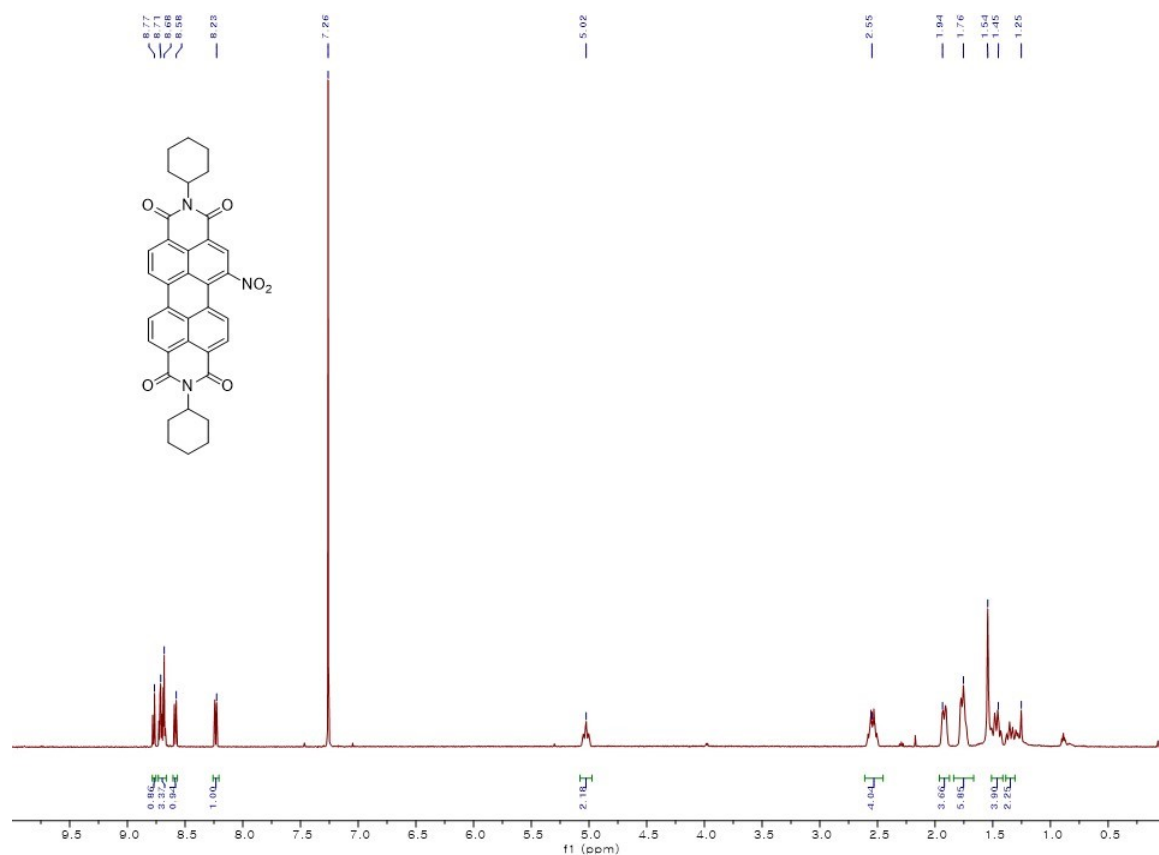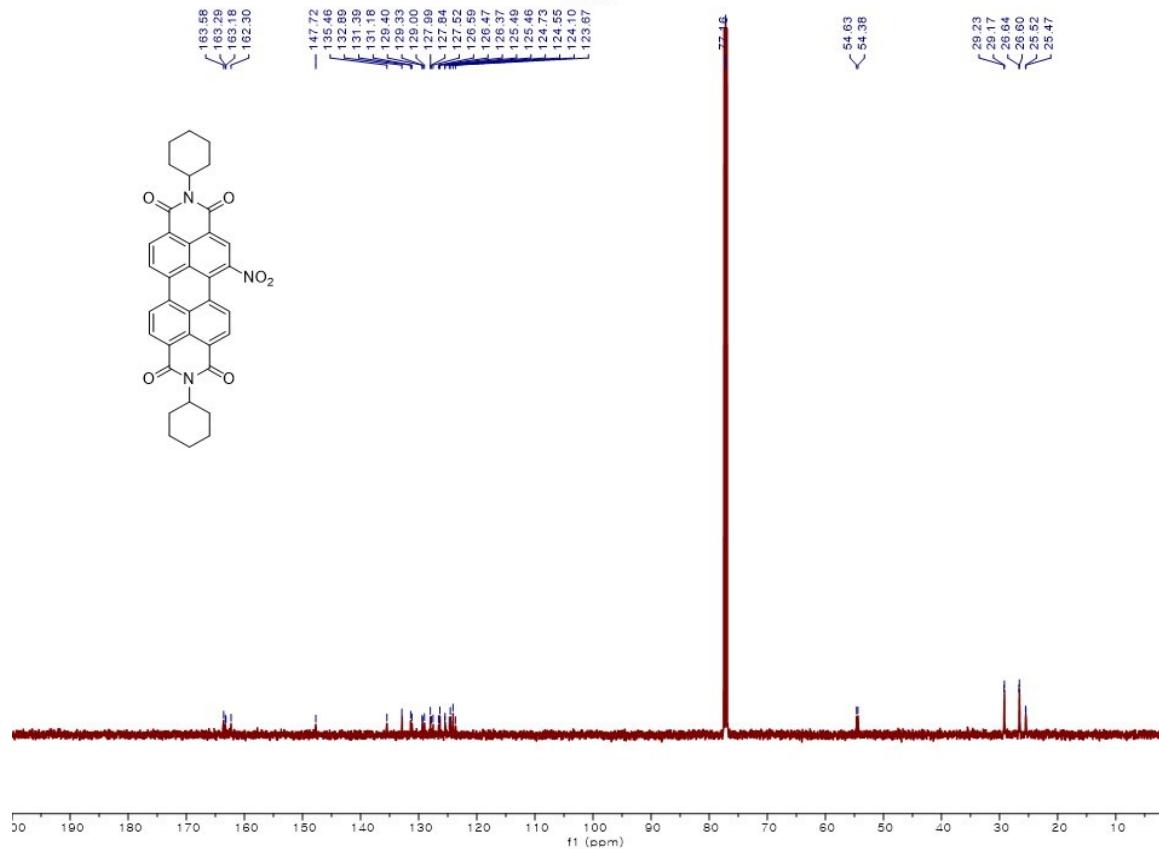

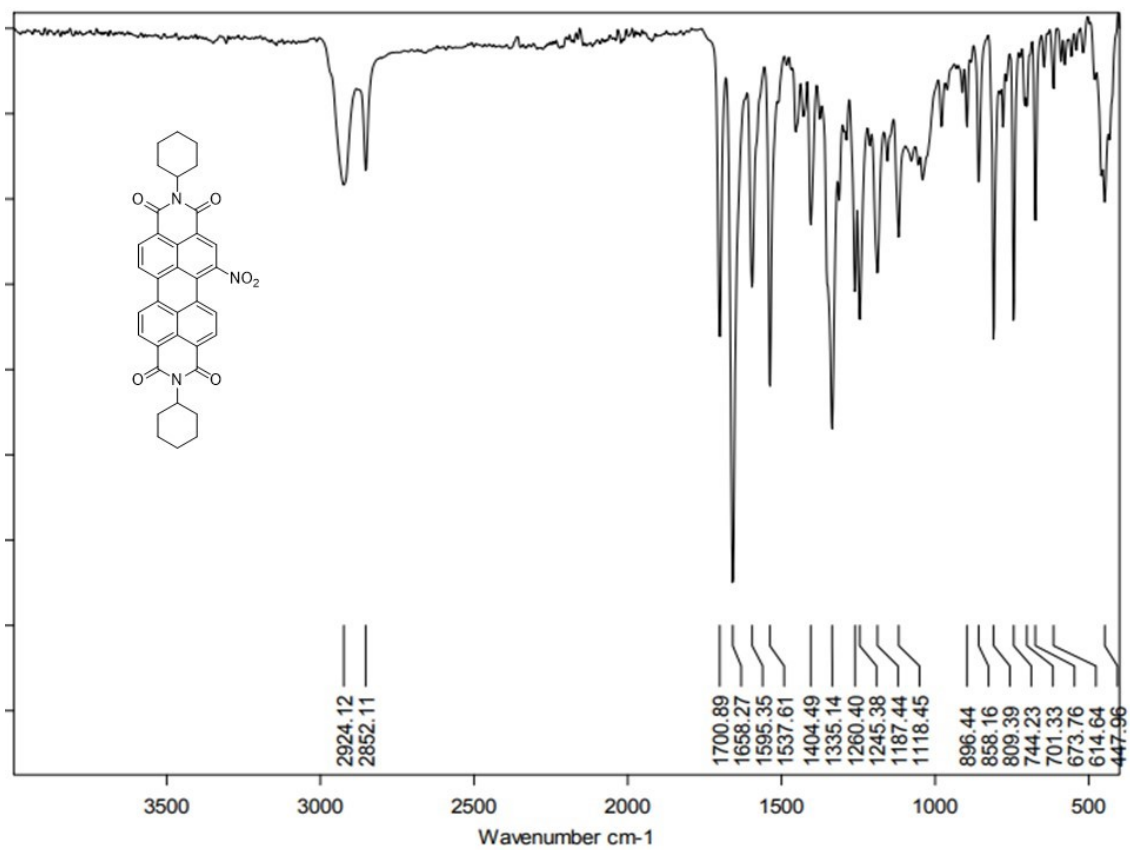

PDI-Ph-CHO (Perylene-3,4,9,10-tetracarboxylic diimide-phenylaldehyde)

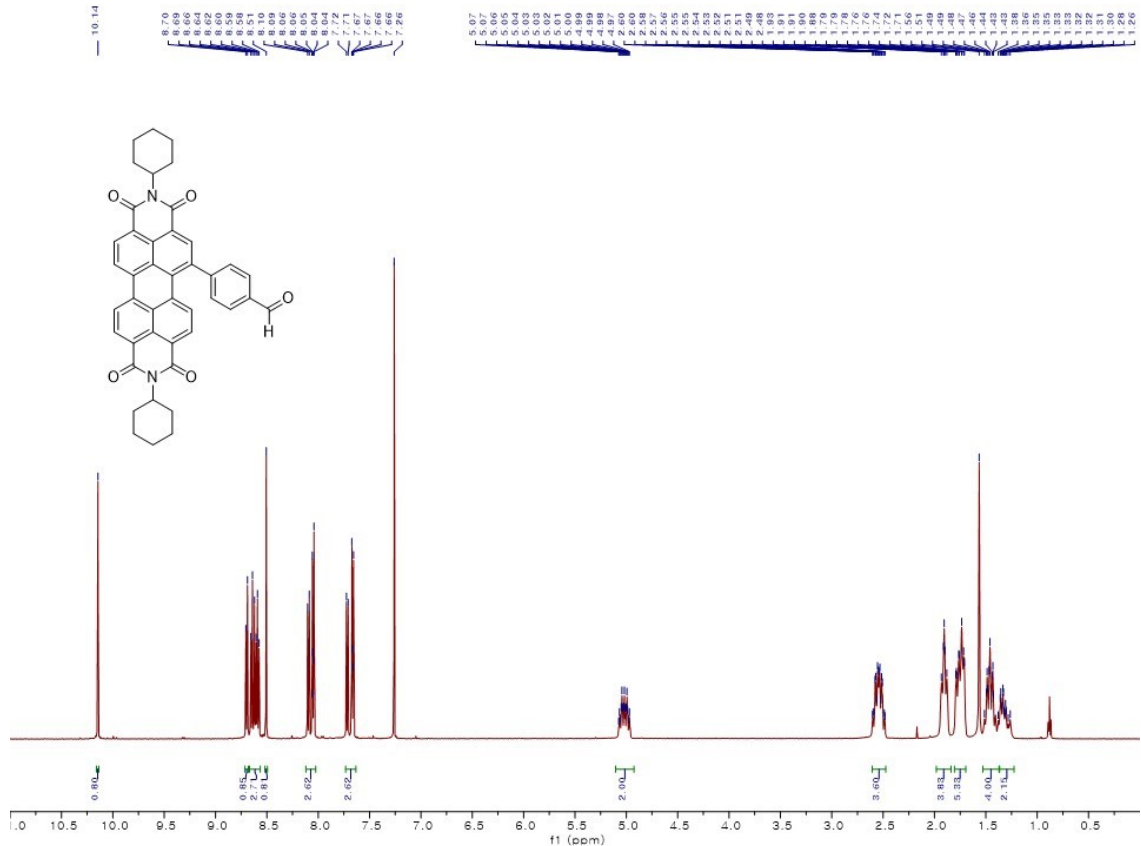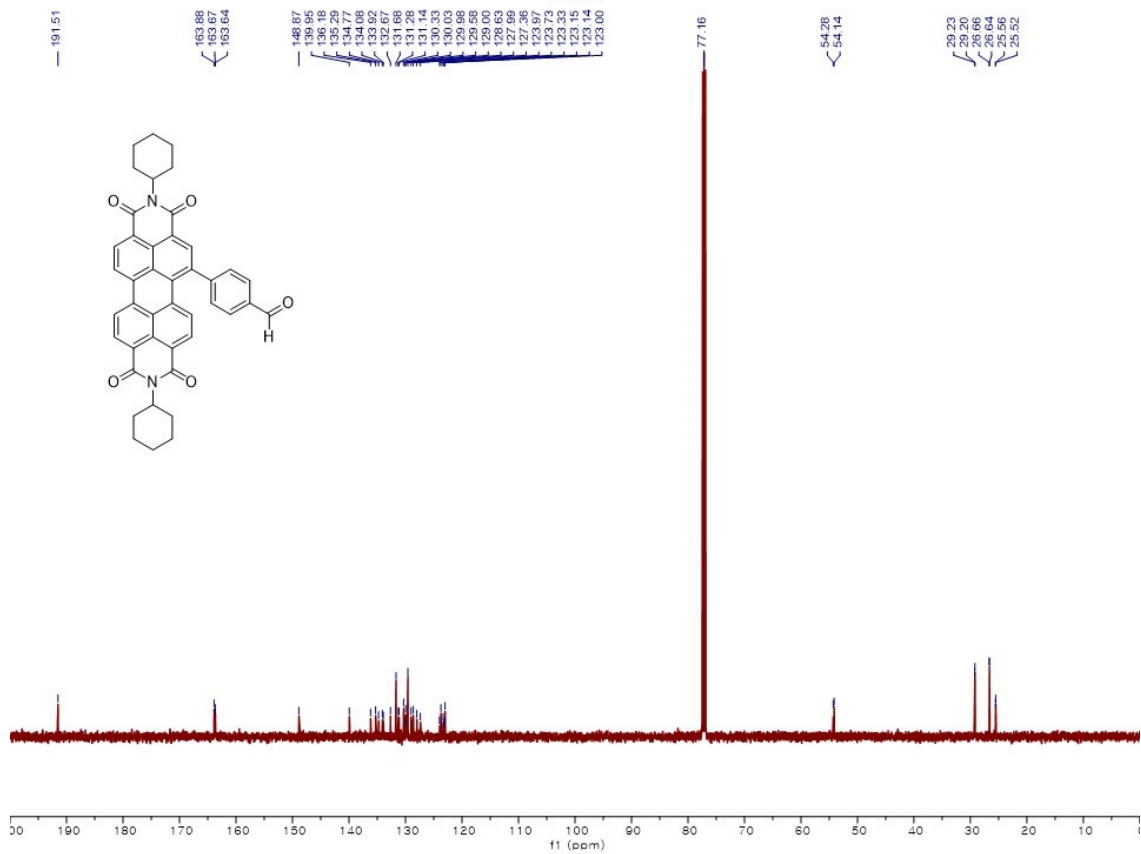

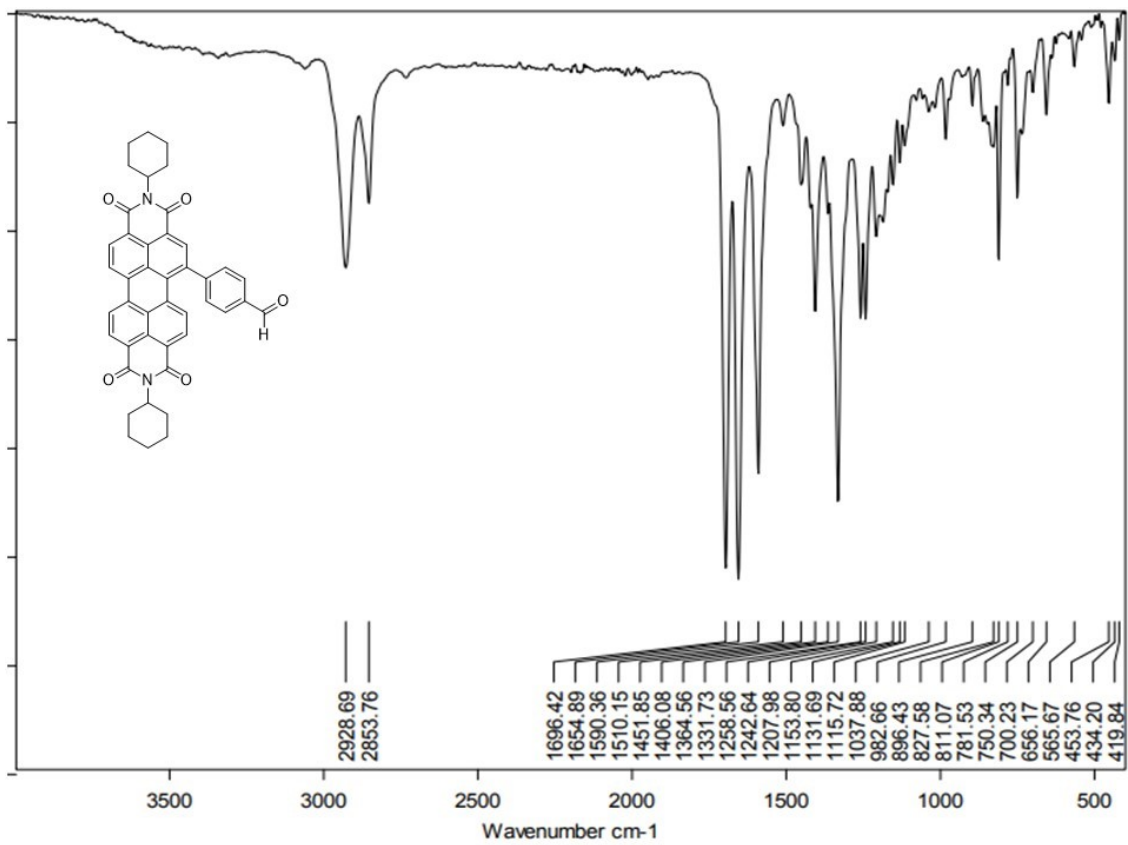

Supplement: d3ce01146a1.pdf [file d3ce01146a1.pdf]
